# Supplementary material for: Molecular Characterization of Vitellogenin and Vitellogenin Receptor of Bemisia tabaci
Source: PubMed Central journal article supplement (PMC4861306; doi:10.1371/journal.pone.0155306), 2016-05-09
Supplement: pone.0155306.s008.pdf [file pone.0155306.s008.pdf]

LPD\_N

A7BK94\_Nilaparvata\_lugens
Q868N5\_Apis\_mellifera
R4KE43\_Helicoverpa\_armigera
Q9USD8\_Plautia\_stali
O02024\_Riptortus\_clavatus
D6W7J2\_Tribolium\_castaneum
D6W721\_Tribolium\_castaneum
B\_tabaci\_Asiat
BAG84131\_Tetranychus\_urticae
ADU04394.1\_B\_tabaci\_Q
Q16927\_Aedes\_aegypti
G0ETK0\_Nilaparvata\_lugens
Q9BPS0\_Periplaneta\_americana
E0VE52\_Pediculus\_humanus\_corporis
B0W351\_Culex\_quinquefasciatus
O76823\_Blattella\_germanica
Q7PQM2\_Anopheles\_gambiae
UPI000258E3A9\_Megachile\_rotundata
ADU04392.1\_1\_B\_tabaci\_B
Q9U8M0\_Periplaneta\_americana
ADU04393.1\_B\_tabaci\_EHJ-II
Q27309\_Bombyx\_mori

AELVEAKNENQAVFKISKABYADVHQNLSGGWQBELRSNELQYKQLPLS
ALLTVQAKDSNVLAAKVWNGQYARVQOSMPD GWETBEISDQMLEBLRDLPLS
AQFIVRVKYPGRLLAKLENPVHAQFNQQLPNNMAVP---SDLKYETVQNL
GKLYAYVEPDNKVTFQFDADAKYADFNEHFPBEGWATDLHHYQFSYKSPPIK
GQLTVRAESDNKATAVIEENAKYADLQANLSRGWDSEIQENELQYNELPIS
AKLWVRPRSDGDEHLAGTIEEPQYAEIHSKLYRSWQDSEIPDSSELSYSPISLS
AQLYIQPRSDGNLGAKISNAQYAKIHEBELSBEGWETBIPDSQVSYQQLPLS
ANFYVQPFSSDRLSAYIQNAETAQVHAEPLPSGYESHIPSSQLNYKSMPLS
-----
ANFYVQPFSSDRLSAYIQNAETAQVHAEPLPSGYESHIPSSQLNYKSMPLS
AYLVIRPKSRDYVVAVYVQPEYAVFNERLPHYGYATKFFYHDMFKFQPMFMS
AELVEAKNENQAVFKISKABYADVHQNLSGGWQBELRSNELQYKQLPLS
GKLVIEPHTPSVLRGLKDTYHMTVHRMLPDGWDQKFFERESNWERVGMK
NKLTLTPVKDEBYLGTFTQSEVTEVHTTLPGGVDHSVPLENAKYSPLSLP
AKMVINPKSDGYVVGRIDRAHYAQFNQYLADGHRSELSDLKLTWKPMPLS
ARLSLDRNEDQLITGKVTBAQFSPVNTQFSSGWDESVPDEKLHWDVVPMS
GYLVIRPKDHNYYVAYIDRPMYAAFNEYLPRGYRTELSRFNLKQWPMFMS
GYLTVQAKDEKGLTAKLRGQYFPHISNMSRSGWD-----
ANFIVQPLESSDRLSAQIQNAEBIAQVHTELPAGYESHIPSSQLNYKSMPLS
AKLIIQPKTREBELHAQLVEVEHESQINKELPSGWDQEBIBIHD--WQQLSAL
ANFYVQPFSSDRLSAYIQNAETAQVHAEPLPSGYESHIPSSQLNYKSMPLS
AQFTIRVKSPGRLOAKLENPQHGHNFBNEQLPDPRELPV---DLKYOPTPNI

LPD\_N

A7BK94\_Nilaparvata\_lugens
Q868N5\_Apis\_mellifera
R4KE43\_Helicoverpa\_armigera
Q9USD8\_Plautia\_stali
O02024\_Riptortus\_clavatus
D6W7J2\_Tribolium\_castaneum
D6W721\_Tribolium\_castaneum
B\_tabaci\_Asiat
BAG84131\_Tetranychus\_urticae
ADU04394.1\_B\_tabaci\_Q
Q16927\_Aedes\_aegypti
G0ETK0\_Nilaparvata\_lugens
Q9BPS0\_Periplaneta\_americana
E0VE52\_Pediculus\_humanus\_corporis
B0W351\_Culex\_quinquefasciatus
O76823\_Blattella\_germanica
Q7PQM2\_Anopheles\_gambiae
UPI000258E3A9\_Megachile\_rotundata
ADU04392.1\_1\_B\_tabaci\_B
Q9U8M0\_Periplaneta\_americana
ADU04393.1\_B\_tabaci\_EHJ-II
Q27309\_Bombyx\_mori

QANQVFQVNYK-QGAVRSLOVNRNTPTWELNMIKGFVSLFQVDVDTGQNAI
G--KPFQIRMK-HGLIRDLIIVDRDPTWEVNIILKSIVGQLQVDTQGENAV
D--KPFEBISVB-GGRVVALSLPSAFLLSHENLLKGLLSTLQVDSLAYHHV
N--DVEQVYFN-NGLVDKLFVYKDI PHWELNFIKAIASQFQTDVQGNLK
K--DPFBIHFR-NGVIEKMMVVKNDI PQWQLNFKSISASQFQVDTQGNLK
S--KPFELIKMD-NNAVSDLVVDRSISNWEANMIKAIIVSLOLQDITNAENLI
S--KPFQIGLY-KGVIRNVMDKQIKNWEANMIKSIVSLOLQDITKATNLI
H--EPFBIYLY-KGVVSNLRVNKNVSDWELNIIKAVVSIQVDTQGNLK
-----
H--EPFBIYLY-KGVVSNLRVNKNVSDWELNIIKAVVSIQVDTQGNLK
S--KPFGIYRH-KGAIKGLYVEKTI PNNEVNIILKAWISLOVDTRGANLM
QANQVFQVNYK-QGAVRSLOVNRNTPTWELNMIKGFVSLFQVDVDTGQNAI
N--KPFVHVGVNEQFNKLIIVTETDPVWETNMIKGVLSQIQVNLKEV---
R--EPFVVKTK-DGIVDELVVSKDLPVWHVNVIRSIVSQFQIDTQGRRLI
S--KPFGIKIK-KGAIKGLYVEKTVPNHEVNIILKSIVSLOLQDITGANLI
Q--QPFQIBLNSRGEVVRKLRVNKFVELWBIINMIKAIISLOVVDV---
S--KPFGIYYN-KGAVGFYVEKTVPNHEVNMMLKGVVLSLOLQDITGAVYI
-----
B--EPFBIYLY-KGAVRSLOVNRNTPTWELNMIKGFVSLFQVDVDTGQNAI
E--QPFBIYLY-KGAVRSLOVNRNTPTWELNMIKGFVSLFQVDVDTGQNAI
K--DAFAIILQ-NGHIVNVKVKDSTPNWAVNIIKGLISLQVNTQADNLV
H--EPFBIYLY-KGVVSNLRVNKNVSDWELNIIKAVVSIQVDTQGNLK
D--KVFEBIBI-DGGRIVSLDFPSTVVPVQENLIKGLISALQDITSAHRVI

LPD\_N

A7BK94\_Nilaparvata\_lugens
Q868N5\_Apis\_mellifera
R4KE43\_Helicoverpa\_armigera
Q9USD8\_Plautia\_stali
O02024\_Riptortus\_clavatus
D6W7J2\_Tribolium\_castaneum
D6W721\_Tribolium\_castaneum
B\_tabaci\_Asiat
BAG84131\_Tetranychus\_urticae
ADU04394.1\_B\_tabaci\_Q
Q16927\_Aedes\_aegypti
G0ETK0\_Nilaparvata\_lugens
Q9BPS0\_Periplaneta\_americana
E0VE52\_Pediculus\_humanus\_corporis
B0W351\_Culex\_quinquefasciatus
O76823\_Blattella\_germanica
Q7PQM2\_Anopheles\_gambiae
UPI000258E3A9\_Megachile\_rotundata
ADU04392.1\_1\_B\_tabaci\_B
Q9U8M0\_Periplaneta\_americana

KSRRNIVPNGQ--QVSGSFKVMEDSVTGKCBETHYDVDELPMRVVQHPPI
KVN SVQVPTDD--EPYASFKAMEDSVGGKCEVLYDIAPLSDFVIHRSPEL
HNBQDSYDKE--RQQLGFKKMETDVTGDCBETLYTVSPV-----AABWR
KSKFNDVPKGN--QLTGIFKTWEDSVNGEYEVNNEVSVLPEYLIQSPEL
DSKINLVPSGQSGEPMGVYKTMEDSVNGIYETLYDISVLPBYILQARPEL
PSSINILTVQEG--SSTAVFKTMEPTVTGVCETLYEIHPLPDYILQTPWL
KSSHNLQPKEN--KPYGVYKTMEDSVTGKCBETHYDVDELPMRVVQHPPI
--SASPMPKDQ---TCTLMKDSI-----
KSSHNLQPKEN--KPYGVYKTMEDSVTGKCBETHYDVDELPMRVVQHPPI
HSSKPIHPSKN--BNAGYKVMEDPLVTGECETHYDVNLIPAYMIQAHKQW
KSRRNIVPNGQ--QVSGSFKVMEDSVTGKCBETHYDVDELPMRVVQHPPI
-GDPDRDEQED--RLRKIFKVESSVTGRCEVLYDITPITKENMLPQ---
PSKLN SVPHGD--BTAVYKVMEDTVEGECETHYDVTPLPKYVVLTPSPL
KSKYNQLPKEN--DPRGFTVLEEDYFAGLNEVRYDFKPLSEQLRTPPEL
-----
EDKKVYRVFESTVTGRCEALYEVLDHLYPTTYLNPWQW
KSEFNQFPENN--TLTGVIKTMEDSVTGKCBETHYDVDELPMRVVQHPPI
EGHDVKVPDEN--DPRGFTVLEEDYFAGLNEVRYDFKPLSEQLRTPPEL
KSSHNLQPKEN--KPYGVYKTMEDSVTGKCBETHYDVDELPMRVVQHPPI
RHRYNILPNAS--TDSAVYSIRETTITGECETHYDVDELPMRVVQHPPI

ADU04393.1\_B\_tabaci\_SHJ-II  
Q27309\_Bombyx\_mori

KSSHNQLPKEN--KPYGVYKTMEDSVTGBCEBTLTYDVSPLPEITLQTKPWL  
HDSQNNYDRE---QQQGLFRKMETDVTGDCBTLTYTVSPV-----ASEWR

LPD\_N

A7BK94\_Nilaparvata\_lugens  
Q868N5\_Apis\_mellifera  
R4KE43\_Helicoverpa\_armigera  
Q9U5D8\_Plautia\_stali  
O02024\_Riptortus\_clavatus  
D6W7J2\_Tribolium\_castaneum  
D6W721\_Tribolium\_castaneum  
B\_tabaci\_Asiaticus  
BAG84131\_Tetranychus\_urticae  
ADU04394.1\_B\_tabaci\_Q  
Q16927\_Aedes\_aegypti  
G0ETK0\_Nilaparvata\_lugens  
Q9BPS0\_Periplaneta\_americana  
E0VE52\_Pediculus\_humanus\_corporis  
B0W351\_Culex\_quinguefasciatus  
O76823\_Blattella\_germanica  
Q7PQM2\_Anopheles\_gambiae  
UPI000258B3A9\_Megachile\_rotundata  
ADU04392.1\_1\_B\_tabaci\_B  
Q9U8M0\_Periplaneta\_americana  
ADU04393.1\_B\_tabaci\_SHJ-II  
Q27309\_Bombyx\_mori

APLA-VK-QQGQGGQGSRSRLIQVVKSRNFSNCDNPVTYHFGFTQESNPF  
VPMPTLK-GDGR-----HMEVIKIKNFDCDQRINYHFGMTDNSRLE  
RELPRFANEEDP-----MEITKSKNYGHCHRRVAYHFGVPEGAEWT  
APLPHLR-NEGE-----FYELLKTRNFSSNRHLVYRYGFNGHEGWD  
APLPHLK-GDGE-----FIEVVKTRNFSNSNQHVYIRFGSSGHEGWE  
APLKLK-GRGQ-----VIEVVKNKNFTHSKETPSYHFGFHGVDREFD  
VPHKHLI-EDGD-----VIEIVKNKNFTHSQSPSYHAGLDGIYGYQ  
VFPFNFR-ENGQ-----FIDIVKTTNYSKCEBERSAYHFGITGLTNWK  
-----RTFDNVTYRT-----  
VFPFNFR-ENGQ-----FIDIVKTTNYSKCEBERSAYHFGITGLTNWK  
VFPQQLRGEDGQ-----FIQVTKTQNFDRCDQRMGYHFGFTGYSDFR  
APLAVKQQGGQ--GQCHSRLIQVVKSRNFSNCDNPVTYHFGFTQESNPF  
-PLVEIBENVN-----VLQVMKTNFTDCKKLPYSYVHGFYFNHNVF  
APTYHVG-DKED-----LIDIVKTANFSNCEBQRPGYHFGLTGLTDWK  
VFPQPYMQQDDE-----IFEIVKAKNFSNCDRRMGYHFGITGASDIK  
TQQHDTK-----LRIMKTHQFTNCRHNSAYKLFHFNAPFYH  
VFPQQLWLEEDQH-----VFHVVKSRNFDHCEBQRMGFHFGSDFK  
VPIPELK-GSGQ-----HIDIVKTKSYDRYPMSENVFGMTRQMKKE  
VFPFKLR-ENGQ-----VIDIVKATNYSKCEBERSAYHFGITGLTNWK  
APLSNVN-DN-----VIDIEKTNFSNCKRRPAVHYGLAGIPDL  
VFPFNFR-ENGQ-----FIDIVKTTNYSKCEBERSAYHFGITGLTNWK  
RELKPFANEQDP-----VEVTKSTNYGHCHRRVAYHFGVPEGAEWT

LPD\_N

A7BK94\_Nilaparvata\_lugens  
Q868N5\_Apis\_mellifera  
R4KE43\_Helicoverpa\_armigera  
Q9U5D8\_Plautia\_stali  
O02024\_Riptortus\_clavatus  
D6W7J2\_Tribolium\_castaneum  
D6W721\_Tribolium\_castaneum  
B\_tabaci\_Asiaticus  
BAG84131\_Tetranychus\_urticae  
ADU04394.1\_B\_tabaci\_Q  
Q16927\_Aedes\_aegypti  
G0ETK0\_Nilaparvata\_lugens  
Q9BPS0\_Periplaneta\_americana  
E0VE52\_Pediculus\_humanus\_corporis  
B0W351\_Culex\_quinguefasciatus  
O76823\_Blattella\_germanica  
Q7PQM2\_Anopheles\_gambiae  
UPI000258B3A9\_Megachile\_rotundata  
ADU04392.1\_1\_B\_tabaci\_B  
Q9U8M0\_Periplaneta\_americana  
ADU04393.1\_B\_tabaci\_SHJ-II  
Q27309\_Bombyx\_mori

PASNQMG--NLVSRAAMGRIIAGE--PDSYTIHSSVTQNEIAISPFGYN  
PGTNKNG--KFFSRSSSTRIVISES--LKHFTIQSSVTSKMMVSPRLYD  
GTAHRSEBKQFIAQSTVSRILAGKQ----GPIYKAETTSTVSVHPHLYG  
AGTNQMG--NFLSRTSQSRIILSGK--LNRFTIQSSVTEKVLIAPIHYN  
AGTNQMG--DFLSRSSQSRVILSGK--LNRFTIQSAVTEKVLVAPHVYN  
-IDNQIG--EFFSRTSVSRAVITGN--LDSFTLQSSVTVDEVTVPMSQD  
PG-NKVG--KFLSRTSVSQAVITGT--LDKYTEVQSSVTEQVIRPTLAD  
PASNQMG--QFLSRSNINRVVISGN--VKYYTIQSSVSTNKIVISPQMYE  
-----  
PASNQMG--QFLSRSNINRVVISGN--VKYYTIQSSVSTNKIVISPQMYE  
PNTNQMG--NVASKSLVSYMYLTGN--WYNFTIQSSSMINKVAIAPSLVN  
PASNQMG--NLVSRAAMGRIIAGE--PDSYTIHSSVTQNEIAISPFGYN  
PAQNKAG--FMSRSQQRTRIVSRNKETGRFTIRSVTFHEVVLKPELFN  
PTTNKLG--NFLSRSVTRVLSGN--LKTYTVHSSVTSKVIIVSPBYN  
PNTNQMG--NILSKSAVSQIFVVGK--IHNFTIQSASTSKILVSPSLVH  
LKQHKPE--TFLSNSAVSRVIADGD-NLKNFTFYSGETIHKIVLNPBIYN  
PNTNQMG--NIMTKSEVTQMYLTGN--WYNYTIQSSVTVNKKVVVSPSLVN  
PKTNK---NLMSKSSSTRIVISGS--LKDFVIQSAVSTSKTTITPSFND  
PASNQMG--QFLSRSNINRVVISGN--VKQYHIQSSVSTNKIVISPQMYE  
PGNQMG--DFLARSSVSRVVISGT--LNKFTVQSSVTTNQVVMSPBYN  
PASNQMG--QFLSRSNINRVVISGN--VKYYTIQSSVSTNKIVISPQMYE  
GTAHKTOEQQLIGRATYSRILTGKE----GPIYKAETTSTVSVHPHLYG

LPD\_N

A7BK94\_Nilaparvata\_lugens  
Q868N5\_Apis\_mellifera  
R4KE43\_Helicoverpa\_armigera  
Q9U5D8\_Plautia\_stali  
O02024\_Riptortus\_clavatus  
D6W7J2\_Tribolium\_castaneum  
D6W721\_Tribolium\_castaneum  
B\_tabaci\_Asiaticus  
BAG84131\_Tetranychus\_urticae  
ADU04394.1\_B\_tabaci\_Q  
Q16927\_Aedes\_aegypti  
G0ETK0\_Nilaparvata\_lugens  
Q9BPS0\_Periplaneta\_americana  
E0VE52\_Pediculus\_humanus\_corporis  
B0W351\_Culex\_quinguefasciatus  
O76823\_Blattella\_germanica  
Q7PQM2\_Anopheles\_gambiae  
UPI000258B3A9\_Megachile\_rotundata  
ADU04392.1\_1\_B\_tabaci\_B

QQKGVVGTLMNATLVSVSHASSGSPQ-----  
RQNGLVLSRMNLTAKMEKTSKPLPM-----  
KQKAQVHSYVQLILVSVSQDQSGVEWQ-----  
SQKGMVGSRVNLTLDYSNFKGSVPT-----  
NQKGIIVSSMNIITLQQA-TGSQGSPO-----  
KQRGSTRSIVNITLVSMDENQEFEO-----  
QKKGSVNSKLNVTLLQVAQPVSENEY-----  
SQKGMVISVMMNMTLASF-HQANGSPR-----  
-----  
SQKGMVISVMMNMTLASF-HQANGSPRNGHNGHNGNNGHNGNNGHNGHNGN  
KBPALVYAQVNMTLNDV-HPYDKVPM-----  
QQKGVVGTLMNATLVSVSHASSGSPQ-----  
SQQGISVSRMNVTLLEBI-KSQQHIPP-----  
NQKGEVISRVNVTLVSQVGTSTGSG-----  
TEKAMVLAQVNVTLNQI-KRSQKBPV-----  
KQKGMVLSHINVTVERKGRRLTVIDY-----  
SQKAMVYAQVNMTLNEI-TPYDKYPE-----  
AQNSTVLSKLSLTLTLEDMEIKTPMPS-----  
SQKGMVSVMMNMTLASF-HQANGSPR-----



ADU04392.1\_1\_B\_tabaci\_B  
 Q9U8M0\_Periplaneta\_american  
 ADU04393.1\_B\_tabaci\_EHJ-II  
 Q27309\_Bombyx\_mori

NNNNRNNNNNNNNNNNNR--NNNNNNNNNNANDNNNSANNSSNNNSNNNSANN  
 QQRIRKANRHS-----  
 NNNNRNNNNNNNNNNNNRNNNNNNNNNNANDNNNSANNSSNNNSNNNSANN  
 EHPHQSNO-----

LPD\_N

A7BK94\_Nilaparvata\_lugens  
 Q868N5\_Apis\_mellifera  
 R4KE43\_Helicoverpa\_armigera  
 Q9U5D8\_Plautia\_stali  
 O02024\_Riptortus\_clavatus  
 D6W7J2\_Tribolium\_castaneum  
 D6W721\_Tribolium\_castaneum  
 B\_tabaci\_Asial  
 BAG84131\_Tetranychus\_urticae  
 ADU04394.1\_B\_tabaci\_Q  
 Q16927\_Aedes\_aegypti  
 G0ETK0\_Nilaparvata\_lugens  
 Q9BPS0\_Periplaneta\_american  
 E0VE52\_Pediculus\_humanus\_corporis  
 B0W351\_Culex\_quinquefasciatus  
 O76823\_Blattella\_germanica  
 Q7PQM2\_Anopheles\_gambiae  
 UPI000258B3A9\_Megachile\_rotundata  
 ADU04392.1\_1\_B\_tabaci\_B  
 Q9U8M0\_Periplaneta\_american  
 ADU04393.1\_B\_tabaci\_EHJ-II  
 Q27309\_Bombyx\_mori

---NNNDDAYWRSQKTKFRSRRSI---LRNYNNEBDDNNQNRNQR  
 -----  
 -----  
 -----  
 -----  
 -----  
 -----  
 ---KNBNNHHNGDANASRNRSRRDLSQ---YNNGNNNNGNNDNDABEYBKR  
 -----  
 ---ANNNNNRRNDBNVSRSSRRRDISQYKYNSENNNNNDNBDEKNNSGR  
 -----  
 ---RYRRDLNAIKBKKYYEAYKMDQYRLHRLNDT  
 ---NNNDAYWRSQKTKFRSRRSI---LRNYNNEBDDNNQNRNQR  
 -----  
 ---QHKDALKQVEKREBRSRNRDLNAQKBBKYYEAYKMDQYRLSRDNDT  
 -----  
 ---RNRDLNAPFKBKQYYEAYKMDQYRLRQKNDT  
 NNNNNKNNNNRNDENVSRSSRRRDISQYKYNSENNNNNDNBDEKNNSGR  
 NNNNNKNNNNRNDENVSRSSRRRDISQYKYNSENNNNNDNBDEKNNSGR  
 -----

LPD\_N

A7BK94\_Nilaparvata\_lugens  
 Q868N5\_Apis\_mellifera  
 R4KE43\_Helicoverpa\_armigera  
 Q9U5D8\_Plautia\_stali  
 O02024\_Riptortus\_clavatus  
 D6W7J2\_Tribolium\_castaneum  
 D6W721\_Tribolium\_castaneum  
 B\_tabaci\_Asial  
 BAG84131\_Tetranychus\_urticae  
 ADU04394.1\_B\_tabaci\_Q  
 Q16927\_Aedes\_aegypti  
 G0ETK0\_Nilaparvata\_lugens  
 Q9BPS0\_Periplaneta\_american  
 E0VE52\_Pediculus\_humanus\_corporis  
 B0W351\_Culex\_quinquefasciatus  
 O76823\_Blattella\_germanica  
 Q7PQM2\_Anopheles\_gambiae  
 UPI000258B3A9\_Megachile\_rotundata  
 ADU04392.1\_1\_B\_tabaci\_B  
 Q9U8M0\_Periplaneta\_american  
 ADU04393.1\_B\_tabaci\_EHJ-II  
 Q27309\_Bombyx\_mori

NNNNNNNNDSSEECNENQNTNNKHNNKNWNNNNNNNNKNWNN-----  
 -----  
 -----  
 -----  
 -----  
 -----  
 -----  
 NGHNGHNGHNGH---NGHNGHNG---KNVDGSSSSSSSS  
 -----  
 NGHNGHNGNNGHNGN---NGHNGHNGNNGQNNNSNGSSSSSSSSSSSSSSGS  
 SS-----  
 NNNNNNDSSSESNENQNNNNKHNKNWNNNDNNKNWNNN-----  
 -----  
 -----  
 SSDSSSS-----  
 -----  
 SSDSSSS-----  
 -----  
 -----  
 NGHNGHNGNNGHNGNNGHNGHNGHNGNNGQNNNSNGSSSSSSSSSSSSSSGS  
 -----  
 NGHNGHNGNNGHNGNNGHNGHNGHNGNNGQNNNSNGSSSSSSSSSSSSSSGS  
 -----

LPD\_N

A7BK94\_Nilaparvata\_lugens  
 Q868N5\_Apis\_mellifera  
 R4KE43\_Helicoverpa\_armigera  
 Q9U5D8\_Plautia\_stali  
 O02024\_Riptortus\_clavatus  
 D6W7J2\_Tribolium\_castaneum  
 D6W721\_Tribolium\_castaneum  
 B\_tabaci\_Asial  
 BAG84131\_Tetranychus\_urticae  
 ADU04394.1\_B\_tabaci\_Q  
 Q16927\_Aedes\_aegypti  
 G0ETK0\_Nilaparvata\_lugens  
 Q9BPS0\_Periplaneta\_american  
 E0VE52\_Pediculus\_humanus\_corporis  
 B0W351\_Culex\_quinquefasciatus  
 O76823\_Blattella\_germanica  
 Q7PQM2\_Anopheles\_gambiae

---NDNKNWNNNDNNKNNRNNNDNDSSSS---SSSSSSSSSS  
 ---DNSLSSSEBKLKQDILNLRTDISSSSS-----  
 ---SRARRSSDRQQEFPNKDWRSSSSSDSS-----  
 ---SSEETNYNGGLKRXTRSVTPPHSSSSSSSESSSSAS-SSSSSSSDSS  
 ---EQSSINRKGKNARSQADSSSSSSSSSS-----SSSSSSSSSS  
 ---ESSSSHSQESSNQIRRHKRSLSHASSE-----  
 ---LQYTSFSLDNYQPDSI-----  
 ---BENDRYNNGKFASFARHNGSGSSSSSSSSD-----SSDSSSSSSSS  
 -----  
 SSSSEBNSRYNNGKFASFARHNGSGSSSSSSSPDSSDSSSSSSSSSSSSSS  
 ---DSSSSDSSSSSSSESKERHNGTSSSYSS-----SSSSSSSSSSSS  
 ---DNNKNWNNNNKNNRNNNDNDSSSSSSSS-----SSSSSSSSSSSS  
 ---SRRRSLQNSKRSINMYNDSSSSSSS-----  
 ---VKPTGYTEGGFTEQVRNTRHIDEKTLV-----  
 ---DDSSSSSSSSSSSESRHRKNGTLADN-----SSSSSSSSSS  
 ---BANFDASSGLTEQPVTFRPRRQLFQG-----  
 ---DSSSSSSSSSSSESDHDFYSSESD-----

UPI000258B3A9\_Megachile\_rotundata  
 ADU04392.1\_1\_B\_tabaci\_B  
 Q9U8M0\_Periplaneta\_americana  
 ADU04393.1\_B\_tabaci\_EHJ-II  
 Q27309\_Bombyx\_mori

LPD\_N

A7BK94\_Nilaparvata\_lugens  
 Q868N5\_Apis\_mellifera  
 R4KE43\_Helicoverpa\_armigera  
 Q9U5D8\_Plautia\_stali  
 O02024\_Riptortus\_clavatus  
 D6W7J2\_Tribolium\_castaneum  
 D6W721\_Tribolium\_castaneum  
 B\_tabaci\_Asial  
 BAG84131\_Tetranychus\_urticae  
 ADU04394.1\_B\_tabaci\_Q  
 Q16927\_Aedes\_aegypti  
 G0ETK0\_Nilaparvata\_lugens  
 Q9BPS0\_Periplaneta\_americana  
 E0VES2\_Pediculus\_humanus\_corporis  
 B0W351\_Culex\_quinquefasciatus  
 O76823\_Blattella\_germanica  
 Q7PQM2\_Anopheles\_gambiae  
 UPI000258B3A9\_Megachile\_rotundata  
 ADU04392.1\_1\_B\_tabaci\_B  
 Q9U8M0\_Periplaneta\_americana  
 ADU04393.1\_B\_tabaci\_EHJ-II  
 Q27309\_Bombyx\_mori

LPD\_N

A7BK94\_Nilaparvata\_lugens  
 Q868N5\_Apis\_mellifera  
 R4KE43\_Helicoverpa\_armigera  
 Q9U5D8\_Plautia\_stali  
 O02024\_Riptortus\_clavatus  
 D6W7J2\_Tribolium\_castaneum  
 D6W721\_Tribolium\_castaneum  
 B\_tabaci\_Asial  
 BAG84131\_Tetranychus\_urticae  
 ADU04394.1\_B\_tabaci\_Q  
 Q16927\_Aedes\_aegypti  
 G0ETK0\_Nilaparvata\_lugens  
 Q9BPS0\_Periplaneta\_americana  
 E0VES2\_Pediculus\_humanus\_corporis  
 B0W351\_Culex\_quinquefasciatus  
 O76823\_Blattella\_germanica  
 Q7PQM2\_Anopheles\_gambiae  
 UPI000258B3A9\_Megachile\_rotundata  
 ADU04392.1\_1\_B\_tabaci\_B  
 Q9U8M0\_Periplaneta\_americana  
 ADU04393.1\_B\_tabaci\_EHJ-II  
 Q27309\_Bombyx\_mori

LPD\_N

A7BK94\_Nilaparvata\_lugens  
 Q868N5\_Apis\_mellifera  
 R4KE43\_Helicoverpa\_armigera  
 Q9U5D8\_Plautia\_stali  
 O02024\_Riptortus\_clavatus  
 D6W7J2\_Tribolium\_castaneum  
 D6W721\_Tribolium\_castaneum  
 B\_tabaci\_Asial  
 BAG84131\_Tetranychus\_urticae  
 ADU04394.1\_B\_tabaci\_Q  
 Q16927\_Aedes\_aegypti  
 G0ETK0\_Nilaparvata\_lugens  
 Q9BPS0\_Periplaneta\_americana  
 E0VES2\_Pediculus\_humanus\_corporis  
 B0W351\_Culex\_quinquefasciatus  
 O76823\_Blattella\_germanica

Q7PQM2\_Anopheles\_gambiae  
UPI000258E3A9\_Megachile\_rotundata  
ADU04392.1.1\_B\_tabaci\_B  
Q9U8M0\_Periplaneta\_americana  
ADU04393.1\_B\_tabaci\_EHJ-II  
Q27309\_Bombyx\_mori

FTILARVLRMTMHYQDIYDVCQKLFVVSQKEREEGNSHSESFAKKVDANWTF  
FTHLVNIIIRTMNRNQAIAEAKNKWQISPKKLLKWDKAD--AFRNRWSVF  
FNMLVEELRRTLDAKQMEQASQELHFNSA--QASSHSRQD-ALKSLAWKSF  
LMMMRDVRVTRMTAKQLQKATSLIHSESK-----HDLGWIAAY  
FNMLVEELRRTLDAKQMEQASQELHFNSA--QASSHSRQD-ALKSLAWKSF  
FNILVRLIASMSTEQLSQTSRSIETAKT-----SNNIIKSDMWMIF

LPD\_N

A7BK94\_Nilaparvata\_lugens  
Q868N5\_Apis\_mellifera  
R4KE43\_Helicoverpa\_armigera  
Q9U5D8\_Plautia\_stali  
O02024\_Riptortus\_clavatus  
D6W7J2\_Tribolium\_castaneum  
D6W721\_Tribolium\_castaneum  
B\_tabaci\_Asiaticus  
BAG84131\_Tetranychus\_urticae  
ADU04394.1\_B\_tabaci\_Q  
Q16927\_Aedes\_aegypti  
GOETK0\_Nilaparvata\_lugens  
Q9BPS0\_Periplaneta\_americana  
E0VES2\_Pediculus\_humanus\_corporis  
B0W351\_Culex\_quinquefasciatus  
O76823\_Blattella\_germanica  
Q7PQM2\_Anopheles\_gambiae  
UPI000258E3A9\_Megachile\_rotundata  
ADU04392.1.1\_B\_tabaci\_B  
Q9U8M0\_Periplaneta\_americana  
ADU04393.1\_B\_tabaci\_EHJ-II  
Q27309\_Bombyx\_mori

KHATANAGTGPALBAIKNWVEKGDVRNEKAABLVAVLPRTARLPDQYIK  
RDAITQTGTGPAFLTIKBIWIERGTTKSMBAANIMSKLPKTVRTPDTSYIR  
RDAVVQAGTTPPAFLQIKTWILNKKLQNEBAAQVISTLARLTRYPTKEBIMI  
RDAVAQAGTGPALVTIYSWLKSAKVRNEGAQLLAVLPKAAARYPTTEYMD  
RDAVAQAGTGPALVTIKQWIQSCKVQGEBAQQLLAVLPYRTARYPTTEYMN  
RDAVAEAGTGPALLNIQEWIREGKISRBAAEVUVSTAAVSARQPTTEKYMK  
RDAVAQAGTGPALYNIKEWILSGKIDGREAAQVIAVAANAARQPTTEBYIK  
CDALVEAGTGPAPFLQIQKIIIEHQQVSDAABARMISRLPVTARFPDKBYMN  
CEFIA-----PYTTMFNTRTNST  
CDALVEAGTGPAPFLQIQKII-----PYTTMFNTRTNST  
RDAVAEAGTTPSAFKLIFDFIKEKKLRGYBAATVIASLAQSI RYPTTEHLLH  
KHATANAGTGPALBAIKNWVEKGDVRNEKAABLVAVLPRTARLPDQYIK  
RDSVAQAGTTPAALKMVTWIRKEYIKDEBAAKVVAVIPHAADPTDNYIA  
RDVLAQAGTGPALTTIVSLITSKKLGEBAAQVVTADTARYPTTEBYLN  
RDAMAEAGTTPVFKVIKQYIEBKLRGIBAAQVVTATLPKRIRYPTTEBLMH  
RDAVSQAGTWSALNSIQCFISSEMVEPKBASHLITVLPAAVSDKNKAYLH  
RDALAQAGTTPPAFKVIKBLIEBKLRGDBAAQVVIATLPKTI RYPTTEVMH  
RDAITQAGTGPALLTIKNWVENGDLRSEBAEMLSKIPASARQITAKYIE  
CDALVEAGTGPAPFLQIQKIIIEHQQVSDAABARMISRLPVTARFPDKBYMN  
RDMVSESGTHPALBELSIWIIISKKLSSEBGAELLATLPRAVIMPTPEYFE  
CDALVEAGTGPAPFLQMQKIIIEHQQVSDAABARMISRLPVTARFPDKBYMN  
RDGVTQAGTLPAPFKQIQSWEIENKKIQEBAAQVVVALPRTLTRYPTKQIMT

LPD\_N

A7BK94\_Nilaparvata\_lugens  
Q868N5\_Apis\_mellifera  
R4KE43\_Helicoverpa\_armigera  
Q9U5D8\_Plautia\_stali  
O02024\_Riptortus\_clavatus  
D6W7J2\_Tribolium\_castaneum  
D6W721\_Tribolium\_castaneum  
B\_tabaci\_Asiaticus  
BAG84131\_Tetranychus\_urticae  
ADU04394.1\_B\_tabaci\_Q  
Q16927\_Aedes\_aegypti  
GOETK0\_Nilaparvata\_lugens  
Q9BPS0\_Periplaneta\_americana  
E0VES2\_Pediculus\_humanus\_corporis  
B0W351\_Culex\_quinquefasciatus  
O76823\_Blattella\_germanica  
Q7PQM2\_Anopheles\_gambiae  
UPI000258E3A9\_Megachile\_rotundata  
ADU04392.1.1\_B\_tabaci\_B  
Q9U8M0\_Periplaneta\_americana  
ADU04393.1\_B\_tabaci\_EHJ-II  
Q27309\_Bombyx\_mori

TFEQFATSSNVQNKYLNSTIILGFSEILRKAQVSDTKHMRFGVHSFGR  
SFFELLQNPKVSNEQFLNNTAATLSFCEMIHNNAQVNRKSIHNNYPVHTFGR  
QFFELAMNPVQEQBRNLNTSALIAATKFIYMGQVNNETAHYYPVSHMYGR  
YLFGMVKSKEIQNKYLNDSAVLSFADLVRRSQVDKKSAAHQRYPIHLYGA  
YFFDMVTSEIQRQRLNNTALFAFTELSRKSQVDYDVAHNRYPVHLHAK  
VYFEMIQNDQIMEQPHYLNESLLLAYTTLIHQVYVNEBYSKSKYPVHSFGS  
FFNDMIQDEKIMSQQHLNESALLSYTNLVRQVYANRGGSHAKYIPVYSFGS  
SFFNFVRSNNVQHQNQLNETALLAFABELCRKADVNARNAHNYYPVHVYGR  
-----LSFARKADVNARNAHNYYPVHVYGR  
KLLSLLS-----LSFARKADVNARNAHNYYPVHVYGR  
BFFLLVTSADVVLHQBYLNATALFAYSNFVNAQAVNSRAYSAYNYYPVVSFGR  
TFEQFATSSNVQNKYLNSTIILGFSEILRKAQVSDTKHMRFGVHSFGR  
YFFBMVKDPVHVGEBKYLNSAVLAFSKLLRLAAVDSBAVR-RYPVHVYGR  
TFFELVKHPEVVSQPIILRTTSVYTFTKLVRYALVNPKTVHNRYPVHTFGY  
BFFLLTSTAVQHQBTLNATALIAFSDFLNRAHVNNQSALNYYPVNSFGR  
FLFEMTKDPVFKNMTYVNTSLVLAFASEVIHQVEM-----  
BYFLLVTSNAVQHQBLYLNNTALISYCDFLNRAQVNNRSAYNYYPVVSFGR  
AFFELATHPQVQTOTALLNVTAITAFSELLFLSQGNDKSIYKFPVHTTDR  
SFFNFVRSNNVQHQNQLNETALLAFABELCRKADVNARNAHNYYPVHVYGR  
AFNKLVMRDKRVNRQPIVNTSTGLLALATLHRQVH-DAEFSHNNYPVHAFGR  
SFFNFVRSNNVQHQNQLNETALLAFABELCRKADVNARNAHNYYPVHVYGR  
QFFNFARSPAVKDMFLNNSALMAATKLINLQVNNYTAHSYYPHTMYGR

LPD\_N

A7BK94\_Nilaparvata\_lugens  
Q868N5\_Apis\_mellifera  
R4KE43\_Helicoverpa\_armigera  
Q9U5D8\_Plautia\_stali  
O02024\_Riptortus\_clavatus  
D6W7J2\_Tribolium\_castaneum  
D6W721\_Tribolium\_castaneum  
B\_tabaci\_Asiaticus  
BAG84131\_Tetranychus\_urticae  
ADU04394.1\_B\_tabaci\_Q  
Q16927\_Aedes\_aegypti  
GOETK0\_Nilaparvata\_lugens  
Q9BPS0\_Periplaneta\_americana  
E0VES2\_Pediculus\_humanus\_corporis  
B0W351\_Culex\_quinquefasciatus

L-TSKHDQSLHQEYMPYLEBKLSAFEKGDSSQKIIVYIQALGNTAHPRLI  
L-TSKHDNSLYDEYIPFLERELRKAHQEKDSPRIQTYIMALGMI GEPKIL  
L-ARRNDRFVLDLILPRLSEKLLQCAIEKQEWRSRAQVYIKAIGNLGHREIL  
E-ALNHFAVVIEKYPYFQGLRKAQVQKGDSSIQIQVYIRALANMGHPTVW  
N-SQBHRQAVPKYIPWLQERLRAVSRGDSIKAQVYIRALGNTHAPKIL  
FNTAQGWFFYVKKVPIYLSQKLDEAISNADTKQIHLYIRALGNVGHQOIL  
FRTRRQBQYVKKVPIPHLTRKLNBAINSADTKQIHLYIRALGNVGHQOIL  
V-LPEHAKAVAHQYLPYYEQNLKRAVANGDSRKIQAYIRAIIGNFAHPKIL  
-----SMDCSQSQKFAVTVK--GQAGKRTV-  
V-LPEHAKAVAHQYLPYYEQNLKRAVANGDSRKIQAYIRAIIGNFAHPKIL  
L-ADADYKIIIEBKIVPWFHQLRBAVNEGDSVKIQVYIRSLGNLGHQPIL  
L-TSKHQSLHQEYMPYLEBKLSAFEKGDSSQKIIVYIQALGNTAHPRLI  
M-VPKNFSARVKEYIEYFANKLKNVAVKDKDSHKIQVYIRALGNTHADII  
L-TRLDLDTVTDTYVYLAQQLQAVKEGDSKTKVQTYVVLGNVAHPKIL  
L-ADSKYKIVAHKAVPWLHQLREAVQEADESRIQVYIRAIIGNLGHPEIL

O76823\_Blattella\_germanica --HQVRDLKIKSVYIPYLVQEFDDAVKENNSIKIQLYTHALGVGTGNTHTLL  
 Q7PQM2\_Anopheles\_gambiae L-ADADYKIVAHKVVWFAHQLRBAVKAGDSVKVQVYIRCLGHLGHPEILL  
 UPI000258E3A9\_Megachile\_rotundata P-SSEQYLDIVNKYIPYLVQVQLKKAVIDDDDSARIQTYIYVALGTIGMYEVL  
 ADU04392.1\_1\_B\_tabaci\_B V-LPEHAKAVAHQYLPYYEQNLKRAVANGDSRKIQAYIRAIIGNFAHPKILL  
 Q9U8M0\_Periplaneta\_americanana M-VERNYNA-TNDFIDYLGKQLHAAMADGNRPKIQVIRALGNTGNKRILL  
 ADU04393.1\_B\_tabaci\_EHJ-II V-LPEHAKAVAHQYLPYYEQNLKRAVANGDSRKIQAYIRAIIGNFAHPKILL  
 Q27309\_Bombyx\_mori L-TKHDAFVLEBILPTLAADLKATVEYKDSKAQVYIQAIGNLGRHRIIL

LPD\_N

A7BK94\_Nilaparvata\_lugens KTFEPYLEGKKSASRFQRLLMVASLYQMTRVHPTTARAVLYRIYKKNPGEA  
 Q868N5\_Apis\_mellifera SVFEPYLEGKQQMTVVFQRTLMVGSLSGKLTETNPKLARSVLYKIYLNMTMEB  
 R4KE43\_Helicoverpa\_armigera QVFPYLEGRIQVPTTYLRVQMVVQLRSLAHQKDKYVRAVLYSILRNTAEB  
 Q9U5D8\_Plautia\_stali AGFEPYLEGKQIPVTDQRLVMIAYLGDMIKVBHNTARSILYKIQNEBGDV  
 O02024\_Riptortus\_clavatus AVFEPYLEGKSQISEFQRLSIIASLDEMTRTHPNLARDVLYRIYQNTAEK  
 D6W7J2\_Tribolium\_castaneum QSFKPYLEGTKKASHFQRTLMVVALDKLAKSNPQVARSVLYKIYQNAHDE  
 D6W721\_Tribolium\_castaneum EAFEPYLEGQKKASHFQRLVLMVVALDRLVEANPRVARSVLFKIYQNPSEY  
 B\_tabaci\_Asiatic EVFEPYLEGKVPISNFCQRTVMVLSLNEARVYVPLARNVLFKIYQNTQEN  
 BAG84131\_Tetranychus\_urticae -----RVYTS-----  
 ADU04394.1\_B\_tabaci\_Q EVFEPYLEGKVPISNFCQRTVMVLSLNEARVYVPLARNVLFKIYQNTQEN  
 Q16927\_Aedes\_aegypti SVFEPYLEGTIQITDFQRLAIMVALDNLVIYYPSSLARSVLYRAYQNTADV  
 G0ETK0\_Nilaparvata\_lugens KTFEPYLEGKKSASRFQRLLMVASLYQMTRVHPTTARAVLYRIYKKNPGEA  
 Q9BPS0\_Periplaneta\_americanana RHFEPLYLGRBSVSTHERVTMVFCLDFVKTQPSVAQYILLRLEFENVGET  
 E0VE52\_Pediculus\_humanus\_corporis QVFPYLEGKQPMDFQRTLVVTSLSGKLAVHHPKVARTVLYKVVYNTTGEV  
 B0W351\_Culex\_quinquefasciatus NVFEPYLEGKIPVTNFCQRFIVMSLDRLVENFPKLAARTVLYRVYQNNADV  
 O76823\_Blattella\_germanica HYLRPYIIQLKTIHQRLFMVQSLERVVENHPKRLVIDLLLSLYLDQNEH  
 Q7PQM2\_Anopheles\_gambiae NVFEPYLEGKIPVTHFQRLAFIVALDRLVENYPRKARSVLYFKVYQNTQDA  
 UPI000258E3A9\_Megachile\_rotundata PVFEPFLTGREKMTAFQKTLILASLSNFVANHPKALPGLKQIYMNTTES  
 ADU04392.1\_1\_B\_tabaci\_B EVFEPYLEGKVPISNFCQRTVMVLSLNEARVYVPLARNVLFKIYQNTQEN  
 Q9U8M0\_Periplaneta\_americanana NYLEPYLERKKNATEFERLLMVTSLDILAEINPELARQVLYNVYINIGEN  
 ADU04393.1\_B\_tabaci\_EHJ-II EVFEPYLEGKVPISNFCQRTVMVLSLNEARVYVPLARNVLFKIYQNTQEN  
 Q27309\_Bombyx\_mori KVFPYLEGKVEISTYLRTHTIVKNLKTLAKLRDRSVRAVLYSILRNTAEB

LPD\_N

A7BK94\_Nilaparvata\_lugens AELRVAALHLLANANPSAAMLQORMAQQTHWEQSKEVISATQSFIKSAARM  
 Q868N5\_Apis\_mellifera HEVRCATAVFLMLKTNPPSLMLQORMAEFTKLDTRNQVNSAVKSTIQSLMKL  
 R4KE43\_Helicoverpa\_armigera YEVRVAAILNIFMAHPTAEMMQVMAQMTNEDPSVQVRSALKSGIVSAADL  
 Q9U5D8\_Plautia\_stali PAIRVAAVMQLMKTNPASLLQORMAEHTNYDHSBHVNAAVKSAIESAANG  
 O02024\_Riptortus\_clavatus SEIRAAAVRQLMRTNPPAQMLQORMADFTNYDHSQVNAAVKSAIESAAAC  
 D6W7J2\_Tribolium\_castaneum DQVRVAAVYQLMKSQPSAAMLQORMAYTNTVDTSDNQVNAAVKSIIESACEL  
 D6W721\_Tribolium\_castaneum EQVRVAAVYQLMRTKTPSAMLQORMAYTNTVDTSDVNAAVKSSIEFAADL  
 B\_tabaci\_Asiatic QEVRVAAVFLIFGTNPSAQTLORMAQFTYEDQDQVNAAVSSAIRNAAKK  
 BAG84131\_Tetranychus\_urticae -----  
 ADU04394.1\_B\_tabaci\_Q QEVRVAAVFLIFGTNPSAQTLORMAQFTNEDQDQVNAAVKSALENAAKA  
 Q16927\_Aedes\_aegypti HEVRCAAVHLLMRTDPPADMLQORMAEFTHEHDPQLVRAAVKSAIETAALA  
 G0ETK0\_Nilaparvata\_lugens AELRVAALHLLANANPSAAMLQORMAQQTHWEQSKEVISATQSFIKSAARM  
 Q9BPS0\_Periplaneta\_americanana QEIRVAALYLLMKTQVSAELFQRLAEYTKFDKNHQVVSQVSAIRSAAKV  
 E0VE52\_Pediculus\_humanus\_corporis HQVRVAAVYNLMKTVPVPSMLQORMAQFTHEDPSTQVRSVAVKSAIESAALL  
 B0W351\_Culex\_quinquefasciatus DEVRCAAAAMLMLRTSPPVAMLQORMAEKTDENNSPQVLSAQSLIESAANT  
 O76823\_Blattella\_germanica ADIRVEALFLMLKADPSIHVLKMWAELEHTESNQVLSASQSAIKSAANV  
 Q7PQM2\_Anopheles\_gambiae HEVRCAAVYLLIRTKPPVYMLQORMAEQTHYDPSYVRAAVKTALESASEA  
 UPI000258E3A9\_Megachile\_rotundata QEVRCAALFLIPMTNPPLEVLREIVQFSNNDSSKQVKSQVAVKSTLQGLKHL  
 ADU04392.1\_1\_B\_tabaci\_B QGVRVAAVFLIFGTNPSAQTLORMAQFTNEDQDQVNAAVKSALENAAKA  
 Q9U8M0\_Periplaneta\_americanana HELRCASVILLMRTQPPAAMLQORMAEFSNIDPVKQVVSQVSAIRSAANL  
 ADU04393.1\_B\_tabaci\_EHJ-II QEVRVAAVFLIFGTNPSAQTLORMAQFTNEDQDQVNAAVKSALENAAKA  
 Q27309\_Bombyx\_mori YPVRVAAIQSFIFISHTGEMMQAMAEHTENDPSVEVRAVLYKSAIILSAABL

DUF1943

A7BK94\_Nilaparvata\_lugens DQNPNSIELARNAQAAVDMLNPNBYGSLSKNPLSSFVIDNID-KSYESQ  
 Q868N5\_Apis\_mellifera -KSPWVKDLAKKARSVNHLHLLTHHEYDYELSRGYIDEKILENQN-IITHMI  
 R4KE43\_Helicoverpa\_armigera -KDPBFWHLRSRTAQAVRHIVTKENLGTTRYSNKFFEDNYVNEDE-QGSFRA  
 Q9U5D8\_Plautia\_stali -DEFYAYPELVRNARSAANLLTPKNYGFQYSQNFIKSYIAKEHDTLEYQHY  
 O02024\_Riptortus\_clavatus TDSVDQQLVNNARAANLTPKNYGVQYSKTHLKSHNVEEQN-LQYQCH  
 D6W7J2\_Tribolium\_castaneum -QGPRYEKIRISAAYSAPKLLTSQDFGVQHSNGNLSRFSVEQEMR-SEYLOK  
 D6W721\_Tribolium\_castaneum -EAPHYRFRQAAHSAKPLLTSKQYGVQYSQGYLRNYITKESH-SLFEQN  
 B\_tabaci\_Asiatic -SAGIREBELABAAQSAVDLLNPKTYGLQFSKKWLRDYIVKBEEN-LAYSVY  
 BAG84131\_Tetranychus\_urticae -----LQNY-----  
 ADU04394.1\_B\_tabaci\_Q -HSESRQELAQAAQSAIALLSPKAYGLQYSKKWLRDYIVKBEEN-LAYRVS  
 Q16927\_Aedes\_aegypti DDYDEDSKLAINAKAAINFLNPEVSIQYSFNHIRDYALENLE-LSYRLE  
 G0ETK0\_Nilaparvata\_lugens DQNPNSIELARNAQAAVDMLNPNBYGSLSKNPLSSFVIDNID-KSYESQ  
 Q9BPS0\_Periplaneta\_americanana -EGPYKKBETAKNAQAAVKILSSKPYDDSYSKSFI LNRYRREID-VGYSRL  
 E0VE52\_Pediculus\_humanus\_corporis -KTKTNFQLRKNAQAAVNMLVPQVYGVQYSRLNLTDLVQGLH-LGYTQT



B0W351\_Culex quinquefasciatus DEFD D D S E L A Q N A R A A V K M L T N P N Y G L Q Y S S A H F R Q Y A M K E L D - I S Y R L Q  
 O76823\_Blattella germanica - E G D I Y S E M R R K A K A V E H L L S T R N M D V S Y S K S Y L Y G Y K S K K I N - Y D S L Y N  
 Q7PQM2\_Anopheles gambiae D E F D D D Y E F S Q N A Q A A V K H L N P R D F S L Q Y S G T F L R D F A F K E L E - L S Y R M Y  
 UPI000258B3A9\_Megachile rotundata - S D P E W Q S L A K N A Q A A L K L L D S K D Y D P L K S H E F I F N K - M K E E N - L F T N T L  
 ADU04392.1\_1\_B\_tabaci\_B - H S E S R Q E L A Q A A Q S A I A L L S P K T Y G L Q Y S K K W L R D Y I V K E E N - L A Y R V S  
 Q9U8M0\_Periplaneta americana - K E P G N L N L A R A A R S A V N I L N P M S M D I A Y S N D I L S S N M I Q D M D - L G Y K D N  
 ADU04393.1\_B\_tabaci\_SHJ-II - H S E S R Q E L A Q A A Q S A I A L L S P K T Y G L Q Y S K K W L R D Y I V K E E N - L A Y R V S  
 Q27309\_Bombyx mori - Q H P R N F Y L S R T A Q A A R Y L V T N E E F G Y Q H S F K F I D D S Y D E D N D - I G - T F V

DUF1943

A7BK94\_Nilaparvata lugens L S S I G S V D S I I P S S V F V N F M A N D G G Y K H Q V F H H S A M F S S V N D L L E L V N T Q  
 Q868N5\_Apis mellifera L N Y V G S E D S V I P R I L Y L T W R S S N G D I K V P S T K V L A M I S S V K S F M E L S L R S  
 R4KE43\_Helicoverpa armigera V S Y I G G D S K A M P K Y Q T Y S W R D Q I S G W - - G F D T I G A S F S D A Q E I V D F L K Q M  
 Q9U5D8\_Plautia stali F T Y I K G L D G I Y P S S V L Y N L Q R K I G G Y V H E P Q T M S F M S S S S E B L L N H F F G Q  
 O02024\_Riptortus clavatus C S S I Q S Q D S S L P S S L M Y E V Q Q S V G G Y H R D P H K F Y F M T S S S E Q A I N L M R Q T  
 D6W7J2\_Tribolium castaneum F N Y L V G E D S V L P K G I N Y Y L Q G R F G G V R R F V V D M Q S M V S S I E D L I N V F E Q Q  
 D6W721\_Tribolium castaneum L Q M L G G E D H A V P R G M K Y L L E K Q F G G V Y Q V I N A H A M V S S I E D L V S V F Q Q Q  
 B\_tabaci\_Asiaticus A D T I Q G S D S L I P N Q Y Y A A F F R H V G G F N K R V A S F R A F A S S A S D L Y D R V A D S  
 BAG84131\_Tetranychus urticae - - - - - - - - - - - - - - - - - - - - - - - - - - - - - - - - - - - - - - - - - - - - - - - - -  
 ADU04394.1\_B\_tabaci\_Q A D M I Q S E D S L I P N Q V Y V A L H R Y L G G F A C R V A S F R A M T S S A S D L V E K I Q E Q  
 Q16927\_Aedes aegypti Y G E I A S N D H R Y P S G L P Y H L R Q N F G G F K - K Y T S F Y Y L V S S M E A F P D I F K K Q  
 G0ETK0\_Nilaparvata lugens L S S I G S V D S I I P S S V F V N F M A N D G G Y K H Q V F H H S A M F S S V N D L L E L V N T Q  
 Q9BPS0\_Periplaneta americana Y N Q I G S R D S F M P K S V F Y K L V N I I D G D R D Q A K F G G A V S S V R D V I D F I R Q Q  
 B0VE52\_Pediculus humanus corporis L Q Y V G S K D S L I P S S V F Y K V L G N V N T Y K T T L L K V S S M V S S V Q A V T E F L Q N S  
 B0W351\_Culex quinquefasciatus A G Q I A S D N H P V P T G A W L H W H E N L G L K - R L S S Y H Y I V S N M D A L F D L L D N K  
 O76823\_Blattella germanica L N Y I G S V D S I I P S S V F V N F M A N D G G Y K H Q V F H H S A M F S S V N D L L E L V N T Q  
 Q7PQM2\_Anopheles gambiae F S Q I A A D D H Y V P S G F F H L R K N M G L K - R F S T F Y Y L I S S M E T F F D L L D K Q  
 UPI000258B3A9\_Megachile rotundata L N Y I G S D N S P I P T I Y L A T I L Y D G N F K G S P V E L M T M I P N M D S L I D A L I P S  
 ADU04392.1\_1\_B\_tabaci\_B A D M I Q S E D S L I P N Q V Y V A L H R Y L G G F A C R V A S F R A M T S S A S D L V E K I Q E Q  
 Q9U8M0\_Periplaneta americana M A H V G S S D S I I P N T I L R K F N R Y A G G Q A E S D I N F S E M V S S V K Q L L K A L R N P  
 ADU04393.1\_B\_tabaci\_SHJ-II A D M I Q S E D S L I P N Q V Y V A L H R Y L G G F A C R V A S F R A M T S S A S D L V E K I Q E Q  
 Q27309\_Bombyx mori I S H I G S E D S L L P K D P K I V T N S K G A W E R N T I E - - A S F S S A E R F L D Y L R D S

DUF1943

A7BK94\_Nilaparvata lugens F K - - - - - - - - - - - - - - - - - - - - - - - - - - - - - - - - - - - - - - - - - - - - - - - - -  
 Q868N5\_Apis mellifera V K - - - - - - - - - - - - - - - - - - - - - - - - - - - - - - - - - - - - - - - - - - - - - - - - -  
 R4KE43\_Helicoverpa armigera M Y - - - - - - - - - - - - - - - - - - - - - - - - - - - - - - - - - - - - - - - - - - - - - - - - -  
 Q9U5D8\_Plautia stali L G - - - - - - - - - - - - - - - - - - - - - - - - - - - - - - - - - - - - - - - - - - - - - - - - -  
 O02024\_Riptortus clavatus I A - - - - - - - - - - - - - - - - - - - - - - - - - - - - - - - - - - - - - - - - - - - - - - - - -  
 D6W7J2\_Tribolium castaneum T K - - - - - - - - - - - - - - - - - - - - - - - - - - - - - - - - - - - - - - - - - - - - - - - - -  
 D6W721\_Tribolium castaneum T E - - - - - - - - - - - - - - - - - - - - - - - - - - - - - - - - - - - - - - - - - - - - - - - - -  
 B\_tabaci\_Asiaticus F Y - - - - - - - - - - - - - - - - - - - - - - - - - - - - - - - - - - - - - - - - - - - - - - - - -  
 BAG84131\_Tetranychus urticae - - - - - - - - - - - - - - - - - - - - - - - - - - - - - - - - - - - - - - - - - - - - - - - - -  
 ADU04394.1\_B\_tabaci\_Q F T - - - - - - - - - - - - - - - - - - - - - - - - - - - - - - - - - - - - - - - - - - - - - - - - -  
 Q16927\_Aedes aegypti Y N T K Y F A D Y Y K S A D Y S T N Y Y N F D K Y S K Y Y K Q Y Y Y S K D S E Y Y Q K F Y G O K K D  
 G0ETK0\_Nilaparvata lugens F K - - - - - - - - - - - - - - - - - - - - - - - - - - - - - - - - - - - - - - - - - - - - - - - - -  
 Q9BPS0\_Periplaneta americana F K - - - - - - - - - - - - - - - - - - - - - - - - - - - - - - - - - - - - - - - - - - - - - - - - -  
 B0VE52\_Pediculus humanus corporis F T - - - - - - - - - - - - - - - - - - - - - - - - - - - - - - - - - - - - - - - - - - - - - - - - -  
 B0W351\_Culex quinquefasciatus V M - - - - - - - - - - - - - - - - - - - - - - - - - - - - - - - - - - - - - - - - - - - - - - - - -  
 O76823\_Blattella germanica Y K - - - - - - - - - - - - - - - - - - - - - - - - - - - - - - - - - - - - - - - - - - - - - - - - -  
 Q7PQM2\_Anopheles gambiae Y D S Y N K H Q B Y K S S D Y Y Y K Y K Q Y P H L P K D Y F S Q Y N K N H K Y N D Y Y E Q F G N  
 UPI000258B3A9\_Megachile rotundata D K - - - - - - - - - - - - - - - - - - - - - - - - - - - - - - - - - - - - - - - - - - - - - - - - -  
 ADU04392.1\_1\_B\_tabaci\_B F T - - - - - - - - - - - - - - - - - - - - - - - - - - - - - - - - - - - - - - - - - - - - - - - - -  
 Q9U8M0\_Periplaneta americana L K - - - - - - - - - - - - - - - - - - - - - - - - - - - - - - - - - - - - - - - - - - - - - - - - -  
 ADU04393.1\_B\_tabaci\_SHJ-II F T - - - - - - - - - - - - - - - - - - - - - - - - - - - - - - - - - - - - - - - - - - - - - - - - -  
 Q27309\_Bombyx mori V F - - - - - - - - - - - - - - - - - - - - - - - - - - - - - - - - - - - - - - - - - - - - - - - - -

DUF1943

A7BK94\_Nilaparvata lugens H N N R N S N N E W T A E N V L K A L N I Q K D Q A E Q L E G N F F L T M L G G K R A F A I N N H T  
 Q868N5\_Apis mellifera - - - D R B T I I S A A E K I A B E L K I V P E B L V P L E G N L M I N N K Y A L K F F F P D K H I  
 R4KE43\_Helicoverpa armigera - - - - - A N H R Y T A E K I S E M L K I K R N P Q S P L E G A F F F N I A N Q E R F F S F D E S D  
 Q9U5D8\_Plautia stali Q Q K Q G H H S D Y T Y Q K I G B I L N G Q Y D D P V Q V E G N F F S F L G S P R F F A F D N H T  
 O02024\_Riptortus clavatus W S R N Q H G S E Q S Y E N I L R S I H L H T D E P V Q V E G N I L V S G L G G K E F F T F D N H T  
 D6W7J2\_Tribolium castaneum - - - Q S A N T K W S S E H T A N L F N M Q N E Q R E Q L E G N L Y F H V D A L Q K M W S F D N Q T  
 D6W721\_Tribolium castaneum - - - Q S V N Y P W S S E N I A K L L H L Q N E Q R E Q L E G S L Y L Q M G A L Q T I F S F D N H T  
 B\_tabaci\_Asiaticus - - - - - E K F S K Y S A B E I F K N F N F K A D Y P K E L E A Y F Q Y Y F L G S K Q Y S F I N E B I  
 BAG84131\_Tetranychus urticae - - - - - - - - - - - - - - - - - - - - - - - - - - - - - - - - - - - - - - - - - - - - - - - - -  
 ADU04394.1\_B\_tabaci\_Q - - - - - M N Q Q F S A E Q I F R Q F N I K P D Y P Q E V E A L L Q Y T V F G A K R W A F F D E E F  
 Q16927\_Aedes aegypti Y Y N D K E P F K F T A P R I A K L L N I D A E B A E Q L E G Q L L F K L F N G Y F F T A F D N Q T  
 G0ETK0\_Nilaparvata lugens H N N R N S N N E W T A E N V L K A L N I Q K D Q A E Q L E G N V F L T M L G G K R A F A I N N H T  
 Q9BPS0\_Periplaneta americana S K Y A E D D D I W D L R E I A N L L E M E E E N V D P L E G N V H Y D Y F G A Q R F F T L N K T S

B0V52\_Pediculus\_humanus\_corporis ----HGDAYTVEKIKTKLLNVEQLVKEQVEGNEFNRYRVGNLHRFFVYDNDHT  
 B0W351\_Culex\_quinquefasciatus KQDNKAEQKQWSTGRIAKLLNIDPEDVEQVVGQLWLBIFNAPHLIAFDNNT  
 O76823\_Blattella\_germanica ---KDNGSPDTPKTLVKF-----VEGNLKYFNMIGVQKFWAFDNTT  
 Q7PQM2\_Anopheles\_gambiae -KNQEBEQKWSSTRIAKLLNIDPEBABELGQFMFOIENGERFFAFNNQT  
 UPI000258E3A9\_Megachile\_rotundata ---RSLVKMATEKIAEBLNIVGDIPVLLGNGFLWRTKFLSRFIPYDENT  
 ADU04392.1.1\_B\_tabaci\_B ----MNQQFSAEQIFRQFNKIPDYPQEVVEALLQYTVFGAKRWAFDDEEF  
 Q9U8M0\_Periplaneta\_americana ----RRPEVADRRFENIPPIIIDIAAPPLGNNMLRLWLGNDRRFFSYDKND  
 ADU04393.1\_B\_tabaci\_EHJ-II ----MNQQFSAEQIFRQFNKIPDYPQEVVEALLQYTVFGAKRWAFDDEEF  
 Q27309\_Bombyx\_mori ----DRAHKYSAEKIAKLLNKNDBEEPLASFYVDPMNNQRLFSFSESD

DUF1943

A7BK94\_Nilaparvata\_lugens MRRSPSIFKBAEQKLKHT-SFNLTFQFYSKNTMKVAFPTPMGLPFVYTSV  
 Q868N5\_Apis\_mellifera LDKLPTLISNYIEAVKEG-KFMNVNMLDYESVHSFPTETGLPEFVYTFNV  
 R4KE43\_Helicoverpa\_armigera LIRLVQDVMEYMKLEQGVVDKHYTKVFNARQVSVMPFVASGMPIFYKYKE  
 Q9U5D8\_Plautia\_stali IEQIPQYIKHIEQKQLQKGLNFHETKYNNQYSVEIGFPLATGVVPIYSYNE  
 O02024\_Riptortus\_clavatus IEQIPQYFNSINIEKLDKKSIVQHTKYNNQYSLEIGFPSAMGLPFVYHLDV  
 D6W7J2\_Tribolium\_castaneum IENLLQIVRKCQDLQNGKHIDYNKMSVNYETALSFPASAWGLPLIYTFDV  
 D6W721\_Tribolium\_castaneum MENLPELVRRKWEDEFQRNKHYAYSKMMIAQESSLALPTVLGLPFIYTYDR  
 B\_tabaci\_Asial FNQIPRDLBSALNKAANGYSFNNTKIFYNDFALTIGFPATGLPFSYTIKL  
 BAG84131\_Tetranychus\_urticae -----YKLL--  
 ADU04394.1\_B\_tabaci\_Q FNQIPRRLNDALSKVQNGQSFNSTKFYNDISLSLAFPTATGLPFSYTLKV  
 Q16927\_Aedes\_aegypti IENLPHKMRHLFENLEDGYAFDVTKFYQQQDVVLAFLATGFPIYTLKA  
 G0ETK0\_Nilaparvata\_lugens IEKIPSIFKBAEQKLKHT-SFNLTFQFYSKNTMKVAFPTPMGLPFVYTSV  
 Q9BP90\_Periplaneta\_americana FE-FREELKKYFKKKPQIT---NINKLYNRMELKVGYPNVMGVPEFTFKR  
 B0V52\_Pediculus\_humanus\_corporis IETLTOFLNKYTQKTGGQLAYNTQKFFTNYEITLALPTTTGVLVYTLST  
 B0W351\_Culex\_quinquefasciatus IDELPRVIKMKFDLEVNWSVNI TKVYQQGLVTVAMPLETGFPEFTSTQS  
 O76823\_Blattella\_germanica FSNASAVIQEFLKTYKKPTNFNHTKLSSSSSITLTLPCAMGLPAYFKMNS  
 Q7PQM2\_Anopheles\_gambiae IEQFPSLVKKYFEDFEDGFAYNMTKFYQNVVTMAFPLATGLPFHYSLKE  
 UPI000258E3A9\_Megachile\_rotundata VRNLPNKVVVEHLTARKDG-AFHNTHILNLHEMMIDDTDTGLPFVYSLCB  
 ADU04392.1.1\_B\_tabaci\_B FNQIPRRLNDALSPKVQNGQSFNSTKFYNDISLSLAFPTATGLPFSYTLKV  
 Q9U8M0\_Periplaneta\_americana IKQLFRNYNAAALPLADMHMLDDMKVYNQKSLAIAFPNALGLPSLFTIDV  
 ADU04393.1\_B\_tabaci\_EHJ-II FNQIPRRLNDALSKVQNGQSFNSTKFYNDISLSLAFPTATGLPFSYTLKV  
 Q27309\_Bombyx\_mori LQQLSQYISEYMKKVESGAEKHYTKVYNQDQVSI MPFVASGMPIFYKYKE

DUF1943

A7BK94\_Nilaparvata\_lugens PTMVYVGGETKVN SHPDLA-----NGNNNFVNIPQYINISADIEAVY  
 Q868N5\_Apis\_mellifera IKLTKTSGTVQAQINPDFA-----FIVNSNLRLETF  
 R4KE43\_Helicoverpa\_armigera PIVIH IQSKAKGKMLDRDQ-----TRKYL TSTMDKELQIT I  
 Q9U5D8\_Plautia\_stali PTLFYADVBAKGHLLQBOG-----KDEYYQVVPYKASSEBGTYKFTV  
 O02024\_Riptortus\_clavatus PTLASVSGKWSGQVELLQQH-----QKEQNEKYSIPVKGQVHGDFEFVY  
 D6W7J2\_Tribolium\_castaneum PTLVHIESEMQASANPSVY-----SQGLQQPBTVDLEYKINAFV  
 D6W721\_Tribolium\_castaneum PALIRVEGNVKVE TNPHIS-----SGDSLKKPDNVNVDFDIHAVI  
 B\_tabaci\_Asial PTLLENFGGEVKAQVQGFKA-----DNNKFRIPBAVNVTAADIVTY  
 BAG84131\_Tetranychus\_urticae -----  
 ADU04394.1\_B\_tabaci\_Q PTLVQAGGEVQARVQGHNS-----NNNNNLFRIPEAVNVTABIEIVY  
 Q16927\_Aedes\_aegypti PTVKFEVDASAKTHPQVYKMPAGHPETENDDFYMPQINGSVDVNLLY  
 G0ETK0\_Nilaparvata\_lugens PTMVYVGGETKVN SHPDLA-----NGNNNFVNIPQYINISADIEAVY  
 Q9BP90\_Periplaneta\_americana PTLVTKLTAKTFIMBLKPCD-----HGKPHKFRIFNVSTSDVSVFY  
 B0V52\_Pediculus\_humanus\_corporis PVYIGIKGKVQTDVPELRQ-----TQKGYQVPKTLGVTTNVEVTV  
 B0W351\_Culex\_quinquefasciatus PTLVKLEVDASAE TPNMARPKPAGHPENGNDEHIIHPLSANVTADVNVVY  
 O76823\_Blattella\_germanica PSLWKYNGEFSIQTDAK-----TDVPMSLENFMNITGSINLMF  
 Q7PQM2\_Anopheles\_gambiae PTLMKFEFESATYTPSIFIKTPTGYPEKENDDFIHMFRWFNGSADVNMAF  
 UPI000258E3A9\_Megachile\_rotundata CTLHLKLSSTDNYKPFES-----RWFN-----DFQFAI  
 ADU04392.1.1\_B\_tabaci\_B PTLVQAGGEVQARVQGHNS-----NNNNNNNLFRIPEAVNVTABIEIVY  
 Q9U8M0\_Periplaneta\_americana PTVLRANSTFRLLNNTSS-----BSSSIEVLVPWKLGARSETSLTY  
 ADU04393.1\_B\_tabaci\_EHJ-II PTLVQAGGEVQARVQGHNS-----NNNNNNNLFRIPEAVNVTABIEIVY  
 Q27309\_Bombyx\_mori PAVIH FQSKLKGKFSFPSK-----DNKYYE--ANMIKDVQFTY

DUF1943

A7BK94\_Nilaparvata\_lugens SMQSNKSGFMVAPFNHHEYYASVEKNMQFYMA-VQTEANIDLENNEVEFT  
 Q868N5\_Apis\_mellifera SKNVQGRVGFVTPFEBRRHFISGIDSNLHVYAP-LKISLDVNTPKGNMQWK  
 R4KE43\_Helicoverpa\_armigera ARNIDGNVGFMDTLNQLASAGVVRKYQVNVV---VKMSIQMNAAGVLKMK  
 Q9U5D8\_Plautia\_stali SSQKWGKLGFIAPFNQKYLAVVEKNTQFYVVP-FQGLQFNGPBOYFOAT  
 O02024\_Riptortus\_clavatus SAQKSGLMGFVAPFSQNRYYIAGLEKNIHAYVVP-VQAKVBYNPEENKVQAS  
 D6W7J2\_Tribolium\_castaneum SGRVQSOLGFFAFPNHKKRYSAGYDKNFQVVPVQISGKVLNVENKQATLB  
 D6W721\_Tribolium\_castaneum SGRVQTOFCIFTFPDHQRYYSAGYNKFPQLVVP-LNGKMBLNDVQKQLME  
 B\_tabaci\_Asial STKLETKFGFVTFPDHQRYVAGVDKNINFNLP-LKFNVNLDVYNTKABII  
 BAG84131\_Tetranychus\_urticae -----YDVKKDSASLT  
 ADU04394.1\_B\_tabaci\_Q ATELKSELGFVTFPNHHERYVAGLAKNIFVNIP-VKVAANVDIANTKVEFY  
 Q16927\_Aedes\_aegypti HRMVDKVGFTVTFPDHQRYIAGYQKLLHGYLP-FNVELGLDFVKDEYFB  
 G0ETK0\_Nilaparvata\_lugens SMQSNKSGFMVTFPNHHEYYASVEKNMQFYMA-VQTEANIDLENNEVEFT



GOETK0\_Nilaparvata\_lugens MTSPW-AQGLNSNNITVAFNPRQSTSQVAKFTFSYA-----  
 Q9BPS0\_Periplaneta\_american FYYGW-EAQPVFYYDFKLYLDSHNSPAKTVQLKASYD-----NRYTQP  
 B0VE52\_Pediculus\_humanus\_corporis VVFPT-ABATIDNTNVDVYYDSKLS TVQSLVLSATYR-----  
 B0W351\_Culex\_quinquefasciatus LLFPLHASQPCHYHQLNLVYDAQRS PVKNIKLSLQQT-----  
 O76823\_Blattella\_germanica LNYDV-PTKIDIFYNNLTVYYDHEDTKNHAVSFTVTKEQSKFYBTLNPPVQ  
 Q7PQM2\_Anopheles\_gambiae LVYPF-ASETYHYHQFNLYYDAQRTSVKKNVKFVLQHK-----  
 UPI000258B3A9\_Megachile\_rotundata IMFPI-KDKQSEYHKVAVIMDKRSD EGGKPLVLSASY-----  
 ADU04392.1\_1\_B\_tabaci\_B AAFPW-AEKTIQYNNFDVYYDPARSAAKSAKFALNYA-----  
 Q9U8M0\_Periplaneta\_american LAFIW-ARRTINNHNVTLSIDEDQSTTNAVRIEGKYA-----S  
 ADU04393.1\_B\_tabaci\_EHJ-II AAFPW-AEKTIQYNNFDVYYDPARSAAKSAKFALNYA-----  
 Q27309\_Bombyx\_mori LASLL-TQEDIALTHFNLLKHLCKQS QSKALTITAYYD-----

A7BK94\_Nilaparvata\_lugens -DNSDDNNNSHSGHDSNNSNNNNNNNRADYSDAQPSSTTGQTTLMLSHLPL  
 Q868N5\_Apis\_mellifera -----SKVMTRPDTDSENWTFPKMMAVBPDKQ-----  
 R4KE43\_Helicoverpa\_armigera -----QLFNQKQSGELGQADKRRKDV  
 Q9USD8\_Plautia\_stali V-----EQGGQHKKNAKLMNARGKRINAGGSNLAQ-----  
 O02024\_Riptortus\_clavatus NEYGNKGGARMTSKFKKANIRDRSASSARDNLAVPSSBQ-----  
 D6W7J2\_Tribolium\_castaneum -----HTYNSNLNRQPAPEMSSRYQ-----  
 D6W721\_Tribolium\_castaneum -----YKYQSTQAQEKNDQITDIPAFADS-----  
 B\_tabaci\_Asia1 -----SKYAAKQADHESRNANTNDAVTSNNK-----  
 BAG84131\_Tetranychus\_urticae -----  
 ADU04394.1\_B\_tabaci\_Q -----NKYANKENNNBEGNSNNNNNNNDAVPSSYQ-----  
 Q16927\_Aedes\_aegypti --FGAPSFEEETGPKHPANRHSYSGNYYESNYAQPFVYS  
 GOETK0\_Nilaparvata\_lugens -ENSDDNNNSHSGHDSNNSNNNNNNNRADYSDAQPSSTA-----  
 Q9BPS0\_Periplaneta\_american EEBBETROHRSKIRRPSASRKRHRSRREBRAPLENLEB-----  
 B0VE52\_Pediculus\_humanus\_corporis -----QVTPTEIKHETDGTGKVFVPT-----  
 B0W351\_Culex\_quinquefasciatus TANBTEDFSSSDIKHPKARHQSEGYNEKNLAQPFVFK-----  
 O76823\_Blattella\_germanica QNLKLSGSKKQKHRNVKSHRIRREYTEDENPAIPKDKQ-----  
 Q7PQM2\_Anopheles\_gambiae QADYDQDFQTADVKKHPKSRHGFSGFYNEYNAYQPFVYY-----  
 UPI000258B3A9\_Megachile\_rotundata -----TLDVEAGTEDANQWTQFVNATSAFSEI-----  
 ADU04392.1\_1\_B\_tabaci\_B -----NKYANKENNNBEGNSNNNNNNNDAVPSSYQ-----  
 Q9U8M0\_Periplaneta\_american KINDVDAGTWTWERSRVERSAKRHRPRPEAQEYDSS-----  
 ADU04393.1\_B\_tabaci\_EHJ-II -----NKYANKENNNBEGNSNNNNNNNDAVPSSYQ-----  
 Q27309\_Bombyx\_mori -----EYYNQONS GILTDATDRNLS-----

A7BK94\_Nilaparvata\_lugens LPTVV-----SRQNEFLRKAAGISGADAMVVDVSARFQDSHGQSNAQY  
 Q868N5\_Apis\_mellifera -ANSK-----TRRQEMMREAGRGIESAKSYVVDVVRVHVPG-ESE--SBT  
 R4KE43\_Helicoverpa\_armigera -PNSE-----ARREMLKRVSAGINNARAQVVDFSATFBG-PQK--QBY  
 Q9USD8\_Plautia\_stali -PSSV-----ENRVDELFTNSYSGIQDARAQVDFASVTFBGGQNK--GQY  
 O02024\_Riptortus\_clavatus ---QREBELLRNVBABIQDAKSHLLDASVTFGGKNNN--AGY  
 D6W7J2\_Tribolium\_castaneum -AAQESW---ERQKEFLKNC SKDIRAVRAHVVDVAIVLFBG-QRI--VKY  
 D6W721\_Tribolium\_castaneum -PE-----KRQQEFVDKLGKYINNPHVVFADATADFG-QYK--VKY  
 B\_tabaci\_Asia1 -PDSE-----ERLNEFVRKSYAGINSATVNAFDFAQFLG-QKE--ADY  
 BAG84131\_Tetranychus\_urticae -----QGG--PDY  
 ADU04394.1\_B\_tabaci\_Q -PDNE-----QRMNQFASRAQSGVQSANIDVIDISAQFFG-QKN--ADY  
 Q16927\_Aedes\_aegypti -PGSQ-----RRYEQFFRNAASGIRNSFVRYDDFGFEBYAPQYK--SEF  
 GOETK0\_Nilaparvata\_lugens -ANSR-----SRQNEFLRKAAGISGADAMVVDVSARFQDSHGQSNAQY  
 Q9BPS0\_Periplaneta\_american -SDTE-----TQREELYDIVLPAVRAGRLLYASVSVAFKGBENVYSKY  
 B0VE52\_Pediculus\_humanus\_corporis -SDVQ-----TRIKQFYEKVTTGVKGARAVCDVFLNVNA-QTP--VEL  
 B0W351\_Culex\_quinquefasciatus -PASQ-----RRQEQLFKNAGAGIRNSLVSVWDLGAEFBGRQNK--AEF  
 O76823\_Blattella\_germanica -PNSH-----PRRQEBYLSKSMALTDGATAVLLDMLTKFBG-PAE--SYF  
 Q7PQM2\_Anopheles\_gambiae -AGSQ-----RRQEQFMRNAGAGIRNSDYNVYDFGIVFBGKQK--AEF  
 UPI000258B3A9\_Megachile\_rotundata -RDSE-----QRKIRFLEBAAKGIVLAQAGVLDPHIHPFINBE--VKT  
 ADU04392.1\_1\_B\_tabaci\_B -PDNE-----QRMNQFASRAQSGVQSANIDVIGISAQFFG-QKN--ADY  
 Q9U8M0\_Periplaneta\_american -ANPAIVDRA-DKLEBFLNRAS---GNRVHGLAVRVAFTG-SSD--ATF  
 ADU04393.1\_B\_tabaci\_EHJ-II -PDNE-----QRMNQFASRAQSGVQSANIDVIDISAQFFG-QKN--ADY  
 Q27309\_Bombyx\_mori -PNSE-----TRRAEMVKLVSAGINKARVRVVDLSASFBG-SQD--QNY

A7BK94\_Nilaparvata\_lugens VATVAMANS DASP NARM LFFAS MN PAN-----SDSKAQVC AAA  
 Q868N5\_Apis\_mellifera VETLAWSES NVE SKGRLLGFWRVEMER-----SNADYEVCI GSQ  
 R4KE43\_Helicoverpa\_armigera VLTAAIAKSPVDLKIQSAVFAGRNSV-----QQGDEQINAVVK  
 Q9USD8\_Plautia\_stali AETFABAE SPVSEKSRVLYAYFSASPYQESQ-----YAKAFKAAFHLN  
 O02024\_Riptortus\_clavatus SETTLAHANSPVSEKSRVLYAYFSASPYQESQ-----NTKPFQAAFLD  
 D6W7J2\_Tribolium\_castaneum BSTLAGARSDIDPRGRVLMQMEKDNQ-----HDKPVRVFFAAN  
 D6W721\_Tribolium\_castaneum SATFGVAKSNVDPRQRVFMGYARKVEK-----QNPQVLAIVYQGV  
 B\_tabaci\_Asia1 VCTFAFARS PVABKS RFLFYGHYNTA-----NNKKQCAFBAS  
 BAG84131\_Tetranychus\_urticae VLT-----  
 ADU04394.1\_B\_tabaci\_Q VATLAYARS PVABKARFLFYAGANNA-----NNNKNKVAVDAT

Q16927 *Aedes aegypti* TTTTAFADSPVDKTSRQLYFYASPMFSPQSYPFKDIPFSGKQFQFCATAT  
 G0ETK0 *Nilaparvata lugens* VATVAMANSQDASSNARMLFFASMNPNAN-----SDSKAQVCAAVA  
 Q9BPS0 *Periplaneta americana* EVEGALASSQVNNHISTMLRAHSNDA-----ERKHQYAHVRVN  
 E0VES2 *Pediculus humanus corporis* VGTAFALARSVPVDAPVNLIGYFYKTA-----GNDHYEICYDST  
 B0W351 *Culex quinquefasciatus* VLTFAKASSPVDKERTLVFASASPYIAVG-----SKKQHQACLSLT  
 O76823 *Blattella germanica* TTTVSHATSLVNGSSNYLLFYDQHYE-----EKKRNRQFCLSWT  
 Q7PQM2 *Anopheles gambiae* VTTTAYADSPVDKBERLLMLLSFSPYVSSSAFFBIFPFSGKQFQMCFSAT  
 UPI000258B3A9 *Megachile rotundata* NLTVAWSASNAETKGRFLSRLTIMNQI-----DEVTEFVCAASQ  
 ADU04392.1\_1\_B\_tabaci\_B VATLAYARSVPVABKARFLFYAGANNA-----NNNKNKVAVDAT  
 Q9U8M0 *Periplaneta americana* DLTAAALGLSNVNGSARALVSYISQPAHPADV-----MPRKTBYDLFAA  
 ADU04393.1\_B\_tabaci\_EHJ-II VATLAYARSVPVABKARFLFYAGANNA-----NNNKNKVAVDAT  
 Q27309 *Bombyx mori* VLTGTWGDSPVDSKVQGMFLFAGTKSA-----TQGNQQINAVFA

A7BK94 *Nilaparvata lugens* SNFPNVPLMNFHDAALKANPTSRRISADIAFGAQCNAGGHIHADAKLSQTQBE  
 Q868N5 *Apis mellifera* IMVSPETLLSYDEKMDQKPKMDFNVDIRYGKNCQKGERIDMNGKLRQSPR  
 R4KE43 *Helicoverpa armigera* VTKPEISALNLFLEALKKDVMTYBADIKYGD----GNIHQGNTERTKK  
 Q9USD8 *Plautia stali* FKFPPQVPVFNFKKALESDPTSYVEGQINFNDN--BKYKIAFQGGKFBQTEEB  
 O02024 *Riptortus clavatus* IKDPQLPAFNYQDALNADSTSQVQGGKINMGEOLE--SQITFKGKLERTQE  
 D6W7J2 *Tribolium castaneum* TKIPNTNSLNLKYALEFDPSTSTIQIQGVIEKKSQNDQAINAKLTAKSEEB  
 D6W721 *Tribolium castaneum* SHVRNTNGLNLDYAMEFDPSTSTAYIQGLLRKE--QLRSQVDAHIELSKSEQ  
B\_tabaci\_Asial AEMPVPLTNPAAAMKAEPAKSIYANFKFGESEFENAAKVHFANLQKSSSE  
 BAG84131 *Tetranychus urticae* ---PGKPAI-----  
 ADU04394.1\_B\_tabaci\_Q AYMPNVPLVNAQAQFNADANSRLYVNVKSGENLNDNGAQFQFQANMKQSQBE  
 Q16927 *Aedes aegypti* SEFFPRVPLKFSDFDKYYGDASQYFDFLYGESCQGGAHIAVKGKQKQTKGK  
 G0ETK0 *Nilaparvata lugens* SNFPNVPLMNFHDAALKANPTSRRISADIAFGAQCNAGGHIHADARLSQTQBE  
 Q9BPS0 *Periplaneta americana* VTMPPQVPVIDYRKALEFDPSTSKIQCBEVHFGDTPBKSKSVYFQGGKFBRTDE  
 E0VES2 *Pediculus humanus corporis* FKSTYSPIYDLBHAIQSESKSDLNHVHVKFGNKCDTGAKVVLTKLERTPE  
 B0W351 *Culex quinquefasciatus* BKYPSPVPMNLNYITALQNDVTSBIDLELSFGEKCCAGGAQVSVNGMLRQTDL  
 O76823 *Blattella germanica* VYKPPQVPIMNIIYSAFEFDPNSKVVHAIMNIGKECENGGSAVANIDMLRLSE  
 Q7PQM2 *Anopheles gambiae* NQYPNMPKLNFLNVLNFDKVGSMNWELAYGEKCCGGSHVSMKGLIQSEFP  
 UPI000258B3A9 *Megachile rotundata* LALTPPYFPVYDEVNNTCKIEFDIDIRHGENCQEDNRVNIIGTGRSNE  
 ADU04392.1\_1\_B\_tabaci\_B AYMPNVPLVNAQAQFNADANSRFRYANVKS GENLNDNGAQFQFQANMKQSQBE  
 Q9U8M0 *Periplaneta americana* LSPAPPIINFNAQALEFDPDSNLDAGLSIFTNDKPSGNLRIKAGELQKSEEB  
 ADU04393.1\_B\_tabaci\_EHJ-II AYMPNVPLVNAQAQFNADANSRFRYANVKS GENLNDNGAQFQFQANMKQSQBE  
 Q27309 *Bombyx mori* TTKPEIHSLSFSKPLQSDLRAPFGMHFKYQGS----GEIRVSGSFDRTKK

A7BK94 *Nilaparvata lugens* FQBYAKSRPMAKKCFQLMKEKG-QALEYACQONATKVANMLNNYEIVSVKYD-  
 Q868N5 *Apis mellifera* LKELVGGATSI IKDCVDEDMKRG-NKILRTRCQKAVVLSMLLDEVD ISMEVP-  
 R4KE43 *Helicoverpa armigera* YTELLQKHPLAKLVQEQIANG-NQYQLASHKMLIKAYAPDSLKASVTYK-  
 Q9USD8 *Plautia stali* RKNYVKHSQYSABCLBQMQHD-NYIQPVCLNASLNRNALDKYEFTFKFKQ-  
 O02024 *Riptortus clavatus* RKKEYLQCHPLARACBSQMQRR-NYIQPACLNATLQANFHNRYPVFNQYQ-  
 D6W7J2 *Tribolium castaneum* RKQYLKELPQYKCKQKEMQEG-NYQLPACAMLTAAQANLLDQFSFEMNYH-  
 D6W721 *Tribolium castaneum* RKKEYLQEQEYKCKHQMQEG-NTQLPICAKMGRANLLDTPSFKMKYS-  
B\_tabaci\_Asial RRQFLRNALYKQCESEMERG-QYELPACRNFTVADNRMNIEYVNFNFQ-  
 BAG84131 *Tetranychus urticae* -----  
 ADU04394.1\_B\_tabaci\_Q FRDYFRQSQMYKQCSQQMEQG-EYHMPACRNATVAANRLNEAHFSINFD-  
 Q16927 *Aedes aegypti* YREYLRFSVAKACKEQMANG-YYQFEECQQAIDQAYYYDFDYAIEYK-  
 G0ETK0 *Nilaparvata lugens* FQBYAKSRPMAKKCFQLMKEKG-QALEYACQONATKVANMLNNYEIVSVKYD-  
 Q9BPS0 *Periplaneta americana* RKKFVAESDMAQCLCSAQQNNK-NYLLPACRNVTBEASKLDKYFFKVKYE-  
 E0VES2 *Pediculus humanus corporis* RQQYVQTLPOVQTCCKTEVQOG-NKYTANCRNATLQAGLFDKTYFNKIEY-  
 B0W351 *Culex quinquefasciatus* WRRTLRSIAIGRCKKNQMAEG-YFALPECQONATRLASALDHYTFDIEFK-  
 O76823 *Blattella germanica* HLDYVKNLTVSKLCEHEMRTKRDBVLPACRNSTBRASDLNRVVDINYNL  
 Q7PQM2 *Anopheles gambiae* YRHFLRISBAGQSCKQCMDQG-YFQLPACQONATRQAGYFDQYSFNFYK-  
 UPI000258B3A9 *Megachile rotundata* LKEDINDISVVKCECKKQMEQG-NKLLRACQKAGDKALQVDEBLQSLQSQ--  
 ADU04392.1\_1\_B\_tabaci\_B FRDYFRQSQMYKQCSQQMEQG-EYHMPACRNATVAANRLNEAHFSINFD-  
 Q9U8M0 *Periplaneta americana* RRNAIRSTPAALACMREMANGNLNLPSCRNATBMANRLDRIRLQAKFE-  
 ADU04393.1\_B\_tabaci\_EHJ-II FRDYFRQSQMYKQCSQQMEQG-EYHMPACRNATVAANRLNEAHFSINFD-  
 Q27309 *Bombyx mori* YTTLELNHPLAKQCSQQTTLN-NFYQDSCHKAIVMAHAPDHVEFVSFSQ-

A7BK94 *Nilaparvata lugens* RVSSVFKNVYTSIYSSALAQAAYPYHNNHF--SQNSNPSGKIDLNARFNYS  
 Q868N5 *Apis mellifera* --SDALIALYSQGLFSLSEIDNLDVSLDVS--NPNKAGKKKIDVRAKLNE  
 R4KE43 *Helicoverpa armigera* NVSPMFMNWTSQAYNLLKQLS---WNADV--PMKRVAIDGKLFQDFVQTSY  
 Q9USD8 *Plautia stali* NVPEYFQHLAYKAYSFARYEGYQYQEBEYA--GVKNBPG-QIKFQNFPSA  
 O02024 *Riptortus clavatus* NVPAGVRRAFHSAYSMGRYALYQNNBENIN---TEQNQEGQIQIGVQFEE  
 D6W7J2 *Tribolium castaneum* NIDKVVVNSTYKLYTVLRHYMYPRVSEEDILMENEQVQKD-RLQVKGQFSP  
 D6W721 *Tribolium castaneum* DMDPRVINATYKTYSVLRHFLYPRVBEINIV---EPSSDNHLDIQGQFSP  
B\_tabaci\_Asial NIPBYFKNYTYQAFAPARHMGYQYQSENVV--NPHYKPN-BIEGFFKFSF  
 BAG84131 *Tetranychus urticae* -----

ADU04394.1\_B\_tabaci\_Q KVSDAVKKNYTYQAFAYARHLGYQYQSENF--NPNGQHN-KIDGYFKFSP  
 Q16927\_Aedes\_aegypti DVGSVAKNLTNKFYNYFYQAFYYPYFBSNFT---YHGKSN-YIKAEFBFAP  
 G0ETK0\_Nilaparvata\_lugens RVSSVVEKNNVYYSIALAQAAAPYHSENMFT---SQNSNPSGKIDLNARFNY  
 Q9BPS0\_Periplaneta\_americana NLSEKCRNRNRTYKAYSYLRRHYFFPYITENVY---FQKHN-QFQIDFQLAP  
 E0VES2\_Pediculus\_humanus\_corporis GVPBBLKNYTYRVVNIYTHLAYPYLTEGMP--TQAAQOSKEVEFDVNFPT  
 B0W351\_Culex quinquefasciatus BIPSSVRNMTNKALNWVQSAVITRWBEDCV---SHKKGKGGKAKLKIELS  
 O76823\_Blattella\_germanica KQHBTFKRRVYKVDYFVRTHLYPHVSSEDIIVDNPAQ---FISANFTLKD  
 Q7PQM2\_Anopheles\_gambiae DVSNYAKNLTYYQFFDYARYFTFPYWNEDYF---FQKHN-QFQIDFQLAP  
 UPI000258E3A9\_Megachile\_rotundata GCRRTQRDMBYFFSHLLSSGIIVGTLAELQ---PKVMDGKINLKAKISK  
 ADU04392.1\_1\_B\_tabaci\_B KVSDAVKKNYTYQAFAYARHLGYQYQSENF--NPNGQHN-KIDGYFKFSP  
 Q9U8M0\_Periplaneta\_americana NLSDDLINNTYKAYTWIRYFTQPYVTENIA---QBQNPGRNLINVDVNN  
 ADU04393.1\_B\_tabaci\_EHJ-II KVSDAVKKNYTYQAFAYARHLGYQYQSENF--NPNGQHN-KIDGYFKFSP  
 Q27309\_Bombyx\_mori DMSPQYRNFPSYHTYRLYEYLGWYTBANPL---KLTQNGKMDFKIDFSY

A7BK94\_Nilaparvata\_lugens NLRYPNASINTPFFSANVKNVEV-HHALRPL-----VIFHPSL-----  
 Q868N5\_Apis\_mellifera YLKDADVIVNTPIMDAHFKDKVKL-SDFG--F-----STEDILD-----  
 R4KE43\_Helicoverpa\_armigera VDQTLRFEMTSPSGVLRFDNVLVLI-PKFTPYM-----VSLYYPF-----  
 Q9USD8\_Plautia\_stali DFDYFNVSLVTPVETSRFBENIGL-DRHLRPF-----FVQHPGY-----  
 O02024\_Riptortus\_clavatus NLRSVNLSIAAPGLSSNFNSNVRV-PGMVAVF-----VVYHPRY-----  
 D6W7J2\_Tribolium\_castaneum CLSRVNASVVTYEGKVDFFNNVKV-QDWAKAL----LVSHPVH-----  
 D6W721\_Tribolium\_castaneum DLHAVNFASINSEYGNVQVKNVQV-NKWRDL----FVSPQVF-----  
 B\_tabaci\_Asiatic SFRYANFSPFASPALSAAFDNVPV-NPYFAAI----FAPHPTY-----  
 BAG84131\_Tetranychus\_urticae -----  
 ADU04394.1\_B\_tabaci\_Q KFDFAQFYFNAPSVAASFKNVVPV-HQYVADF-----FAPHPVY-----  
 Q16927\_Aedes\_aegypti YGDYYNASFFGSPSYAFQVQNYPVFNDYSTYFPYFFKYTFPPRYQPYMHR  
 G0ETK0\_Nilaparvata\_lugens NLRYPNASINTPFFSANVKNVEV-HHALRPL-----VIFHPSL-----  
 Q9BPS0\_Periplaneta\_americana EINAVNVSVKAPILNVEFTDVRVYNKYARAL----FSLNPRY-----  
 E0VES2\_Pediculus\_humanus\_corporis DLKVNVLVYLSLTPVGVSTFHSVPV-GEYTRTL----LVSHPVH-----  
 B0W351\_Culex quinquefasciatus RVSHINVTLATENRRIEIEINLPEVENEWMKSL----VLVHPDL-----  
 O76823\_Blattella\_germanica NTRAFNVSIETPVLVSNATSVRL-QSWQSEM----LRMNPRT-----  
 Q7PQM2\_Anopheles\_gambiae YFDYYNASFYGSDRSFAIQNYPIESEYARYF----FSVHPDF-----  
 UPI000258E3A9\_Megachile\_rotundata NMSANFYSVQLPNINVEBNDVNL--DYFED-----SSB-----  
 ADU04392.1\_1\_B\_tabaci\_B KFDFAQFYFNAPSVAASFKNVVPV-HQYVADF-----FAPHPVY-----  
 Q9U8M0\_Periplaneta\_americana DGTALNASVDTALMSITWTNIRL-NRWTRSL----VEPSPQD-----  
 ADU04393.1\_B\_tabaci\_EHJ-II NFDFAQFYFNAPSVAASFKNVVPV-HQYVADF-----FAPHPVY-----  
 Q27309\_Bombyx\_mori FDRTYTVDIASPSSGARMRDMPI-ATMAPGA-----LSFYQPL-----

VWFD

A7BK94\_Nilaparvata\_lugens -----NSLEHLLSSCPTMRTTIT-QHVLISA--RTPSAHSTTR  
 Q868N5\_Apis\_mellifera -----TADBDLLINNVFYEDBT-SCMLDKT-RAQTFDGKDY  
 R4KE43\_Helicoverpa\_armigera -----SMTERFANYSSYQYQP-FCSIDGN-QVRTFSNRSY  
 Q9USD8\_Plautia\_stali -----NQLYYFAPDYFDTKNYA-TCGVDGNGVVTTFNGQSY  
 O02024\_Riptortus\_clavatus -----NTYQLLKSPLYQTEBPQATAVIDGN-KATTFSNRTY  
 D6W7J2\_Tribolium\_castaneum -----HVKSRLGGYALNYBTYKANCMVDS-CAVNTLDNRTF  
 D6W721\_Tribolium\_castaneum -----HARARLQGOALKYD TYRPI CVVDKT-QTSTWDNKTY  
 B\_tabaci\_Asiatic -----TAFDFPMQBTFRSKYQA-ACVADKG-FATTFDNRTF  
 BAG84131\_Tetranychus\_urticae -----RLDMLFPNSKY  
 ADU04394.1\_B\_tabaci\_Q -----SGFDRLMQDTFOAKYQA-ACVADKM-HATTFDNKTY  
 Q16927\_Aedes\_aegypti LPAHKPRNRPPYELSNYEQFAVDRKQPYP--SCSFSND-YFYTFDNKKY  
 G0ETK0\_Nilaparvata\_lugens -----NSLE-LMSYNNYDYP--TCSVSKN-SISTFDNKTY  
 Q9BPS0\_Periplaneta\_americana -----PLLSQVAKTAFPPQYEP-TCVVDYS-KVNTFDNKTY  
 E0VES2\_Pediculus\_humanus\_corporis -----NYVERYQWSAFQYQYKA-YCTIDKA-QTKTFDNQTY  
 B0W351\_Culex quinquefasciatus -----AWNERLASYAYNGEMNP-SCVVPK-YVDTFDGRTY  
 O76823\_Blattella\_germanica -----SFAKRFAKVALPLYKPT-CVVDSS-YINTFDNFTY  
 Q7PQM2\_Anopheles\_gambiae -----DYERMFNYAYRGNYP-SCAVSNK-FVNTFDGKTY  
 UPI000258E3A9\_Megachile\_rotundata -----EKEDBADNSWLMDDVVS-TCVMDLN-RAETFDGKEF  
 ADU04392.1\_1\_B\_tabaci\_B -----SGFDRLMQDTFOAKYQA-ACVADKM-HATTFDNKTY  
 Q9U8M0\_Periplaneta\_americana -----TALDRLAREALPLYEP-TCVLDVS-QAATFDNTTY  
 ADU04393.1\_B\_tabaci\_EHJ-II -----SGFDRLMQDTFOAKYQA-ACVADKM-HATTFDNRTF  
 Q27309\_Bombyx\_mori -----KAYELVANYFTGHQYQP-YCSIDGT-RIHTFSNRSY

VWFD

A7BK94\_Nilaparvata\_lugens PTHADLEGWHVMFASTPKN--FNONSGRYSASNSQSNSRYKYKK-----  
 Q868N5\_Apis\_mellifera PLRL-GPCWHAVMTTPYPRINPDNHNKHLIPKDKS-----  
 R4KE43\_Helicoverpa\_armigera DYEL-SKSWHVVMREBYNKIRGKWD-----  
 Q9USD8\_Plautia\_stali SIDY-EDFTYVLVYALPGEHFESSEDSSE--EYESTYLG-----  
 O02024\_Riptortus\_clavatus PIDL-GNCYHVFAMYAPQGGENRQHESISNIQGG-----  
 D6W7J2\_Tribolium\_castaneum PIDL-SKDVVLLHYVPRRPSPIKNQPYLTVPEQLNQVEGY-----  
 D6W721\_Tribolium\_castaneum PSSF-SNGWTVLLHYVPRRPSSSQNKPYESVQELNLEVESY-----  
 B\_tabaci\_Asiatic PAHF-QNNWYVLLMAYMNRNNYNNNFNQYL---QNKNOHSYRDYNEKRF

BAG84131\_Tetranychus\_urticae  
ADU04394.1\_B\_tabaci\_Q  
Q16927\_Aedes\_aegypti  
G0ETK0\_Nilaparvata\_lugens  
Q9BPS0\_Periplaneta\_american  
E0VE52\_Pediculus\_humanus\_corporis  
B0W351\_Culex quinquefasciatus  
Q76823\_Blattella\_germanica  
Q7PQM2\_Anopheles\_gambiae  
UPI000258E3A9\_Megachile\_rotundata  
ADU04392.1\_1\_B\_tabaci\_B  
Q9U8M0\_Periplaneta\_american  
ADU04393.1\_B\_tabaci\_EHJ-II  
Q27309\_Bombyx\_mori

VWFD

A7BK94\_Nilaparvata\_lugens  
Q868N5\_Apis\_mellifera  
R4KE43\_Helicoverpa\_armigera  
Q9USD8\_Plautia\_stali  
O02024\_Riptortus\_clavatus  
D6W7J2\_Tribolium\_castaneum  
D6W721\_Tribolium\_castaneum  
B\_tabaci\_Asiatic  
BAG84131\_Tetranychus\_urticae  
ADU04394.1\_B\_tabaci\_Q  
Q16927\_Aedes\_aegypti  
G0ETK0\_Nilaparvata\_lugens  
Q9BPS0\_Periplaneta\_american  
E0VE52\_Pediculus\_humanus\_corporis  
B0W351\_Culex quinquefasciatus  
O76823\_Blattella\_germanica  
Q7PQM2\_Anopheles\_gambiae  
UPI000258E3A9\_Megachile\_rotundata  
ADU04392.1\_1\_B\_tabaci\_B  
Q9U8M0\_Periplaneta\_american  
ADU04393.1\_B\_tabaci\_EHJ-II  
Q27309\_Bombyx\_mori

VWFD

A7BK94\_Nilaparvata\_lugens  
Q868N5\_Apis\_mellifera  
R4KE43\_Helicoverpa\_armigera  
Q9USD8\_Plautia\_stali  
O02024\_Riptortus\_clavatus  
D6W7J2\_Tribolium\_castaneum  
D6W721\_Tribolium\_castaneum  
B\_tabaci\_Asiatic  
BAG84131\_Tetranychus\_urticae  
ADU04394.1\_B\_tabaci\_Q  
Q16927\_Aedes\_aegypti  
G0ETK0\_Nilaparvata\_lugens  
Q9BPS0\_Periplaneta\_american  
E0VE52\_Pediculus\_humanus\_corporis  
B0W351\_Culex quinquefasciatus  
Q76823\_Blattella\_germanica  
Q7PQM2\_Anopheles\_gambiae  
UPI000258E3A9\_Megachile\_rotundata  
ADU04392.1\_1\_B\_tabaci\_B  
Q9U8M0\_Periplaneta\_american  
ADU04393.1\_B\_tabaci\_EHJ-II  
Q27309\_Bombyx\_mori

VWFD

A7BK94\_Nilaparvata\_lugens  
Q868N5\_Apis\_mellifera  
R4KE43\_Helicoverpa\_armigera  
Q9USD8\_Plautia\_stali  
O02024\_Riptortus\_clavatus  
D6W7J2\_Tribolium\_castaneum  
D6W721\_Tribolium\_castaneum





D6W721\_Tribolium\_castaneum  
B\_tabaci\_Asial  
 BAG84131\_Tetranychus\_urticae  
 ADU04394.1\_B\_tabaci\_Q  
 Q16927\_Aedes\_aegypti  
 G0ETK0\_Nilaparvata\_lugens  
 Q9BPS0\_Periplaneta\_americanana  
 B0VE52\_Pediculus\_humanus\_corporis  
 B0W351\_Culex\_quinquefasciatus  
 O76823\_Blattella\_germanica  
 Q7PQM2\_Anopheles\_gambiae  
 UPI000258B3A9\_Megachile\_rotundata  
 ADU04392.1\_1\_B\_tabaci\_B  
 Q9U8M0\_Periplaneta\_americanana  
 ADU04393.1\_B\_tabaci\_EHJ-II  
 Q27309\_Bombyx\_mori

```

-----
QNKKYARNEDASYSSSSSSSSSSSDSSSSSSSSMDN-----
KNNKYAKDQDSSYSSSSSSSSSDSSSSSSSDSSSSSSSSSSPSSSSSSSDSS
RYRYYNHNVBESSSSSSSSSDSSSSSSSESSSR-----
GIRPYDIDDDSSSSSSSSSSSSSSSSSSSKSNS-----
RYRYYNHNVDSSSSESDSSSSSSSESSSNSKSDSSS-----
QVIKLADTSSSESSSESHENNSPSSBSQVNKSKRQPNSRPR-----
RYNYYYKDFDLSSSSSSESSSSSDE-----
KNNKYAKDQDSSYSSSSSSSDSSSSSSSDSSSSSSSS-----
FELPHPVNDTSSSSSSSESSSSSSSSSESASNSDLHNN-----
KNNKYAKDQDSSYSSSSSSSDSSSSSSSDSSSSSSSSPSSSSSSSDSS
-----

```

A7BK94\_Nilaparvata\_lugens  
 Q868N5\_Apis\_mellifera  
 R4KE43\_Helicoverpa\_armigera  
 Q9U5D8\_Plautia\_stali  
 O02024\_Riptortus\_clavatus  
 D6W7J2\_Tribolium\_castaneum  
 D6W721\_Tribolium\_castaneum  
B\_tabaci\_Asial  
 BAG84131\_Tetranychus\_urticae  
 ADU04394.1\_B\_tabaci\_Q  
 Q16927\_Aedes\_aegypti  
 G0ETK0\_Nilaparvata\_lugens  
 Q9BPS0\_Periplaneta\_americanana  
 B0VE52\_Pediculus\_humanus\_corporis  
 B0W351\_Culex\_quinquefasciatus  
 O76823\_Blattella\_germanica  
 Q7PQM2\_Anopheles\_gambiae  
 UPI000258B3A9\_Megachile\_rotundata  
 ADU04392.1\_1\_B\_tabaci\_B  
 Q9U8M0\_Periplaneta\_americanana  
 ADU04393.1\_B\_tabaci\_EHJ-II  
 Q27309\_Bombyx\_mori

```

--SSSSSSNRNNNRNNNNKNNRSNNNSSERLANP-----
-----DTEMSTWGYHHNVNKHCT-----
AIRQRDEBWTSTPNVYRTRSYLKKRGQCQ-----
-----RRLQTMPGNDIEGKLPMPSCS-----
QQQNNKSKKNKANGSEBRMKVQGSBCS-----
-----GGEMYAREG-----
IDAERRGRGBCS-----
SYYYNNNGNNDNNNRNNNRNNKNNRNGSSSSSSSSSSPSSMBSYBQR
RRSPKFLSAGKSDKKASIQP-----
SSSSSSSQSNDNNRNNNNRNNNSNNNNNRNNNNRNNNNNNSSSSQSBASYBQR
SRSGSSSSSSSEBQKQEPHFKQBEHSMKBCP-----
SSSSSSNRNNNRNNNNRNNRSNNNSSERLANP-----
TSSSSSESNESALPRGENKLHRAQPPSRNCH-----
BYGDSQEBESGETTDGHNTKCT-----
SSSSSSSSSSSEBSEKHEPDSQKYSMKBCD-----
SSSSSSSSSSSESNBSVLAKKIINNQIGKPE-----TLIPBQSPM
SDDSNSSSEBRKPNREHFFEKQOYTEKCA-----
SSSSSSSSSDSSSQSNDNNRNNNNRNNNNRQ-----
STSSSSSSSSSEBSEAGAPEKSRKTSBPQ-----
SSSSSSSQSNDNNRNNNNRNNNSNNNNNRNNNNRNNNNNNSSSSQSBASYBQR
BSQSCGEDQWQSETVYKRSYDKHKGACB-----

```

A7BK94\_Nilaparvata\_lugens  
 Q868N5\_Apis\_mellifera  
 R4KE43\_Helicoverpa\_armigera  
 Q9U5D8\_Plautia\_stali  
 O02024\_Riptortus\_clavatus  
 D6W7J2\_Tribolium\_castaneum  
 D6W721\_Tribolium\_castaneum  
B\_tabaci\_Asial  
 BAG84131\_Tetranychus\_urticae  
 ADU04394.1\_B\_tabaci\_Q  
 Q16927\_Aedes\_aegypti  
 G0ETK0\_Nilaparvata\_lugens  
 Q9BPS0\_Periplaneta\_americanana  
 B0VE52\_Pediculus\_humanus\_corporis  
 B0W351\_Culex\_quinquefasciatus  
 O76823\_Blattella\_germanica  
 Q7PQM2\_Anopheles\_gambiae  
 UPI000258B3A9\_Megachile\_rotundata  
 ADU04392.1\_1\_B\_tabaci\_B  
 Q9U8M0\_Periplaneta\_americanana  
 ADU04393.1\_B\_tabaci\_EHJ-II  
 Q27309\_Bombyx\_mori

```

-----TKLIQDVKNNGDQVCISIRPVPKQCKG-FSPAGSSEKBEVDYVCM
IHRTOVKETDDKICFTMRPVVSCASG-CTAVETKSKPKYKFCM
LVQQVQYHBNHGBICITTTPLPSCQSH-CHGEGYKVOAAQVICQ
TYKIQIVKEGGRSCFSLRPQVSCNPN-CKPTKNIQKHEIFHCR
KLMTQIVBENDKSCFSTTPQACASH-CRPTGKIQKIVDFHCV
IMYRTOYALAAGQTCFISISVPVCKDG-YKQVESLNRFPVPAHCV
KLQTRYVBNGBICFTIRPLPVCKSR-CQQRGTIYKNVQVYCS
NQNGPSIRKLYRSMNGBDGTCSFVNSIPTCRYF-YKPOGGANKEIDFYCV
ELRTIVIKRENDICLSKFPPEYMCNPN-FKPTTTTSKQIDLVC
NQNGPSIRKLYRAINQDDMCFTINAIPTCRYF-AKPVGSAKKMVDIFYCA
VQHQQVFEQGDRTCFSLRPLPVCHSK-CVATEKISKYFDVHCF
TKLIQDVKNNGDQVCISIRPVPKQCKG-FSPAGSSEKBEVDYVCM
MHLHRIVTRNGKQICISKLALTECAPL-CREESHSTTKTEAFVCF
TKRIMVIERDQKHCFSVHPQACKPG-CQVBKTKTMNAEFICV
MVHQVQYVEKDNELCFSKRPLPVCNSR-CKAVEKEAKYVDVHCR
TSDDKCMTQQRPHTYBNQFCVSEKPLDTCMPLICHATESYIDVNFYCV
MQHRVQYIEQGDKICFTNRALPTCSSQ-CKAFEKIQKYVDVHCR
-----PACATI-SR-----
CQQQQPQQQQPQQQQQQQQQQQQQQQQQQQQQQQQQQQQQQQQQQQQQQQQQQ
STLHRTMVVEBVTBICFSMRPLPECAPR-FKPADTLKKKIKFHCCL
NQNGPSIRKLYRAINQDDMCFTINAIPTCRYF-AKPVGSAKKMVDIFYCA
VRQQVQFYBNHGBICITTSRVVPSQSH-CRAGDYKIQHVQVTC

```

A7BK94\_Nilaparvata\_lugens  
 Q868N5\_Apis\_mellifera  
 R4KE43\_Helicoverpa\_armigera  
 Q9U5D8\_Plautia\_stali  
 O02024\_Riptortus\_clavatus

```

SHGKN-AQFWINQIFQGGYV-LLEQKQH--NAT--FMKNIPQRCVRDN--
EKNEA-AMKLLKRIEKGANP-DLSQKPV--STT--BELTVPFVCKA----
SKADQQRFTYRNQIQGGQNP-QVTGVPK--VEQ--YRVPTSCKA----
PDNDNLTGHWLRMVQKGANP-DLSQKSS--NSK--MSVMLPBGCTSIIH--
QASSS-SRNWAQMIKNGANP-DPSAKEK--HRQ--ILLQLPTGCVFKA--

```

|                                   |                                                      |
|-----------------------------------|------------------------------------------------------|
| D6W7J2_Tribolium_castaneum        | ESSQL-ARSLRRQIDQGANF-SFKSKPC--HSE--VMMOMAKRCEN----   |
| D6W721_Tribolium_castaneum        | RSTSS-TNLWKNEIQKGASP-DPSLQQV--SKT--IQMEMPKKCLP----   |
| <u>B_tabaci_Asiaticus</u>         | PRNSEEAQYFEKLMKKGVNPSQLSSKKA--NQ--FKVNIPEYCVV----    |
| BAG84131_Tetranychus_urticae      | PNAHPTAHLWAKEAEKRLIT-EVRDFDS--TST--STYDRPTKCVAESVR   |
| ADU04394.1_B_tabaci_Q             | PKSSSEAAQHFSKLIAGGAAPSQLSLKKF--NQK--FEVNIPEYCVV----  |
| Q16927_Aedes_aegypti              | EKDSTQAKKPKSDIGRGYTP-DFKSFAP--HKT--YKFNYPKSCVYKAY-   |
| G0ETK0_Nilaparvata_lugens         | SHGKN-AQFWINQIFQGGYV-KLEQKQH--NAT--FMKNIPQRCVDRN--   |
| Q9BPS0_Periplaneta_americana      | PPGPT-ADHYTKLVRKGVSP-DFSRKTD--IVN--LRVTIPSRCVFSKI--  |
| B0VE52_Pediculus_humanus_corporis | NKTQT-SSHWAQMVARGAQP-NPKNKAN--ACK--MQFEGPEVCTDA---   |
| B0W351_Culex_quinquefasciatus     | SVQDSAAQMLKQQIRKGVNP-DMSAKSV--SKT--MKFAVPKQCVHIH--   |
| O76823_Blattella_germanica        | PLGPA-AHHYMKLVKKGILP-DLSRNRN--GRVVLPVFIPIQCEPVLN-    |
| Q7PQM2_Anopheles_gambiae          | DATDSAAQLFKQIRKGVNP-DMSNKSIV--TST--VKYFEPKCKVFAN--   |
| UPI000258B3A9_Megachile_rotundata | -----R-----                                          |
| ADU04392.1_1_B_tabaci_B           | PRSQLRTKPKKRTLYPQTVPCHQPRRREVLHQRYPNLQIPSCARWKRQHE   |
| Q9U8M0_Periplaneta_americana      | TKGPT-ASHWLKMKVKKGVNP-DFSARKRE--HQ--LEVDIPAKCVRRH--- |
| ADU04393.1_B_tabaci_SHJ-II        | PKSSSEAAQHFSKLIAGGAAPSQLSLKKF--NQK--FEVNIPEYCVV----  |
| Q27309_Bombyx_mori                | SKLDHDFRMYKBEQIKKQNE-EVSGIPS--VQK--FKVPEVTCQF----    |

|                                   |     |
|-----------------------------------|-----|
| A7BK94_Nilaparvata_lugens         | --  |
| Q868N5_Apis_mellifera             | --  |
| R4KE43_Helicoverpa_armigera       | --  |
| Q9USD8_Plautia_stali              | --  |
| O02024_Riptortus_clavatus         | --  |
| D6W7J2_Tribolium_castaneum        | --  |
| D6W721_Tribolium_castaneum        | --  |
| <u>B_tabaci_Asiaticus</u>         | --  |
| BAG84131_Tetranychus_urticae      | G I |
| ADU04394.1_B_tabaci_Q             | --  |
| Q16927_Aedes_aegypti              | --  |
| G0ETK0_Nilaparvata_lugens         | --  |
| Q9BPS0_Periplaneta_americana      | --  |
| B0VE52_Pediculus_humanus_corporis | --  |
| B0W351_Culex_quinquefasciatus     | --  |
| O76823_Blattella_germanica        | --  |
| Q7PQM2_Anopheles_gambiae          | --  |
| UPI000258B3A9_Megachile_rotundata | --  |
| ADU04392.1_1_B_tabaci_B           | N G |
| Q9U8M0_Periplaneta_americana      | --  |
| ADU04393.1_B_tabaci_SHJ-II        | --  |
| Q27309_Bombyx_mori                | --  |
