# Supplementary material for: Molecular Characterization of Vitellogenin and Vitellogenin Receptor of Bemisia tabaci
Source: PubMed Central journal article supplement (PMC4861306; doi:10.1371/journal.pone.0155306), 2016-05-09
Supplement: pone.0155306.s012.pdf [file pone.0155306.s012.pdf]

**Supplementary file 8.** Multiple sequence alignment of full length vitellogenin receptor protein sequences of selected insects from each order. Important domains are labeled and highlighted.

1 2 3 4 5 6 7 8 9  
Variable Average Conserved

```

Bemisia tabaci Asia_1
T1E9W2 Anopheles aquasalis
P98163 Drosophila melanogaster
B4Q2Q9 Drosophila yakuba
B4IGA9 Drosophila sechellia
K4MUW4 Actias selene
Q1T728 Rhyarobia maderae
O76952 Aedes aegypti
Q6X0I2 Solenopsis invicta
ADE34166.1 Nilaparvata lugens
D5KXW4 Nilaparvata lugens
BAC02725 Periplaneta americana
ADM34986.1_1_B tabaci_B
CAJ19121 Blattella germanica
H2CLV8 Antheraea pernyi
XP_008180459 Acyrthosiphon pisum
UPI000252AABD Apis florea
UPI0001758603 Tribolium castaneum
T1KD20 Tetranychus urticae
UPI0002063B8E Apis mellifera
E2FLQ4 Bombyx mori

```

```

Bemisia tabaci Asia_1
T1E9W2 Anopheles aquasalis
P98163 Drosophila melanogaster
B4Q2Q9 Drosophila yakuba
B4IGA9 Drosophila sechellia
K4MUW4 Actias selene
Q1T728 Rhyarobia maderae
O76952 Aedes aegypti
Q6X0I2 Solenopsis invicta
ADE34166.1 Nilaparvata lugens
D5KXW4 Nilaparvata lugens
BAC02725 Periplaneta americana
ADM34986.1_1_B tabaci_B
CAJ19121 Blattella germanica
H2CLV8 Antheraea pernyi
XP_008180459 Acyrthosiphon pisum
UPI000252AABD Apis florea
UPI0001758603 Tribolium castaneum
T1KD20 Tetranychus urticae
UPI0002063B8E Apis mellifera
E2FLQ4 Bombyx mori

```

```

Bemisia tabaci Asia_1
T1E9W2 Anopheles aquasalis
P98163 Drosophila melanogaster
B4Q2Q9 Drosophila yakuba
B4IGA9 Drosophila sechellia
K4MUW4 Actias selene
Q1T728 Rhyarobia maderae
O76952 Aedes aegypti
Q6X0I2 Solenopsis invicta
ADE34166.1 Nilaparvata lugens
D5KXW4 Nilaparvata lugens
BAC02725 Periplaneta americana
ADM34986.1_1_B tabaci_B
CAJ19121 Blattella germanica
H2CLV8 Antheraea pernyi
XP_008180459 Acyrthosiphon pisum
UPI000252AABD Apis florea
UPI0001758603 Tribolium castaneum
T1KD20 Tetranychus urticae
UPI0002063B8E Apis mellifera
E2FLQ4 Bombyx mori

```

## LDLa

Bemisia tabaci Asia 1  
 T1E9W2\_Anopheles\_aquasalis  
 P98163\_Drosophila\_melanogaster  
 B4Q2Q9\_Drosophila\_yakuba  
 B4IGA9\_Drosophila\_sechellia  
 K4MUW4\_Actias\_selene  
 Q1T728\_Rhyparobia\_maderae  
 O76952\_Aedes\_aegypti  
 Q6X0I2\_Solenopsis\_invicta  
 ADE34166.1\_Nilaparvata\_lugens  
 D5KXW4\_Nilaparvata\_lugens  
 BAC02725\_Periplaneta\_americana  
 ADM34986.1\_1\_B\_tabaci\_B  
 CAJ19121\_Blattella\_germanica  
 H2CLV8\_Antheraea\_pernyi  
 XP\_008180459\_Acyrtosiphon\_pisum  
 UPI000252AABD\_Apis\_florea  
 UPI0001758603\_Tribolium\_castaneum  
 T1KD20\_Tetranychus\_urticae  
 UPI0002063B8E\_Apis\_mellifera  
 E2FLQ4\_Bombyx\_mori

```

FECTNHR--CISMDLRCDGDDDCNDGSDHGCNVD-----KSKNETC
-----LDLMCDGIDHCRDGSDE-----
FPCAQPHGACLAALMLCNGIDNCPGGEDELNCPVRPGFRFGDTAHRMRSC
FPCAQPHGACLAALMLCNGIDNCPGGEDELNCPVRPGFRFGDTAHRMRSC
FPCAQPHGACLAALMLCNGIDNCPGGEDELNCPVRPGFRFGDTAHRMRSC
FPCMSGG--CIQSSQYCDGKVDGDDGTDENYCLDH-----KPDAPFCN
FRCRTGR--CISSSLRCDTDDDCGDWSDEEDCFPT-----VSEPARC
YRCKHDK-S-CISATFLCDKHDDCPLGDDEBNCENF-----EVPHVPC
FQCNSGE--CIPVDKCKDYIDHCIDGSDHDFECDH-----LDEKSFITC
FECGNNGN--CIDGDMVCNDVVRDCLDGSDEDEQLCH-TQHQEHHINYPEC
FECGNNGN--CIDGDMVCNDVVRDCLDGSDEDEQLCH-TQHQEHHINYPEC
FRCHNGR--CTSKSFHCDGVDDCGGWSDEEDCYEM-----ESKPANC
FECTNHR--CISMDLRCDGDDDCNDGSDHGCNVD-----KSKNETC
FRCRNGR--CISSGMRCDGDDDCGDWSDEDDCHIE-----HVPKNC
FPCMSGG--CIQSSQYCDGKVDGDDGTDENYCLDH-----KPDAPFCN
FECDNKR-KCIPKKEFVCDKSNEDIDKSDSHCKET-----SSSLTQSC
FHCKNGK--CISSLFRCDGENECGDNSDEMDCNGE-----TNLHMIRC
-----
FPCMSGG--CIQSSQYCDGKVDGDDGTDENYCLDH-----KPDAPFCN
  
```

## LDLa

Bemisia tabaci Asia 1  
 T1E9W2\_Anopheles\_aquasalis  
 P98163\_Drosophila\_melanogaster  
 B4Q2Q9\_Drosophila\_yakuba  
 B4IGA9\_Drosophila\_sechellia  
 K4MUW4\_Actias\_selene  
 Q1T728\_Rhyparobia\_maderae  
 O76952\_Aedes\_aegypti  
 Q6X0I2\_Solenopsis\_invicta  
 ADE34166.1\_Nilaparvata\_lugens  
 D5KXW4\_Nilaparvata\_lugens  
 BAC02725\_Periplaneta\_americana  
 ADM34986.1\_1\_B\_tabaci\_B  
 CAJ19121\_Blattella\_germanica  
 H2CLV8\_Antheraea\_pernyi  
 XP\_008180459\_Acyrtosiphon\_pisum  
 UPI000252AABD\_Apis\_florea  
 UPI0001758603\_Tribolium\_castaneum  
 T1KD20\_Tetranychus\_urticae  
 UPI0002063B8E\_Apis\_mellifera  
 E2FLQ4\_Bombyx\_mori

```

ASTQFDCG-QGQCIPRSWVCDGNADCEDGKDEGAAGCAESHCAA--SEWE
-----TIGCIDIDSKC--SGFL
SKYEFTCQQDRTCIPIDFMCDGRPDCTDKSDE-VAGCKQAEITCPGEGHL
SKYEFTCQQDRTCIPIDFMCDGRVDCDTSDE-VAGCKQAEATCSVEGHL
SKYEFTCQQDRTCIPIDFMCDGRPDCTDKSDE-VAGCKQAEVTCPEGHL
ETHQFMCRDSSKKCIPNHWCNNDIDCDDGSDE-LNCTLVPVATGKCKGFL
KKDEWHCINDNNCIPTDWWVCDGKQDCMDGTDE-LQGCSSVDCS--DGFV
SKFEFTCT-DKMCIPDLVCDGVSHCLDGSDE-TIGCKDIENKC--KGFV
AKDQFKCK-NQECIPAAKYCDMVNDCLDESDE-HDGCVKHLNCT--NKFL
NATQFTCD-DKMCIPWAVVCDGEPNCLDDSDEKTSLQKHHCSR--EEFQ
NATQFTCD-DKMCIPWAVVCDGEPNCLDDSDEKTSLQKHHCSR--EEFQ
TADEWRV-DNNCIFMWWVCDGKQDCMDGSDE-LQGCSSHMSCE--DGFV
ASTQFDCG-QGQCIPRSWVCDGNADCEDGKDEGAAGCAESHCAA--SEWE
TDESEWRM-DNNCIIIDWVCDGRQDCMDGSDE-LQGCSTVLSCH--DGFV
ETHQFMCRDSSKKCIPNHWCNNDIDCDDGSDE-LNCTLVPVATGKCKGFL
REGKFKCS-DGTCIPMAWHCDAEIDCHDGSDEDEGEKCRYTTLCT--SGYM
TTDEFQCA-DHSCIPPEKFCDAKSDCYDGSDE-YIGCVKELKCN--NSFR
-----
-----VESVQPSIQVNSSEVTSTNFSDYNETISTTPLSST--TFI
-----EKT-NAVTIPTKWIAMA--SNDE-YVGCVKELKCN--NNFR
ETHQFMCRDSSKKCIPNHWCNNDIDCDDGSDE-LNCTLVPVATGKCKGFL
  
```

## LDLa

Bemisia tabaci Asia 1  
 T1E9W2\_Anopheles\_aquasalis  
 P98163\_Drosophila\_melanogaster  
 B4Q2Q9\_Drosophila\_yakuba  
 B4IGA9\_Drosophila\_sechellia  
 K4MUW4\_Actias\_selene  
 Q1T728\_Rhyparobia\_maderae  
 O76952\_Aedes\_aegypti  
 Q6X0I2\_Solenopsis\_invicta  
 ADE34166.1\_Nilaparvata\_lugens  
 D5KXW4\_Nilaparvata\_lugens  
 BAC02725\_Periplaneta\_americana  
 ADM34986.1\_1\_B\_tabaci\_B  
 CAJ19121\_Blattella\_germanica  
 H2CLV8\_Antheraea\_pernyi  
 XP\_008180459\_Acyrtosiphon\_pisum  
 UPI000252AABD\_Apis\_florea  
 UPI0001758603\_Tribolium\_castaneum  
 T1KD20\_Tetranychus\_urticae  
 UPI0002063B8E\_Apis\_mellifera  
 E2FLQ4\_Bombyx\_mori

```

CPHNHRCIP-NDYICDGDGDDCGDNSDENDCTGKNNF--TECTSA-----
C-RNKHCLRTSSWVCDGMRDCSDGSDHEHC-----VHECTLE-----
C-ANGRCLRRKQWVCDGVDDCGDGSDEKGC-----LNLCEPQ-----
C-ANGRCLRRKQWVCDGVDDCGDGSDEKGC-----LNLCEPQ-----
C-ANGRCLRRKQWVCDGVDDCGDGSDEKGC-----LNLCEPQ-----
C-ANGRCLRRKQWVCDGVDDCGDGSDEKGC-----LNLCEPQ-----
C-ODGKCIS-SLWLCDGSDYDCKDKSDENSPEBNCRRSLLSHSMLSGSDCQD
C-NNHHCIP-VTFHCDGSDDCDGDSDERNCSLILHILPEDCTHE-----
C-KNKRKINSHDWVCDGIDDCDGDGSDEENC-----FIGDLE-----
C-TDGHICIN-KEWVCDGRNDCPDGNDEWNCANKTSSASSCKTE-----
C-RDGHICIE-EDFKCDGSDPKDKDGSDEENCVGVVYSMDDECTLD-----
C-RDGHICIE-EDFKCDGSDPKDKDGSDEENCVGVVYSMDDECTLD-----
C-GNYHCIP-NSFLCDGDDCGDNSDEKLCPSVRNVPPEDCKLE-----
CPHNHRCIP-NDYICDGDGDDCGDNSDENDCTGKNNF--TECTSA-----
C-KNGHCLP-ITFHCDGSDDCDGDNSDEYCPVHYIPEPNTTD-----
C-ODGKCIS-SLWLCDGSDYDCKDKSDENSPEBNCRRSLLSHSMLSGSDCQD
C-KNFNCVS-KTWRCDGKDDCGDGSDETHC-DIQLVEPEKCLIE-----
C-KDSHCIR-KEWVCDGVDPDPDKSDEEKCS-NILSIEECNNE-----
-----
N-----QANTEDDGDLKTSN-----
C-KDSHCIR-NEWVCDGVDPDPDKSDEEKCS-NIVSIEKCNNE-----
C-ODGKCIS-SLWLCDGSDYDCKDKSDENSPEBNCRRSLLSHSMLSGSDCQE
  
```

## LDLa

|                                          |            |        |       |          |       |       |       |       |       |       |       |
|------------------------------------------|------------|--------|-------|----------|-------|-------|-------|-------|-------|-------|-------|
| <u>Bemisia tabaci Asia 1</u>             | ----FGKFLC | KNRNQ  | CIDDT | FLCNGHF  | DKD   | GSDEG | -GH   | CASK  | AQVA  | AD    | C     |
| T1E9W2 <i>Anopheles aquasalis</i>        | ----HGKFEC | ANNDT  | CIAT  | IVCNGKAD | CD    | DSDEG | -AG   | CK    | ---   | ND    | S     |
| P98163 <i>Drosophila melanogaster</i>    | ----KGFKFL | RNRRET | CLT   | SVVCDGHS | DCS   | DSDET | -DL   | CHS   | ---   | K     | P     |
| B4Q2Q9 <i>Drosophila yakuba</i>          | ----HGKFEC | ADNRET | CLV   | SVVCDGHS | DCS   | DSDET | -FL   | CHS   | ---   | K     | P     |
| B4IGA9 <i>Drosophila sechellia</i>       | ----KGFKFL | RNRRET | CLT   | SVVCDGHS | DCS   | DSDET | -DL   | CHS   | ---   | K     | P     |
| K4MUW4 <i>Actias selene</i>              | WLGRRQYK   | TDSS   | FCLP  | SEM      | MCD   | GMD   | CKD   | GS    | DER   | -S    | F     |
| Q1T728 <i>Rhyarobia maderae</i>          | ----RNFHLC | RDNR   | CI    | SLD      | FLC   | DGVR  | NC    | PD    | YS    | DEG   | -I    |
| O76952 <i>Aedes aegypti</i>              | ----HGKFEC | ADNRET | CLV   | SVVCDGHS | DCS   | DSDET | -FL   | CHS   | ---   | K     | P     |
| Q6X0I2 <i>Solenopsis invicta</i>         | ----NYQYMC | ANHR   | -CI   | SLK      | VV    | CD    | KKD   | CGD   | GS    | DEG   | -PG   |
| ADE34166.1 <i>Nilaparvata lugens</i>     | ----NERFPC | HDR    | TL    | CID      | IS    | AL    | CNN   | KR    | DC    | FD    | GS    |
| D5KXW4 <i>Nilaparvata lugens</i>         | ----NERFPC | HDR    | TL    | CID      | IS    | AL    | CNN   | KR    | DC    | FD    | GS    |
| BAC02725 <i>Periplaneta americana</i>    | ----KNLFLC | ADRQE  | CV    | VR       | RL    | CD    | GT    | FC    | YD    | GS    | DEG   |
| ADM34986.1_1_B tabaci_B                  | ----FGKFLC | KNRNQ  | CIDDS | FLCNGHF  | DKD   | GSDEG | -GH   | CASK  | AQVA  | AD    | C     |
| CAJ19121 <i>Blattella germanica</i>      | ----KNLHLC | HDR    | TL    | CID      | IS    | AL    | CNN   | KR    | DC    | FD    | GS    |
| H2CLV8 <i>Antheraea pernyi</i>           | WLGRRQYK   | TDSS   | FCLP  | SEM      | MCD   | GMD   | CKD   | GS    | DER   | -S    | F     |
| XP_008180459 <i>Acyrtosiphon pisum</i>   | ----NRKFLC | ADH    | KK    | CID      | VR    | SV    | VCD   | YNN   | DL    | AD    | S     |
| UPI000252AABD <i>Apis florea</i>         | ----YDRYLC | KNQR   | -CI   | PL       | NAT   | C     | DE    | EKN   | CGD   | NS    | DE    |
| UPI0001758603 <i>Tribolium castaneum</i> | -----      | -----  | ----- | -----    | ----- | ----- | ----- | ----- | ----- | ----- | ----- |
| T1KD20 <i>Tetranychus urticae</i>        | -----      | -----  | ----- | -----    | ----- | ----- | ----- | ----- | ----- | ----- | ----- |
| UPI0002063B8E <i>Apis mellifera</i>      | ----HDRYLC | KNQR   | -CI   | PL       | NAT   | C     | NE    | EKN   | CGD   | NS    | DE    |
| E2FLQ4 <i>Bombyx mori</i>                | WLGRRQYK   | TDSS   | FCLP  | SEM      | MCD   | GMD   | CKD   | GS    | DER   | -P    | F     |

## EGF

|                                          |       |       |       |       |       |       |       |       |       |       |       |       |       |       |
|------------------------------------------|-------|-------|-------|-------|-------|-------|-------|-------|-------|-------|-------|-------|-------|-------|
| <u>Bemisia tabaci Asia 1</u>             | A-KL  | NC    | -THS  | --CV  | SPDG  | -PV   | CV    | CGS   | GYHL  | --EG  | --NV  | CE    | DINEC | -LE   |
| T1E9W2 <i>Anopheles aquasalis</i>        | A-EL  | K     | CGDRP | --CK  | RM    | NG    | RS    | V     | CL    | CE    | T     | G     | FR    | NN    |
| P98163 <i>Drosophila melanogaster</i>    | D-AK  | K     | -AL   | GAK   | CH    | M     | P     | A     | S     | G     | A     | E     | C     | F     |
| B4Q2Q9 <i>Drosophila yakuba</i>          | E-TK  | K     | -PL   | GAK   | CH    | M     | S     | T     | S     | G     | A     | E     | C     | F     |
| B4IGA9 <i>Drosophila sechellia</i>       | D-AK  | K     | -AL   | GAK   | CH    | M     | P     | A     | S     | G     | A     | E     | C     | F     |
| K4MUW4 <i>Actias selene</i>              | A-NHT | CL    | GD    | K     | A     | S     | CV    | P     | D     | R     | A     | G     | -P    | T     |
| Q1T728 <i>Rhyarobia maderae</i>          | K-AIK | C     | -DHL  | --CV  | P     | T     | P     | R     | G     | -A    | I     | C     | V     | C     |
| O76952 <i>Aedes aegypti</i>              | D-SMR | C     | -PEG  | --CK  | A     | T     | P     | H     | G     | -A    | V     | C     | L     | K     |
| Q6X0I2 <i>Solenopsis invicta</i>         | S-SAG | C     | Q     | S     | N     | --CH  | Q     | T     | P     | K     | G     | -S    | V     | T     |
| ADE34166.1 <i>Nilaparvata lugens</i>     | NGKAN | C     | S     | I     | E     | Q--CF | Q     | S     | P     | S     | G     | -Q    | I     | C     |
| D5KXW4 <i>Nilaparvata lugens</i>         | NGKAN | C     | S     | I     | E     | Q--CF | Q     | S     | P     | S     | G     | -Q    | I     | C     |
| BAC02725 <i>Periplaneta americana</i>    | P-TV  | G     | -SH   | Q--CI | P     | S     | P     | Q     | G     | -P    | L     | C     | V     | C     |
| ADM34986.1_1_B tabaci_B                  | A-KL  | NC    | -THS  | --CV  | SPDG  | -PV   | CV    | CGS   | GYHL  | --EG  | --NV  | CE    | DINEC | -LE   |
| CAJ19121 <i>Blattella germanica</i>      | R-TAW | C     | -NHR  | --CI  | P     | T     | P     | Q     | G     | -P    | Q     | C     | V     | C     |
| H2CLV8 <i>Antheraea pernyi</i>           | A-NHT | CL    | GD    | K     | A     | S     | CV    | P     | D     | R     | A     | G     | -P    | T     |
| XP_008180459 <i>Acyrtosiphon pisum</i>   | N-SM  | N     | -SAA  | F     | E     | C     | L     | R     | K     | P     | H     | G     | -I    | M     |
| UPI000252AABD <i>Apis florea</i>         | KLTAK | C     | -QHN  | --CR  | K     | T     | P     | K     | G     | -Q    | C     | S     | R     | S     |
| UPI0001758603 <i>Tribolium castaneum</i> | ----- | ----- | ----- | ----- | ----- | ----- | ----- | ----- | ----- | ----- | ----- | ----- | ----- | ----- |
| T1KD20 <i>Tetranychus urticae</i>        | --I   | V     | I     | A     | S     | P     | K     | P     | A     | T     | V     | L     | P     | N     |
| UPI0002063B8E <i>Apis mellifera</i>      | KLTAK | C     | -EHN  | --CR  | K     | T     | P     | K     | G     | -A    | Q     | C     | S     | R     |
| E2FLQ4 <i>Bombyx mori</i>                | A-NHT | CL    | GD    | K     | A     | S     | CV    | P     | D     | R     | A     | G     | -P    | T     |

## Calcium binding EGF

|                                          |       |       |       |       |       |       |       |       |       |       |       |       |       |       |
|------------------------------------------|-------|-------|-------|-------|-------|-------|-------|-------|-------|-------|-------|-------|-------|-------|
| <u>Bemisia tabaci Asia 1</u>             | WG    | T     | C     | D     | M     | C     | E     | N     | T     | -V    | G     | G     | Y     | I     |
| T1E9W2 <i>Anopheles aquasalis</i>        | YGL   | C     | S     | Q     | G     | C     | I     | N     | T     | -P    | G     | S     | F     | R     |
| P98163 <i>Drosophila melanogaster</i>    | DDL   | C     | S     | Q     | G     | C     | E     | N     | T     | -S    | G     | G     | Y     | R     |
| B4Q2Q9 <i>Drosophila yakuba</i>          | DDL   | C     | S     | Q     | G     | C     | E     | N     | T     | -S    | G     | G     | Y     | R     |
| B4IGA9 <i>Drosophila sechellia</i>       | DDL   | C     | S     | Q     | G     | C     | E     | N     | T     | -S    | G     | G     | Y     | R     |
| K4MUW4 <i>Actias selene</i>              | RP    | Q     | C     | S     | H     | Y     | C     | V     | N     | A     | -D    | G     | H     | F     |
| Q1T728 <i>Rhyarobia maderae</i>          | YGI   | C     | D     | Q     | K     | C     | K     | N     | L     | -P    | G     | S     | Y     | S     |
| O76952 <i>Aedes aegypti</i>              | YGL   | C     | S     | Q     | G     | C     | E     | N     | T     | -P    | G     | S     | F     | R     |
| Q6X0I2 <i>Solenopsis invicta</i>         | YGI   | C     | D     | Q     | C     | M     | N     | V     | -P    | G     | S     | Y     | A     | C     |
| ADE34166.1 <i>Nilaparvata lugens</i>     | FGI   | C     | D     | Q     | K     | C     | S     | N     | L     | -V    | G     | G     | F     | R     |
| D5KXW4 <i>Nilaparvata lugens</i>         | FGI   | C     | D     | Q     | K     | C     | S     | N     | L     | -V    | G     | G     | F     | R     |
| BAC02725 <i>Periplaneta americana</i>    | YGI   | C     | D     | Q     | R     | C     | R     | N     | L     | -Q    | G     | S     | Y     | S     |
| ADM34986.1_1_B tabaci_B                  | WG    | T     | C     | D     | M     | C     | E     | N     | T     | -V    | G     | G     | Y     | I     |
| CAJ19121 <i>Blattella germanica</i>      | YGI   | C     | D     | Q     | K     | C     | L     | N     | M     | -P    | G     | K     | Y     | C     |
| H2CLV8 <i>Antheraea pernyi</i>           | RP    | Q     | C     | S     | H     | Y     | C     | V     | N     | A     | -D    | G     | H     | F     |
| XP_008180459 <i>Acyrtosiphon pisum</i>   | YGI   | C     | D     | Q     | V     | C     | L     | N     | L     | -E    | G     | S     | Y     | T     |
| UPI000252AABD <i>Apis florea</i>         | YGI   | C     | D     | Q     | Q     | C     | I     | N     | S     | -A    | G     | S     | Y     | T     |
| UPI0001758603 <i>Tribolium castaneum</i> | ----- | ----- | ----- | ----- | ----- | ----- | ----- | ----- | ----- | ----- | ----- | ----- | ----- | ----- |
| T1KD20 <i>Tetranychus urticae</i>        | NG    | N     | C     | S     | D     | I     | C     | L     | D     | L     | G     | N     | G     | T     |
| UPI0002063B8E <i>Apis mellifera</i>      | YGI   | C     | D     | Q     | Q     | C     | I     | N     | N     | -A    | G     | S     | Y     | S     |
| E2FLQ4 <i>Bombyx mori</i>                | RP    | Q     | C     | S     | H     | Y     | C     | V     | N     | A     | -D    | G     | H     | F     |

|                                   |    |    |   |   |   |   |   |   |   |   |     |   |   |   |
|-----------------------------------|----|----|---|---|---|---|---|---|---|---|-----|---|---|---|
| <u>Bemisia tabaci Asia 1</u>      | SL | KK | I | K | S | L | Y | L | T | S | --- | R | I | S |
| T1E9W2 <i>Anopheles aquasalis</i> | TQ | R  | S | I | G | A | L | Y | L | S | --- | L | H | Q |

|                                   |                                     |                  |                    |
|-----------------------------------|-------------------------------------|------------------|--------------------|
| P98163_Drosophila_melanogaster    | TQMTIMGMHLREDNVRNHYVQVAGNLSK----    | VIGVAYDGS        | SHIYWTNIQ          |
| B4Q2Q9_Drosophila_yakuba          | TQMTIMGMHLREDNVRNHYVQVAGNLSK----    | VIGVAYDGS        | SHIYWTNIQ          |
| B4IGA9_Drosophila_sechellia       | TQMTIMGMHLREDNVRNHYVQVAGNLSK----    | VIGVAYDGS        | SHIYWTNIQ          |
| K4MUW4_Actias_selene              | TRNEIKYLKVKK-----                   | KVVVTLATGIKK---- | AHGVTNNGIYVYVWETA  |
| Q1T728_Rhyarobia_maderae          | STNQIRGFYLEK----                    | NYYFVIADNLER---- | AVGLSYDGNHVVWTELE  |
| O76952_Aedes_aegypti              | TQKSIIGGLHLNT----                   | KHQYVAKDLSQ----  | VIGVSYDGRHVVWTDIS  |
| Q6X0I2_Solenopsis_invicta         | TRTSILGMHVDS----                    | EKFPSLATNLNH---- | AVGVAMYGDYVYWSNLB  |
| ADE34166.1_Nilaparvata_lugens     | LGREIRVRFLKKS----                   | GMYHAVARNLSQ---- | AIGVEVQGHVVYWTNIY  |
| D5KXW4_Nilaparvata_lugens         | LGREIRVRFLKKS----                   | GMYHAVARNLSQ---- | AIGVEVQGHVVYWTNIY  |
| BAC02725_Periplaneta_americana    | STKEIRGLYVHK----                    | DPYVVAQSLER----  | AVGISYDGNHVVWTELM  |
| ADM34986.1_1_B_tabaci_B           | SLKKIKSLYLS-----                    | RISMTVASEVPY---- | ATGVSFDDGKHVVYWTTL |
| CAJ19121_Blattella_germanica      | STDEIRGFYIKK----                    | DPYFVIASKLER---- | AVGISYDGRHVVWTDLM  |
| H2CLV8_Antheraea_pernyi           | TRNEIKYLKVKK-----                   | KVVVTLATGIKK---- | AHGVTNNGIYVYVWETA  |
| XP_008180459_Acyrthosiphon_pisum  | SLRQIKVFNLEL----                    | LHSFTLIDDLQH---- | VTGLAVDKLTLYWTLYL  |
| UPI000252AABD_Apis_florea         | IKSEIHGYLDS-----                    | QIYFPISQNLQH---- | AVAVSLDANYVYWSDI   |
| UPI0001758603_Tribolium_castaneum | -----                               | -----            | -----              |
| T1KD20_Tetranychus_urticae        | RALQLEFPYPIDDSVNRAPPPYPPITDANYMKNVI | AVTFDYENKRLIYSDI | ---                |
| UPI0002063B8E_Apis_mellifera      | IKSEIHGYLDS-----                    | QIYFPISQNLQH---- | AVAVSLDANYIYWSDE   |
| E2FLQ4_Bombyx_mori                | TRNEIKYLKVKK-----                   | KVVVTLATGIKK---- | AHGVTNNGLYVYVWETA  |

## LDLb

|                                   |                                                      |       |       |
|-----------------------------------|------------------------------------------------------|-------|-------|
| <u>Bemisia_tabaci_Asia_1</u>      | D-GVESIVR--ASEDGSHEETTIVDSGVGSPEDLAVDWVVTGNIYFTDGEYQ |       |       |
| T1E9W2_Anopheles_aquasalis        | H-KTESIER--AQEDGSKHELLELLTAGLISPEDIALDWLTGNIYFSDSGQM |       |       |
| P98163_Drosophila_melanogaster    | N-EAESIVK--ANGDGSNAEILLTSGLDAPEDLAVDWLTGNIYFSDNIMR   |       |       |
| B4Q2Q9_Drosophila_yakuba          | N-EAESIVK--ANGDGSNAEILLTSGLDAPEDLAVDWLTGNIYFSDNIMR   |       |       |
| B4IGA9_Drosophila_sechellia       | N-EAESIVK--ANGDGSNAEILLTSGLDAPEDLAVDWLTGNIYFSDNIMR   |       |       |
| K4MUW4_Actias_selene              | E-GHQAIIVKAHIDDVNTRQVIVGLGLEDPGDI AIDFMARHIYFGDAERG  |       |       |
| Q1T728_Rhyarobia_maderae          | H-GEEAIVR--IDEDGSMETLVTAGIYQPEDLEVDWITGNIYFTDLEKK    |       |       |
| O76952_Aedes_aegypti              | F-KTESIER--SLEDGSKHELLELLTSGLDAPEDLEVDWITGNIYFSDSGHM |       |       |
| Q6X0I2_Solenopsis_invicta         | ENGYNTIVKKRTYHPQAPNEVIVTGLALITGIDVDWITKNIYFADEDNH    |       |       |
| ADE34166.1_Nilaparvata_lugens     | E-GDEMIVR--AQQLGAEEMPIVTAGLREPEDLAVDWVVTGNIYFTDSGMK  |       |       |
| D5KXW4_Nilaparvata_lugens         | E-GDEMIVR--AQQLGAEEMPIVTAGLREPEDLAVDWVVTGNIYFTDSGMK  |       |       |
| BAC02725_Periplaneta_americana    | L-GEEAIVR--SLEDGSKHEAIVTAGVYQPEDLAVDWITGNIYFTDMEAQ   |       |       |
| ADM34986.1_1_B_tabaci_B           | D-GVESIVR--ASEDGSHEETTIVDSGVGSPEDLAVDWVVTGNIYFTDGEYQ |       |       |
| CAJ19121_Blattella_germanica      | F-GEEAIVR--SLEDGSHVETLVTAGLYEPEDLMVDWVTENIYFTDAEAK   |       |       |
| H2CLV8_Antheraea_pernyi           | E-GHQAIIVKAHIDDVNTRQVIVGLGLEDPGDI AIDFMARHIYFGDAERG  |       |       |
| XP_008180459_Acyrthosiphon_pisum  | D-GNSAIVR--ANKSEKPEIIVDSGLGSPENLVIDIITHNLYFTDAKMK    |       |       |
| UPI000252AABD_Apis_florea         | N-GNEAIVK--SLEDGSKREIIVTGLSSPDNIAVDWVTDNIYFTDSGYM    |       |       |
| UPI0001758603_Tribolium_castaneum | -----                                                | ----- | ----- |
| T1KD20_Tetranychus_urticae        | --KSATINS--VFNGTDFRVIATNQ--SNVEGLSLDRQTSDLWWTSSNDS   |       |       |
| UPI0002063B8E_Apis_mellifera      | N-GNEAIVK--SLEDGSKREIIVTGLSSPDNIAVDWVTDNIYFTDSGYM    |       |       |
| E2FLQ4_Bombyx_mori                | E-GHQAIIVKAHIDDVNTRQVIVGLGLEDPGDI AIDFMARHIYFGDAERG  |       |       |

## LDLb

|                                   |                                                        |       |       |             |
|-----------------------------------|--------------------------------------------------------|-------|-------|-------------|
| <u>Bemisia_tabaci_Asia_1</u>      | QIGICTYNEELVETKCAVLHNKDLNKPRAIIVLNPADAVMYWSDWGFK-PL    |       |       |             |
| T1E9W2_Anopheles_aquasalis        | HIAVCSNDGFY----CKAIVQEQLHKPRGIALLPQNGSLFYSDWGDN-AQ     |       |       |             |
| P98163_Drosophila_melanogaster    | HIAVCSNDGGLN----CAVLVTQDVHQPRSLAVWPQKGLMFWTDWGEK-PM    |       |       |             |
| B4Q2Q9_Drosophila_yakuba          | HIAVCSNDGGLN----CAVLVTQDVHQPRSLAVWPQKGLMFWTDWGEK-PM    |       |       |             |
| B4IGA9_Drosophila_sechellia       | HIAVCSNDGGLN----CAVLVTQDVHQPRSLAVWPQKGLMFWTDWGEK-PM    |       |       |             |
| K4MUW4_Actias_selene              | LIFVCYDSGFK----CFTL-KADTKHPKFITLDPVHGKMYWADWHSR-PV     |       |       |             |
| Q1T728_Rhyarobia_maderae          | HIGVCNNGSL----CTVI V NEDIEKPRAIALLPNEGLMFWTDWG-K-SI    |       |       |             |
| O76952_Aedes_aegypti              | MIAVCSNNGVH----CTILIQD TLHKPRGIALMPQNGTLFYSDWGDN-AM    |       |       |             |
| Q6X0I2_Solenopsis_invicta         | CIGVCTNDGTY----CTVLI-KD TDKPTGVALLEPTQ GKMYWSDWGT F-PH |       |       |             |
| ADE34166.1_Nilaparvata_lugens     | MIGVCCADASH----CAVLHNRDINNPRGIALLPYEGMYWSDWGNR-SV      |       |       |             |
| D5KXW4_Nilaparvata_lugens         | MIGVCCADASH----CAVLHNRDINNPRGIALLPYEGMYWSDWGNR-SV      |       |       |             |
| BAC02725_Periplaneta_americana    | HIGVCVNGSS----CAVLVNEDIDKPRAIALLPLEGLMFWSDWGER-PL      |       |       |             |
| ADM34986.1_1_B_tabaci_B           | QIGICTYNEELVETKCAVLHNKDLNKPRAIIVLNPADAVMYWSDWGFK-PL    |       |       |             |
| CAJ19121_Blattella_germanica      | HIGVCNNGSM----CTVLVNEDIDKPRAIALLPTEGLMFWSDWGK--I       |       |       |             |
| H2CLV8_Antheraea_pernyi           | LIFVCYDSGFK----CFTL-KADTKHPKFITLDPVHGKMYWADWHSR-AV     |       |       |             |
| XP_008180459_Acyrthosiphon_pisum  | HIGVCNNDGSV----CTVLHNKNIDKPRAVAVSPLDGLMYWTDWGN-PM      |       |       |             |
| UPI000252AABD_Apis_florea         | HIGVCNDDGSY----CTV I I KERRDKPRGLALLPSSGI FYWTEWGMN-SS |       |       |             |
| UPI0001758603_Tribolium_castaneum | -----                                                  | ----- | ----- | YWTDWGHK-PH |
| T1KD20_Tetranychus_urticae        | SIYRLNLKIARYP--QKIIDLGPEDKLRGIAVHGCRYFVYWANWNP-NAPA    |       |       |             |
| UPI0002063B8E_Apis_mellifera      | HIGVCNNDGSY----CTV I I KERRDKPRGLALLPSSGI FYWTEWGMN-SS |       |       |             |
| E2FLQ4_Bombyx_mori                | LIFVCYDSGFK----CFTL-KADTKHPKLTITLDPVHGKMYWADWHSR-PV    |       |       |             |

## LDLb

|                                |                                                     |
|--------------------------------|-----------------------------------------------------|
| <u>Bemisia_tabaci_Asia_1</u>   | IARSMDGSDFYEFVTEELHWENGLTIDHGNRRVYVVDARLGTVETVD FQ  |
| T1E9W2_Anopheles_aquasalis     | IGRARMDGSEQRIVSDGIHWENGLTLDWPNERLYVVDAAKLKQIESMRFQ  |
| P98163_Drosophila_melanogaster | IGRASMDGSRSRPIVSDNIEWENGLALDMPHQRIYVVDAAKLGSVQTVRPD |
| B4Q2Q9_Drosophila_yakuba       | IGRASMDGSRSRPIVSDNIEWENGLALDMPHQRIYVVDAAKLGSVQTVRPD |

B4IGA9\_Drosophila\_sechellia  
 K4MUW4\_Actias\_selene  
 Q1T728\_Rhyarobia\_maderae  
 O76952\_Aedes\_aegypti  
 Q6X0I2\_Solenopsis\_invicta  
 ADE34166.1\_Nilaparvata\_lugens  
 D5KXW4\_Nilaparvata\_lugens  
 BAC02725\_Periplaneta\_american  
 ADM34986.1\_1\_B\_tabaci\_B  
 CAJ19121\_Blattella\_germanica  
 H2CLV8\_Antheraea\_pernyi  
 XP\_008180459\_Acyrthosiphon\_pisum  
 UPI000252AABD\_Apis\_florea  
 UPI0001758603\_Tribolium\_castaneum  
 T1KD20\_Tetranychus\_urticae  
 UPI0002063B8E\_Apis\_mellifera  
 E2FLQ4\_Bombyx\_mori

IGRASMDGSRSRPIVSDNIEWPNGIALDMHQERIYVWDAKLGSVQTVRFPD  
 IMRAKMDGSSSEVLVESMTSFASGLALDVPNDRIYFVD---KTIKVVLLS  
 IAKAGMDGSKPKFVSSGLEYPNGIAYDYHYSRLYVWVDGKIAVIESIKLD  
 IGAAGMDGSKKRILIEQDIHWPNGLCLDWPNGRYVWVDAKLLKIESIKLD  
 IAVAGMDGKNVRIFFVNVKLEWPKSVTIDYVNERLYVWVDAKSKMIESVRLD  
 IARSMDGSDVFEFVSENLGWPNGITIDHGNQRLYVWVDAKMTTIESIRLD  
 IARSMDGSDVFEFVSENLGWPNGITIDHGNQRLYVWVDAKMTTIESIRLD  
 IARAGMDGSKPEAFISTNLHYANGLTIDHGNRRVYVWVDAKLGTVETVDFQ  
 IARAGMDGSKPEAFISTNLHYANGLTIDHGNRRVYVWVDAKLGTVETVDFQ  
 IMRAKMDGSSSEVLVESMTSFASGLALDVPNDRIYFVD---KTIKVVLLS  
 IGRSGMDGSRPQRFVTVQNIHWPNGVHVDYVVGKRIYVWVDAKMQFIESIRLD  
 ILMAGMDGKNIITVLVNDLEWPNLSLIDYVNNRLYWIDTKQKMIESIRLD  
 IARALMDGTNGSSSIFISSDIHWPNGLTIDYVNSRLYVWVDAKMLTLESIRLD  
 IQRAYLSGYNITSIIITGKIMPNNAVITIDHQLQKLYWVTDARLQDKIERCLD  
 ILMAGMDGKNIITVLVNDLEWPNLSLIDYVNNRLYWIDTKQKMIESIRLD  
 IMRAKMDGSSSEVLVESMTSFASGLALDVPNDRIYFVD---KTIKVVLLS

LDLb

Bemisia\_tabaci\_Asia\_1  
 T1E9W2\_Anopheles\_aquasalis  
 P98163\_Drosophila\_melanogaster  
 B4Q2Q9\_Drosophila\_yakuba  
 B4IGA9\_Drosophila\_sechellia  
 K4MUW4\_Actias\_selene  
 Q1T728\_Rhyarobia\_maderae  
 O76952\_Aedes\_aegypti  
 Q6X0I2\_Solenopsis\_invicta  
 ADE34166.1\_Nilaparvata\_lugens  
 D5KXW4\_Nilaparvata\_lugens  
 BAC02725\_Periplaneta\_american  
 ADM34986.1\_1\_B\_tabaci\_B  
 CAJ19121\_Blattella\_germanica  
 H2CLV8\_Antheraea\_pernyi  
 XP\_008180459\_Acyrthosiphon\_pisum  
 UPI000252AABD\_Apis\_florea  
 UPI0001758603\_Tribolium\_castaneum  
 T1KD20\_Tetranychus\_urticae  
 UPI0002063B8E\_Apis\_mellifera  
 E2FLQ4\_Bombyx\_mori

GRDRRKILTDLNDHPFAIAVFPEDKIYWSGWTNQEIVECNKFTGKNRVQVV  
 GRDRVTVLLSGVLKHPFSVAVFNDRIYWSWDWTKSIQSCDKFTGKGRQNMV  
 GTGRRTVLDGMLKHPYGLAIFEDQLYWSDWATKSVHACHKFSGKDHRILA  
 GTGRRTVLDGMLKHPYGLAIFEDQLYWSDWATKSVHACHKFSGKDHRILA  
 GTGRRTVLDGMLKHPYGLAIFEDQLYWSDWATKSVHACHKFSGKDHRILA  
 TKVVYSLFKEAHHHPYASVFPENTVYWSDWISDSIQTTDKIHSQSQRQVL  
 GSDRRILKDVVKHPYSISVFPENTLYWSDWHGRDIQACNKFTGKEHRVIV  
 GTNRVTVLADVLKHPFSIAVFNDRLYWSWDWTKSIQSCDKFNGKDRKIVV  
 GTDRRIVLHDIIQEPFSMTVPFNKLYWSDWE SNGIQTCKNFTGKDWKILV  
 GTDRRIVLNEIIVKHPYASIAVFPEDTIYWSWDWTKSIQSCDKFTGKNRKHTVI  
 GTDRRIVLNEIIVKHPYASIAVFPEDTIYWSWDWTKSIQSCDKFTGKNRKHTVI  
 GSDRRVVLKDVVKHPYASIAVFPEDTIYWSDWHGRDIQACNKFTGKDHRILV  
 GRDRRKILTDLNDHPFAIAVFPEDKIYWSGWTNQEIVECNKFTGKNRVQVV  
 GTDRRIVLNEIIVKHPYASIAVFPEDTIYWSDWQGHGTSQSCDKFTGKNRHTVI  
 TKVVYSLFKEAHHHPYASVFPENTVYWSDWISDSIQTTDKIHSQSQRQVL  
 ATDRRVIVTEYVDHPYSVTVFPEDKLYWSDWSSKEIKVCNKFTGKDSKTLI  
 GTDRRIVLKGTAKKPFSLAVPENKLYWSDWISNTIQSCDKFSGKDWETLV  
 GTDRRIVLNEIIVKHPYASIAVFPENRLYWSDWSTHSIQSCDKFTGKNRHTVI  
 GTNRRAIISKTPKHPFAAAAYGSFIFWTDWGGQGVYRADKLFNDVKAIL  
 GTDRRIVLKGIAKKPFSLAVPENKLYWSDWISNTIQSCDKFSGKDWQTLV  
 TKVVYSLFKEAHHHPYASVFPENTVYWSDWISDSIQTTDKIHSQSQRQVL

Bemisia\_tabaci\_Asia\_1  
 T1E9W2\_Anopheles\_aquasalis  
 P98163\_Drosophila\_melanogaster  
 B4Q2Q9\_Drosophila\_yakuba  
 B4IGA9\_Drosophila\_sechellia  
 K4MUW4\_Actias\_selene  
 Q1T728\_Rhyarobia\_maderae  
 O76952\_Aedes\_aegypti  
 Q6X0I2\_Solenopsis\_invicta  
 ADE34166.1\_Nilaparvata\_lugens  
 D5KXW4\_Nilaparvata\_lugens  
 BAC02725\_Periplaneta\_american  
 ADM34986.1\_1\_B\_tabaci\_B  
 CAJ19121\_Blattella\_germanica  
 H2CLV8\_Antheraea\_pernyi  
 XP\_008180459\_Acyrthosiphon\_pisum  
 UPI000252AABD\_Apis\_florea  
 UPI0001758603\_Tribolium\_castaneum  
 T1KD20\_Tetranychus\_urticae  
 UPI0002063B8E\_Apis\_mellifera  
 E2FLQ4\_Bombyx\_mori

KSRK--DKIYGVHIFHPTLQNHSLP NPC---AGKCSIDICALSPSAS----  
 HDRV---IFDVHIYHSSLHPSKSH HPCQ---NHTCSHLCLLTSNS-----  
 KDRT---IYAVHIYHPAKQPNSP HGCE--NATCSHLCLLAEPEI----  
 KDRT---IYAVHIYHPAKQPNSP HGCE--NATCSHLCLLAEPEI----  
 LKMD--TSVFGHMYHPALMKKIP HPCD--EHPCSHFCLVTSID-----  
 REKN--KPIFGIHLHYHPATMRSAN NPCE--ISGCSIDICLLAPNQ-----  
 HDRQ---IFDVHIYHSGLQPKGD HPCD--GTFCSHLCLLAPND-----  
 RNHN--KPYSVHMDHSAIKPNID NPCE--SNPQSLCMLNQNK-----  
 QDKN--RIYGIKVVHPAMHDIDQIN YCF--GAPCSIDLCLLAPERVDLRS  
 QDKN--RIYGIKVVHPAMHDIDQIN YCF--GAPCSIDLCLLAPERVDLRS  
 REKSKGDFIYGVHIYHPSMMKLV NPCD--NNWCSIDLCLLAPNK-----  
 KSRK--DKIYGVHIFHPTLQNHSLP NPC---AGKCSIDICALSPSAS----  
 REKSKKDFIYGVHIYHPSMMKLV NPCD--KADCSIDLCLLAPNR-----  
 LKMD--TSVFGHMYHPALMKKIP HPCD--EHPCSHFCLVTSID-----  
 RENK--NRVYGMQINHPSLFESQMP NPCE--QKCSIDLCLLAPKTE-----  
 NTNN--TVYGVHIYHSLVKPKIP NPCE--SKPQSLCLLNSQN-----  
 KEQK--EYIYGITIIYHPNNHKTPL NPCE--HKBQSLCLLNSQN-----  
 TKIN--NPRGIAVVAKDSDDCLK NPCE--GPFINGGCSIDLCLLNSQN-----  
 NTNN--TVYGVHIYHSLVKPKIP NPCE--SKPQSLCLLNSQN-----  
 LKMD--TSVFGHMYHPALMKKIP HPCD--EHPCSHFCLVTSID-----

EGF

Bemisia\_tabaci\_Asia\_1  
 T1E9W2\_Anopheles\_aquasalis  
 P98163\_Drosophila\_melanogaster  
 B4Q2Q9\_Drosophila\_yakuba  
 B4IGA9\_Drosophila\_sechellia  
 K4MUW4\_Actias\_selene

-----SGGKGYSCLCFDPNKTILSPSGEWCQE-QPKESSVIVSIGNFVFLQKV  
 -----TYACGCPSPGMLQPNRHTCOETAKRQSLLLGIGSYLLSLKH  
 -----GHSCACPDGMRLAPDHRRCMLMEKRQRLFLIGLQVLLIEIEH  
 -----GHSCACPDGMRLAPDQRCMLMEKRQRLFLIGLQVLLIEIEH  
 -----GHSCACPDGMRLAPDLRRCMLMEKRQRLFLIGLQVLLIEIEH  
 -----TYSACAPDEMEENKNGRCIPDDYRPLHLIVSGSRLFTKFRLL

Q1T728\_Rhyparobia\_maderae  
 076952\_Aedes\_aegypti  
 Q6X0I2\_Solenopsis\_invicta  
 ADE34166.1\_Nilaparvata\_lugens  
 D5KXW4\_Nilaparvata\_lugens  
 BAC02725\_Periplaneta\_americana  
 ADM34986.1\_1\_B\_tabaci\_B  
 CAJ19121\_Blattella\_germanica  
 H2CLV8\_Antheraea\_pernyi  
 XP\_008180459\_Acyrtosiphon\_pisum  
 UPI000252AABD\_Apis\_florea  
 UPI0001758603\_Tribolium\_castaneum  
 T1KD20\_Tetranychus\_urticae  
 UPI0002063B8E\_Apis\_mellifera  
 E2FLQ4\_Bombyx\_mori

### LDLb

Bemisia\_tabaci\_Asia\_1  
 T1E9W2\_Anopheles\_aquasalis  
 P98163\_Drosophila\_melanogaster  
 B4Q2Q9\_Drosophila\_yakuba  
 B4IGA9\_Drosophila\_sechellia  
 K4MUW4\_Actias\_selene  
 Q1T728\_Rhyparobia\_maderae  
 076952\_Aedes\_aegypti  
 Q6X0I2\_Solenopsis\_invicta  
 ADE34166.1\_Nilaparvata\_lugens  
 D5KXW4\_Nilaparvata\_lugens  
 BAC02725\_Periplaneta\_americana  
 ADM34986.1\_1\_B\_tabaci\_B  
 CAJ19121\_Blattella\_germanica  
 H2CLV8\_Antheraea\_pernyi  
 XP\_008180459\_Acyrtosiphon\_pisum  
 UPI000252AABD\_Apis\_florea  
 UPI0001758603\_Tribolium\_castaneum  
 T1KD20\_Tetranychus\_urticae  
 UPI0002063B8E\_Apis\_mellifera  
 E2FLQ4\_Bombyx\_mori

### LDLb

Bemisia\_tabaci\_Asia\_1  
 T1E9W2\_Anopheles\_aquasalis  
 P98163\_Drosophila\_melanogaster  
 B4Q2Q9\_Drosophila\_yakuba  
 B4IGA9\_Drosophila\_sechellia  
 K4MUW4\_Actias\_selene  
 Q1T728\_Rhyparobia\_maderae  
 076952\_Aedes\_aegypti  
 Q6X0I2\_Solenopsis\_invicta  
 ADE34166.1\_Nilaparvata\_lugens  
 D5KXW4\_Nilaparvata\_lugens  
 BAC02725\_Periplaneta\_americana  
 ADM34986.1\_1\_B\_tabaci\_B  
 CAJ19121\_Blattella\_germanica  
 H2CLV8\_Antheraea\_pernyi  
 XP\_008180459\_Acyrtosiphon\_pisum  
 UPI000252AABD\_Apis\_florea  
 UPI0001758603\_Tribolium\_castaneum  
 T1KD20\_Tetranychus\_urticae  
 UPI0002063B8E\_Apis\_mellifera  
 E2FLQ4\_Bombyx\_mori

Bemisia\_tabaci\_Asia\_1  
 T1E9W2\_Anopheles\_aquasalis  
 P98163\_Drosophila\_melanogaster  
 B4Q2Q9\_Drosophila\_yakuba  
 B4IGA9\_Drosophila\_sechellia  
 K4MUW4\_Actias\_selene  
 Q1T728\_Rhyparobia\_maderae  
 076952\_Aedes\_aegypti

Q6X0I2\_Solenopsis\_invicta  
 ADE34166.1\_Nilaparvata\_lugens  
 D5KXW4\_Nilaparvata\_lugens  
 BAC02725\_Periplaneta\_americana  
 ADM34986.1\_1\_B\_tabaci\_B  
 CAJ19121\_Blattella\_germanica  
 H2CLV8\_Antheraea\_pernyi  
 XP\_008180459\_Acyrthosiphon\_pisum  
 UPI000252AABD\_Apis\_florea  
 UPI0001758603\_Tribolium\_castaneum  
 T1KD20\_Tetranychus\_urticae  
 UPI0002063B8E\_Apis\_mellifera  
 E2FLQ4\_Bombyx\_mori

IEVINLNT--KAMTAFYFKDEVPKYIALAPEESKMFVAFQKSMHSIS-G  
 VEVINTINHHRKTI MNHLQGDIPRGI AVI PSEGIMVYVSLTSPT-----TA  
 VEVINTINHHRKTI MNHLQGDIPRGI AVI PSEGIMVYVSLTSPT-----TA  
 VEILSLNTMERRAILHTLEGEIPLDVAVIP EEGVMFVAFSRHVIGD---GF  
 VEVFSFFS HRRKLLDREFDDEKPFAMTLP EEEGLMFVIAKABD-----HL  
 IEILSLTTLERPVLHSP EGEVPLDIAVVP EEEGLMFIAMSRHLTSSENG  
 IEVLSLRTLHRAVVYRFDRETFV SFCVLP HYGKMLVAVMQTDNDN--RI  
 LDVLSLSTKTHTTIFKEEGHIEFAVTLV PDKSFMFVAMKEGS-----HI  
 IEVHSLNSKEKTIFYF--KDEPYDIALVPEEGIMMVVFRRDE-----LY  
 IEVYNFNTNSRKILHDTNGETPE SIALVPEEGIMFVAFRRFGQR---DG  
 -----  
 IEVHSLNSKQKTIFYF--KDEPYDIALVPEEGIMMVVFRSDG-----LY  
 IEVLSLRTLHRAVVYRFDRETFV SFCVLP HYGKMLVAVMQTDNDN--RI

LDLb

Bemisia\_tabaci\_Asia\_1  
 T1E9W2\_Anopheles\_aquasalis  
 P98163\_Drosophila\_melanogaster  
 B4Q2Q9\_Drosophila\_yakuba  
 B4IGA9\_Drosophila\_sechellia  
 K4MUW4\_Actias\_selene  
 Q1T728\_Rhyparobia\_maderae  
 O76952\_Aedes\_aegypti  
 Q6X0I2\_Solenopsis\_invicta  
 ADE34166.1\_Nilaparvata\_lugens  
 D5KXW4\_Nilaparvata\_lugens  
 BAC02725\_Periplaneta\_americana  
 ADM34986.1\_1\_B\_tabaci\_B  
 CAJ19121\_Blattella\_germanica  
 H2CLV8\_Antheraea\_pernyi  
 XP\_008180459\_Acyrthosiphon\_pisum  
 UPI000252AABD\_Apis\_florea  
 UPI0001758603\_Tribolium\_castaneum  
 T1KD20\_Tetranychus\_urticae  
 UPI0002063B8E\_Apis\_mellifera  
 E2FLQ4\_Bombyx\_mori

HIDRINM-DGSLSTLTHMTSLK--LQGP-DVALHYDSDSRRVYWADHSAG  
 HIDQLAL-TGR-GPHAHVME DR--IGSNGSIGFHVHDHDLRAVFWSDQSSG  
 HIDKIPL-SGK-GEQVHVFE DD--LGDD-DIKLVTDYETQTIFWSDSDLG  
 HIDKIPL-SGK-GEQVHVFE DD--LGDD-DIKLVTDYETQTIFWSDSDLG  
 YVDSIGL-DGD--GRRHIVTVN--IRGP-RIILRFLHGMDNVYLDENGG  
 HIDRISM-DGK-GEHTHIVESY--LEGP-TLNLYYDKMERIFWADPNSG  
 HIDRLDM-TGR-GPHLHVIEER--LSGNGS FNFVIDRDLRTVYWN DMGSS  
 TLYEMQM-NGL--GKRKLIREG--LIGP-QLPMYD RDSKTLFVSDLLPG  
 HIDKLSMASGDVMSRTHIFEEN--LRGP-FIPLFYD GMLHRMYWADSGTR  
 HIDKLSMASGDVMSRTHIFEEN--LRGP-FIPLFYD GMLHRMYWADSGTR  
 HIDRMNM-DGR-GAHTHVIETS--LDGP-IISLFYDSDLHRVFWTDBNNE  
 HIDRINM-DGSLSTLTHMTSLK--LQGP-DVALHYDSDSRRVYWADHSAG  
 HIDRITM-DGR--GRRHIVTVN--IRGP-IISLHYDKELHRVYLDENEG  
 YVDSIGL-DGD--GRRHIVTVN--IRGP-RIILRFLHGMDNVYLDENGG  
 HIDRIDM-DGSIQSLVHMVEYG--LTGD-EIALHFD MITRLLYFTDYKNG  
 HIDLMNM-NGL-GPKITIVGNKTVLIGP-KISLSYD GDFKQLFWSDDGSG  
 HVDRFLM-DGT--SRTHPIENG--LLGP--ISLYSDIHRILIADSGTR  
 -----DG-----VCIPYELTCDLI-----  
 YIDLMM-NGL-GPKITIVGNKTLIGP-KISLSYD GDFKQLFWDQDQSG  
 YVDSIGL-DGD--GRRHIVTVN--IRGP-RIILRFLHGMDNVYLDENGG

Bemisia\_tabaci\_Asia\_1  
 T1E9W2\_Anopheles\_aquasalis  
 P98163\_Drosophila\_melanogaster  
 B4Q2Q9\_Drosophila\_yakuba  
 B4IGA9\_Drosophila\_sechellia  
 K4MUW4\_Actias\_selene  
 Q1T728\_Rhyparobia\_maderae  
 O76952\_Aedes\_aegypti  
 Q6X0I2\_Solenopsis\_invicta  
 ADE34166.1\_Nilaparvata\_lugens  
 D5KXW4\_Nilaparvata\_lugens  
 BAC02725\_Periplaneta\_americana  
 ADM34986.1\_1\_B\_tabaci\_B  
 CAJ19121\_Blattella\_germanica  
 H2CLV8\_Antheraea\_pernyi  
 XP\_008180459\_Acyrthosiphon\_pisum  
 UPI000252AABD\_Apis\_florea  
 UPI0001758603\_Tribolium\_castaneum  
 T1KD20\_Tetranychus\_urticae  
 UPI0002063B8E\_Apis\_mellifera  
 E2FLQ4\_Bombyx\_mori

LIESTDINGNDRQVYR-D-VSSPLALTDVDRDLYWTS DGRPHLYYSEKAN  
 RIEMTSYEGDTRHLRY-DYLRHPVSM TVIGDELFWTGYRSQRLYWSDKHN  
 RISYSNYRVPHSQIFR-GKRRPYSLAMVHDLFWNBLGTPRIYWTHKSN  
 RISYSNYRVPHSQIFR-GKRRPYSLAMVHDLFWNBLGTPRIYWTHKSN  
 IIDYLHPEGTGRENFR-ELSTSISSMAVTENYIFWTD RRTPKLYWANIHE  
 DIRSAAKNGMDEKIYK-TGLVQPF DVSSLGHELFWTDWGYPPYVWADKYD  
 KIEFTSYEGDTRHLFR-EFLRHPV SIAIVGDSIFWTCYRSKRLYWSDKHN  
 YIYSHSAQ--DTRILR-SGKSPHSLTVAGDNLFWIB--SQNKLYSTNFR  
 RIEHTNWNGEERHTYS-ELWSSPISVTSVGTDFWSTPGFKNVYANKLE  
 RIEHTNWNGEERHTYS-ELWSSPISVTSVGTDFWSTPGFKNVYANKLE  
 EIGSAAADGMDQHVRSDVVEGSPIDIASVGRDMFVWMTWAHPYLYWASKFN  
 LIESTDINGNDRQVYR-D-VSSPLALTDVDRDLYWTS DGRPHLYYSEKSN  
 QIGSAAANGMDQHVIK-HSINNP SDVASLGRDLFWTDW GQPYIYWANKFD  
 IIDYLHPEGTGRENFR-ELSTSISSMAVTENYIFWTD RRTPKLYWANIHE  
 IIDSVEEDGDRRIIK-K-AGTVRDI VSIYD IVWVSEGSKILNWDNDV  
 RIGSTTIPGFETYILR-TGSEPVSLALLGDYLFWTDQYKSNQLYWTSKTI  
 NIESTSVEGDRRHGFR-SLQTNPIGITSLSKEVFWNRRNSKELYWADKYN  
 --SHCVNGSD-----  
 RIGSTTIPGFETYILR-TGSEPVSLAILGNLFWTDQYKSNQLYWTSKTI  
 IIDYLHPEGTGRENFR-ELSTSISSMAVTENYIFWTD RRTPKLYWANIHE

Bemisia\_tabaci\_Asia\_1  
 T1E9W2\_Anopheles\_aquasalis  
 P98163\_Drosophila\_melanogaster  
 B4Q2Q9\_Drosophila\_yakuba  
 B4IGA9\_Drosophila\_sechellia  
 K4MUW4\_Actias\_selene  
 Q1T728\_Rhyparobia\_maderae  
 O76952\_Aedes\_aegypti  
 Q6X0I2\_Solenopsis\_invicta  
 ADE34166.1\_Nilaparvata\_lugens

A--SMFVRKINMERFLR-----SPKDH--YRMFVTAI---IP  
 M--GVTKRMTIP-----MPPGVAIPERIPVAAT---QP  
 M--GPRKVIDIMEKDDPAAIMPYVPVATP---NGIPLAAS---SP  
 M--GPRKVIDIMEKDDPAAILPYVPVAMP---NGIPLAAS---SP  
 M--GPRKVIDIMEKDDPAAIMPYVPVATP---NGIPLAAS---SP  
 T--SHKIRRIELR-----AFSNS--SQLLLQTTYPSP  
 S--ESLMKRISVD-----VHS--QKLRLLVGS---RG  
 L--GVTKKTITID-----KPPYGAFPDEIVLLVS---QP  
 A--SVKQKTVFEDLSKLNNDNMTSLPGHLPYSR--DAQYVVTL---R  
 F--KGSKVLDSL N-----LVYSN--SKIFITAV---TG

D5KXW4\_Nilaparvata\_lugens F--KGSXVLDLSN--LVYSN--SKIFITAV---TG  
 BAC02725\_Periplaneta\_americana S--QSRMKRLDLD--VEEDS--DKLFLVAV---RG  
 ADM34986.1\_1\_B\_tabaci\_B A--SMPVRRKINMERFLR--SPKDH--YRMFVTAI---IP  
 CAJ19121\_Blattella\_germanica G--ESRMKRLMLD--VPKS--QMLKLVSV---RG  
 H2CLV8\_Antheraea\_pernyi T--SHKIRRIHLR--AFSNS--SQLLQTTYPSPSP  
 XP\_008180459\_Acyrtosiphon\_pisum E--DRASRALDID--NWKTD--SNLYLTVAV---NG  
 UPI000252AABD\_Apis\_florea T--KQYQKRIQLQ--TPEDL--DKMQLTGM---H  
 UPI0001758603\_Tribolium\_castaneum SGDDDYNNKKITLD--LPDDI--DMYLVSV---TP  
 T1KD20\_Tetranychus\_urticae ---ESLKLKAN---  
 UPI0002063B8E\_Apis\_mellifera T--KQYQKRIQLQ--TPENV--DKMQLTGM---H  
 E2FLQ4\_Bombyx\_mori T--SHKIRRIHLR--AFSNS--SQLLQTTYPSPSP

EGF

Bemisia\_tabaci\_Asia\_1 DKTTTRDHPCCQNNNGKCSHFCL--LTSRNF-KHVCSCPDGMMLADN-GQDC  
 T1E9W2\_Anopheles\_aquasalis IR-RQEHPCRRNAGCSHICV--AAGLYSAACVCPGMVFNNTSLSKVC  
 P98163\_Drosophila\_melanogaster VG-QESHPCQQNGGCSHICV--GEGPYHSICLCPAGFYRBDAGNRTC  
 B4Q2Q9\_Drosophila\_yakuba IG-LESHPCQQNGGCSHICV--GEGPYHSICLCPAGFYRBDAGNRTC  
 B4IGA9\_Drosophila\_sechellia VG-QESHPCQQNGGCSHICV--GEGPYHSICLCPAGFYRBDAGNRTC  
 K4MUW4\_Actias\_selene HDPLTQHPCHRDN-PCSQVCVPTYSPTNPYSYKCLCSGLVFSNG--RC  
 Q1T728\_Rhyparobia\_maderae IRTKPRHPCHRDN-PCSQVCVPTHSPTNPYSYKCLCSGLVFSNG--RC  
 O76952\_Aedes\_aegypti LQ-RYDHPCCMQNGGCSHICV--PAGMYSSACICPTGMVFNNTSLSKVC  
 Q6X0I2\_Solenopsis\_invicta KDDIPKHDCCQNNNGKCSHVCL--PSLITSFICACPDGMMLADN-NRTC  
 ADE34166.1\_Nilaparvata\_lugens LDSQRNHPCAVDNGNCSHICL--VSPKKDIMREACPDGMMLKKEG-GREC  
 D5KXW4\_Nilaparvata\_lugens LDSQRNHPCAVDNGNCSHICL--VSPKKDIMREACPDGMMLKKEG-GREC  
 BAC02725\_Periplaneta\_americana VRAQPDHPCHKNNNGGCSHICA--LALKHTVCLCPVGMVFNNTSLSKVC  
 ADM34986.1\_1\_B\_tabaci\_B DKTTTRDHPCCQNNNGKCSHFCL--LTSRNF-KHVCSCPDGMMLADN-GQDC  
 CAJ19121\_Blattella\_germanica IRAKPNHPCCQENGGCSHICA--LSQKRMVCLCPGMMLKKN-EKTC  
 H2CLV8\_Antheraea\_pernyi HDPLTQHPCHRDN-PCSQVCVPTHSPTNPYSYKCLCSGLVFSNG--RC  
 XP\_008180459\_Acyrtosiphon\_pisum IHRNIQHPCCQNNNGGCSHICL--LSEKGVKVCVCPGMVFNNTSLSKVC  
 UPI000252AABD\_Apis\_florea KTYVKEHLCKRNNNGKCSHVCL--LSNNPSSYICACPDGMMLADN-NRKC  
 UPI0001758603\_Tribolium\_castaneum RKILGLS-PCQRSNGGCSHLCL--QSHKTIVCACPDGMMLADN-NRKC  
 T1KD20\_Tetranychus\_urticae -RDCPFDFYRQINGKCSHICL--LSDGKIDCPDGM--GDEAN  
 UPI0002063B8E\_Apis\_mellifera KTYVKEHPCKRNNNGKCSHVCL--LSNNPSSYICACPDGMMLADN-NRKC  
 E2FLQ4\_Bombyx\_mori HDPLTQHPCHRDN-PCSQVCVPTHSPTNPYSYKCLCSGLVFSNG--RC

LDLa

Bemisia\_tabaci\_Asia\_1 EEIAACGAHEYHCTTGE-----CIPMSKKCDRNDPCPY-GEDETF--C  
 T1E9W2\_Anopheles\_aquasalis VRAVDC--ESRCESGE-----CLSAGKRCNGHPCDPCD-GSDERN--C  
 P98163\_Drosophila\_melanogaster VEALDC--EFRCHSGE-----CLTMNHRNCRGRRD-CVD-NSDEMN--C  
 B4Q2Q9\_Drosophila\_yakuba VEALDC--EFRCHSGE-----CLTMNHRNCRGRRD-CVD-NSDEMN--C  
 B4IGA9\_Drosophila\_sechellia VEALDC--EFRCHSGE-----CLTMNHRNCRGRRD-CVD-NSDEMN--C  
 K4MUW4\_Actias\_selene TEVARCSSEIYCHKSNI-----CVEKHKRCNGVVDCSR-GEDEEG--C  
 Q1T728\_Rhyparobia\_maderae FHPSICSDKFKCKEDNL-----CIPRDFRCNGRRD-CPS-GEDELD--C  
 O76952\_Aedes\_aegypti IDAIDC--EFGCTSGE-----CLTISKRCNGNXCAD-GSDEKG--C  
 Q6X0I2\_Solenopsis\_invicta ISHHCCSNEYKCSSEHNI-----CIQRNQLCDGTENCPN-GEDETFSE--C  
 ADE34166.1\_Nilaparvata\_lugens SVREACEERGFEGGESSVAGIVRH CIAAKKKCDGNKDCPM-GEDEDRSLC  
 D5KXW4\_Nilaparvata\_lugens SVREACEERGFEGGESSVAGIVRH CIAAKKKCDGNKDCPM-GEDEDRSLC  
 BAC02725\_Periplaneta\_americana TTPVHC--EFKCTSGE-----CIPGRMRCGKIDCPNGGDEIN--C  
 ADM34986.1\_1\_B\_tabaci\_B EEIAACGAHEYHCTTGE-----CIPMSKKCDRNDPCPY-GEDETF--C  
 CAJ19121\_Blattella\_germanica EQPVVCSDDKFKCKSDNL-----CIPRNFRCNGRRD-CQS-GEDELD--C  
 H2CLV8\_Antheraea\_pernyi MEVARCSSEIYCHKSNI-----CVEKHKRCNGVVDCSR-GEDEEG--C  
 XP\_008180459\_Acyrtosiphon\_pisum TSLGCKDEYRCYKTSYGE-----CISSESRCDFFKIDCPR-GDDEVVVK  
 UPI000252AABD\_Apis\_florea NSQTCNTGGEIKGGEHDK-----CIKSYQRCDGTLDCPS-GEDESSSF  
 UPI0001758603\_Tribolium\_castaneum IKRIDCTHEFPKSGSNS-----CIFKFRCDGERNCPN-GEDETD--C  
 T1KD20\_Tetranychus\_urticae S--CSQDMFKCPGGP-----CIPASRRCDRADCPCD-ISDELD--C  
 UPI0002063B8E\_Apis\_mellifera NSQTCNTGGEIKGGEHDK-----CIKSYQRCDGTLDCPS-GEDESSSF  
 E2FLQ4\_Bombyx\_mori TEVARCSSEIYCHKSNI-----CVEKHKRCNGVVDCSR-GEDEEG--C

LDLa

Bemisia\_tabaci\_Asia\_1 PA-----QCE--TDQFA--CFDGQKCIDAKDRCNMHPDCHDHSDE-  
 QPRHGPLEARVSVQCR-WNEFR-CADGRKCISAARRCDKVVHDCADASDE-  
 DEEHRR---KPKVLCSPNQFA-CHSGEQCVDKERRCDNRKDCNDHSDE-  
 DAEHRR---KPKVHCS-PSQFA-CHSGEQCVDKERRCDNRKDCNDHSDE-  
 DEEHRR---KPKVLCSPNQFA-CHSGEQCIDKERRCDNRKDCNDHSDE-  
 THITKK---PESQCD-PNEIL-CYG--LCVAK---DSFSPSPGKH--  
 KSD-----KCS-DTEFS-CKNGQ-CIPGDKLDDKDCIDGSD-  
 DEAGQP---KQLHCQ-YDEFM-CADKSKCIDQTRRCDHVDCTGSD-  
 RIKG-----RCK-ENQFM-CKNGD-CIRLKDRCNSRYDCDDQSD-  
 GLKDFS-----KLHCL-PGQFA-CLDGSRCIPDALLCNWHADCDHSDET  
 D5KXW4\_Nilaparvata\_lugens GLKDFS-----KLHCL-PGQFA-CLDGSRCIPDALLCNWHADCDHSDET  
 BAC02725\_Periplaneta\_americana HKV-----NCR-DDQFV-CHNGQ-CISITKKCDGSDSCRDGSDE-



```

ADM34986.1_1_B tabaci_B      PA-----QCE--TDQFA--CFDGQKCIDAKDRCNMHFDCDHDSDE--
CAJ19121_Blattella_germanica EAK-----KCL-DSQFT-CKNGQ-CISIEKLCNGERFDCLDGSDE--
H2CLV8_Antheraea_pernyi     THITKQ-----PESQCE-PNEIL-CYG--LCVAK---DSSPSPSPGKH--
XP_008180459_Acyrtosiphon_pisum LHYPN-----SCP-QSQFL-CHDKTKCLDKKXHMCDIKNDCSDGSDE--
UPI000252AABD_Apis_florea   EDFHWS-----ICKHQDQFR-CKNGE-CISKSKYCNSHYDCSDRSDE--
UPI0001758603_Tribolium_castaneum KELN-----HCF-WNNFQ-CHDGE-CIDERPKCDYKFCDCRDKSDE--
T1KD20_Tetranychus_urticae  PPPDCEIYKQSSISFNE-NAEFIRCNRTPICIHPBWIQDAQNDCLDWSDE--
UPI0002063B8E_Apis_mellifera EDFHWS-----TKHQDQFR-CKNGE-CISKSNYCNSHYDCADRSDDE--
E2FLQ4_Bombyx_mori          THITKQ-----PESQCE-PNEIL-CYG--LCVAK---DSSPSPSPATHSD

```

### LDLa

```

Bemisia_tabaci_Asia_1      ANC-----QNVTCQDSY----NFLCR-TGECVSHAVLCNNEWNCKDGDG--
T1E9W2_Anopheles_aquasalis ANCDGY--VWHEGCRRES----QFTCA-NGLCIDANGRCDDGYADCRDGDG--
P98163_Drosophila_melanogaster QHCEKF--DKSKKCHVH----QHGCN-NGKCVDSLSVCDGTNDCGDN--
B4Q2Q9_Drosophila_yakuba   QHCEKF--DKTKKCHVH----QHSN-NGKCVDSLSVCDGTNDCGDN--
B4IGA9_Drosophila_sechellia QHCEKF--DKNKKCHVH----QHGCN-NGKCVDSLSVCDGTNDCGDN--
K4MUW4_Actias_selene      SAVADLTLPLKCDWN----QFTCKESPVCISRSLLCDGAKDCPDG--
Q1T728_Rhyarobia_maderae  KNC-----QKCEET----DFQCR-TGECIDILDRCDLVPDCRDA--
O76952_Aedes_aegypti      MKCEGY--DRGTGCHHE----QHACP-DGMCIDVNTLCDGFFDCDGDG--
Q6X0I2_Solenopsis_invicta QNC-----EKFKCSN----EFQCKFTECIPKTKMCDSNPDCDLDL--
ADE34166.1_Nilaparvata_lugens LGCDSSRAPEDGRAQPNIPVCEFRCSNNECVSEARCDLQPCDSDG--
D5KXW4_Nilaparvata_lugens LGCDSSRAPEDGRAQPNIPVCEFRCSNNECVSEARCDLQPCDSDG--
BAC02725_Periplaneta_americana YYC-----FEEECNEDL----QFKCR-TGDCIVKSWYCDGSKDCEDG--
ADM34986.1_1_B tabaci_B    ANC-----QNVTCQDSY----NFLCR-IGECVSHAVLCNNEWNCKDGDG--
CAJ19121_Blattella_germanica KNC-----EKCEAI----QFKCS-SGECVDIHDRCDHYPDCTDGDG--
H2CLV8_Antheraea_pernyi   SAVADLTTPLPKCDWN----QFTCKESPVCISRSLLCDGAKDCPDG--
XP_008180459_Acyrtosiphon_pisum MDC-----LHKHTCDST----EYQCT-SGECIQRIPLCDGNPDCING--
UPI000252AABD_Apis_florea  EGC-----VKKEY----EFQCH-EGACISKYLVCGNYNDCDLDL--
UPI0001758603_Tribolium_castaneum RNCSS--IDAKKCPFG----HFMCK-SGQCINERLVCDGVKDCLEE--
T1KD20_Tetranychus_urticae ANCAPKYNNNGTCDPN----WFQCK-TGLCIPKAWKCDRDNDVNTENT--
UPI0002063B8E_Apis_mellifera EGC-----VKKEDSN----EFQCH-EGACISKYLVCGNYNDCDLDL--
E2FLQ4_Bombyx_mori       LTT-----PPLKCDWI----QFSCKESPVCISRSLLCDGAKDCPDG--

```

```

Bemisia_tabaci_Asia_1      ---SDE--ENC-----TTSTCPSN-EFRCHSGTCIPKKN
T1E9W2_Anopheles_aquasalis ---SDE--LGCCKPIAGSNSSSSSNGNGNGTTVTCAPH-MFRGNSSGQCLPRS
P98163_Drosophila_melanogaster ---SDE--LLEATSRCRCEEG-MEQCGSGSACIAGS
B4Q2Q9_Drosophila_yakuba   ---SDE--MLLEATSRCRCEEG-MEQCGSGSACIAGT
B4IGA9_Drosophila_sechellia ---SDE--LLEATSRCRCEEG-MEQCGSGSACIAGS
K4MUW4_Actias_selene      ---SDEGPDNCDTLACFDT-EFMCASGSCILKT
Q1T728_Rhyarobia_maderae  ---SDE--ENC-EGVTCRCEEG-HYRCVVGVCIPYT
O76952_Aedes_aegypti      ---SDE--VGC-----TDLTNEKSNATTGGL-MFRGNMGQCIPIKW
Q6X0I2_Solenopsis_invicta ---SDE--EDCRKVECTSN-EFKGNNGACIPNT
ADE34166.1_Nilaparvata_lugens ---SDE--LGCDAHLCDKTAQFRCRSGACIAAE
D5KXW4_Nilaparvata_lugens ---SDE--LGCDAHLCDKTAQFRCRSGACIAAE
BAC02725_Periplaneta_americana ---SDE--ENC-EEVTCRCEEG-AFKGALGQCIPEE
ADM34986.1_1_B tabaci_B    ---SDE--ENC-----TTSTCPSN-EFRCHSGTCIPKKN
CAJ19121_Blattella_germanica ---SDE--SNENVSCEPT-DEFRGHIVGVCIPKY
H2CLV8_Antheraea_pernyi   ---SDEGPDNCDTLACFDT-EFMCASGSCILKT
XP_008180459_Acyrtosiphon_pisum ---QDE--LNC-ENQSCNNTTEFRGNSSGNCIPAT
UPI000252AABD_Apis_florea  ---SDE--LNC-NKHKCDND-SFACEIGTCIPKT
UPI0001758603_Tribolium_castaneum ---EDE--ANC-VSTVCKDY-EFRQSGACIPKN
T1KD20_Tetranychus_urticae TVTSDE--QDC--TYKCHDD-QFQGNNDQDIPAD
UPI0002063B8E_Apis_mellifera ---SDE--LNC-NKHKCDND-SFACEIGTCIPKT
E2FLQ4_Bombyx_mori       ---SDEGPDNCDTLACFDT-EFMCASGSCILKT

```

### LDLa

```

Bemisia_tabaci_Asia_1      WVCDDLADACPDQSDDE--NNCSEFRKEKCT-E--FLC-QSGM-CVAQELVVCN
T1E9W2_Anopheles_aquasalis WECGTPTDCTDSSDE-HSQCHNSEKTTCTR-PGYHTCLASGVCIEGSLVCD
P98163_Drosophila_melanogaster WECGRIDCSDDGSDE-HDKCVH--RSCP-PDMQRC-LIGQCLDRSLVCD
B4Q2Q9_Drosophila_yakuba   WECGRIDCSDDGSDE-HDKCAH--RSCP-PDMHRC-LIGQCLDRSLVCD
B4IGA9_Drosophila_sechellia WECGRIDCSDDGSDE-HDKCVH--RSCP-PDMLRC-LIGQCLDRSLVCD
K4MUW4_Actias_selene      WKCDGDQDCNDASDE--IDCES--VSC-PGYYQC-RDRBCIELLKRCD
Q1T728_Rhyarobia_maderae  WVCDDGSDCVDGSDE-KD-CSP--ITCD-AGSFS-CNFRGIDRHLVCN
O76952_Aedes_aegypti      WECGNDPDCDGSDE-HDKCLT--KTDCG-AGFTKC-ALGHCIEDRLLCD
Q6X0I2_Solenopsis_invicta FVCDNDNDCEDEAAEKYS--KIACKMPKMFKC-FNGBCISDSLVCN
ADE34166.1_Nilaparvata_lugens LECNGEMDCRDASDE-HAKCNH--VRTCS-PNQITC-MNGQCIDKELKCN
D5KXW4_Nilaparvata_lugens LECNGEMDCRDASDE-HAKCNH--VRTCS-PNQITC-MNGQCIDKELKCN
BAC02725_Periplaneta_americana WVCDDGSDCVDDDTDE--QNCAP--PTCG-PGAFSC-GNGRCIDQTLVCN
ADM34986.1_1_B tabaci_B    WVCDDLADACPDQSDDE--NNCSEFRKEKCT-E--FLC-QSGM-CVAQELVVCN
CAJ19121_Blattella_germanica WVCDDGEPDCTDGTDE--LNCAP--ITCG-PDLFSC-MNGRCVDKLLVCN

```

|                                          |                                                    |
|------------------------------------------|----------------------------------------------------|
| H2CLV8 <i>Antheraea pernyi</i>           | WKCDGDQVCNDASDE--IDCES--VSK-PGYYQC-RDRECIELKRC     |
| XP_008180459 <i>Acyrtosiphon pisum</i>   | WECDEGEVDCFDGSDE-HYSGAT--KKCK-DDQFSC-TNGRCISHKFTCN |
| UPI000252AABD <i>Apis florea</i>         | WKCDGEVDCFDGSDE-SETGQR--KKCP-SEMFTC-FNGRCIDLILKCN  |
| UPI0001758603 <i>Tribolium castaneum</i> | WECDDHYDCPDFSDE-HSGCA--SCD-ASTFTC-NNGKCIDKSFVCD    |
| T1KD20 <i>Tetranychus urticae</i>        | WKCDGHNDCCDNDSDENPEVCS--KVCP-HDYFNC-TSGQCIPLYWVCD  |
| UPI0002063B8E <i>Apis mellifera</i>      | WKCDGEVDCFDGSDE-SEIGQR--KKCS-SEMFTC-FNGRCIDLILKCN  |
| E2FLQ4 <i>Bombyx mori</i>                | WKCDGDQVCNDASDE--IDCES--VSK-PGYYQC-RDRECIELKRC     |

### LDLa

|                                          |                                                    |
|------------------------------------------|----------------------------------------------------|
| <i>Bemisia tabaci</i> Asia_1             | GQTECD--GSDE--FNCDEPVPKTANKEDGFIDN--CDEEKE-----    |
| T1E9W2 <i>Anopheles aquasalis</i>        | GNDDCGD--GSDE--ESC SHHEQQDTI-----CAHPDKANASL       |
| P98163 <i>Drosophila melanogaster</i>    | GHNDCCGD--KSDE--LNC GTSSTMNIS-----CAED-Q-----      |
| B4Q2Q9 <i>Drosophila yakuba</i>          | GHNDCCGD--KSDE--LNC GTSSTVNI S-----CAED-Q-----     |
| B4IGA9 <i>Drosophila sechellia</i>       | GHNDCCGD--KSDE--LNC GTSSTVNI S-----CAED-Q-----     |
| K4MUW4 <i>Actias selene</i>              | GHQDCFD--YSDE--EECDEPVAVEEPKIHRR-----CAWE-E-----   |
| Q1T728 <i>Rhyarobia maderae</i>          | GDNDCCGD--YSDE--MECKRPTMVV-----CQPT-E-----         |
| O76952 <i>Aedes aegypti</i>              | GNNDCGD--NSDE--LNC KVELEP-----CVGLEDDNPTK          |
| Q6X0I2 <i>Solenopsis invicta</i>         | GINDCND--GSDE--VHCLSNVTTHLVN-----CSLN-E-----       |
| ADE34166.1 <i>Nilaparvata lugens</i>     | GRNDCCD--ASDE--QSC PQRPIAHIPVFANTGASSPECDTRFE----- |
| D5KXW4 <i>Nilaparvata lugens</i>         | GRNDCCD--ASDE--QSC PQRPIAHIPVFANTGASSPECDTRFE----- |
| BAC02725 <i>Periplaneta americana</i>    | NVDDCCGD--RSDE--DPC RKPANEEERLSVIL-----CKEG-E----- |
| ADM34986.1_1_B <i>tabaci</i> _B          | GQTECD--GSDE--FNCDEPVPKTANKEDGFIDN--CDEEKE-----    |
| CAJ19121 <i>Blattella germanica</i>      | HNDCCGD--SSDE--ITCKHASSVV-----CAQT-E-----          |
| H2CLV8 <i>Antheraea pernyi</i>           | GHQDCFD--YSDE--EECDEPVAVEEPKIHRR-----CAWE-E-----   |
| XP_008180459 <i>Acyrtosiphon pisum</i>   | GKDDCCGD--SSDE--NGCSSNHAYMTKRVSQV-----CNEKTE-----  |
| UPI000252AABD <i>Apis florea</i>         | GISECED--DSDE--KYCNDKSTNNYVN-----CTAD-E-----       |
| UPI0001758603 <i>Tribolium castaneum</i> | KENDCCD--NSDE--LSCVMENS-----CDLS-E-----            |
| T1KD20 <i>Tetranychus urticae</i>        | GEIDCHDANGSDENLPEGCNFK-----CKFN-E-----             |
| UPI0002063B8E <i>Apis mellifera</i>      | GISECED--DSDE--KYCNDKRNNNIN-----CTAD-E-----        |
| E2FLQ4 <i>Bombyx mori</i>                | GHQDCFD--YSDE--EECDEPVVVEEPKIHRR-----CAER-E-----   |

### LDLa

|                                          |                                                       |
|------------------------------------------|-------------------------------------------------------|
| <i>Bemisia tabaci</i> Asia_1             | FMCEPG----KCNILIFKCN GAKDCENGADE-LNC-IG-CE--Q-FTCN    |
| T1E9W2 <i>Anopheles aquasalis</i>        | FYCTRSS----HCFDASARCN GTAECPHGEDE-TDC-PG-CAHQE-FACA   |
| P98163 <i>Drosophila melanogaster</i>    | YQCTSNLK---ICLPS TVRCNGTTECPRGEDE-ADC-GDVC-SIYE-FKCR  |
| B4Q2Q9 <i>Drosophila yakuba</i>          | FQCTSNLK---ICLPS AVRCNGTTECPRGEDE-ADC-GDVC-SIYE-FKCR  |
| B4IGA9 <i>Drosophila sechellia</i>       | FQCTSNLK---ICLPS AVRCNGTTECPRGEDE-ADC-GDVC-SIYE-FKCR  |
| K4MUW4 <i>Actias selene</i>              | YSCERNRS---ICLPI TARCNMKTDCPGGTDE-IGC-DYRCTPHGMFGCK   |
| Q1T728 <i>Rhyarobia maderae</i>          | IPCLSHNKTVI SCVPS SARCN DVAECP LGDE-RAC-DK-CLDFQ-FRCS |
| O76952 <i>Aedes aegypti</i>              | YLCPRSG----KCLDI AVRCNGTAECPDGEDE-AGC-SN-CGLQE-FQCK   |
| Q6X0I2 <i>Solenopsis invicta</i>         | YRCLGTD----ICLPKNVRC D GKNDCPQSDDE-QNC-TY-CFENE-FACD  |
| ADE34166.1 <i>Nilaparvata lugens</i>     | FECERG----HCIPSSARCN HTSECSNGRDE-LNC-MG-CHHDQ-FQCK    |
| D5KXW4 <i>Nilaparvata lugens</i>         | FECERG----HCIPSSARCN HTSECSNGRDE-LNC-MG-CHHDQ-FQCK    |
| BAC02725 <i>Periplaneta americana</i>    | YTCBPHGKNVT ICLPS SGRCN GTAECP LGDE-RGC-G--QDFQ-FTCY  |
| ADM34986.1_1_B <i>tabaci</i> _B          | FMCEPG----KCNILIFKCN GVKDCENGADE-LNC-IG-CE--Q-FTCN    |
| CAJ19121 <i>Blattella germanica</i>      | ITCTSHNKSVI SCVPS SARCN DIPDCP LGDE-RGC-EK-CMDFQ-FKCN |
| H2CLV8 <i>Antheraea pernyi</i>           | YSCERNRS---ICLPI TARCNMKTDCPGGTDE-IGC-DYRCTPHGMFGCK   |
| XP_008180459 <i>Acyrtosiphon pisum</i>   | FECENTMG---HCIP I KRCNGTSECKHLEDE-LNC-G--CQKSNFECQ    |
| UPI000252AABD <i>Apis florea</i>         | YKCFDSD---ICLPKQFRCDGIKNC PKNDDE-RDC-AR-CNEAE-YVCE    |
| UPI0001758603 <i>Tribolium castaneum</i> | FSCSLHHTH---ICLPD SARCN GTSECPHHEDE-QNC-SN-CQVDE-FSCN |
| T1KD20 <i>Tetranychus urticae</i>        | FSCKNH----QCILKFKFYCDGDDDCGD KSDPEPNCRSSKCLSDQ-FECM   |
| UPI0002063B8E <i>Apis mellifera</i>      | YKCFDSD---ICIPKRFRCDGIKNC PKNDDE-RDC-AR-CNEAE-YVCE    |
| E2FLQ4 <i>Bombyx mori</i>                | YSCERNRS---ICLPI TARCNMKTDCPGGTDE-IGC-DYRCTPHGMFGCK   |

### LDLa

|                                        |                                                      |
|----------------------------------------|------------------------------------------------------|
| <i>Bemisia tabaci</i> Asia_1           | NGK-CITYDLV CNDDDCGDSSDERPLNSCPD SKENPAIVPAHIP-NVCH  |
| T1E9W2 <i>Anopheles aquasalis</i>      | NGQ-CIPREWRCKELDCADGSDEW NCTVTD RGT HES PQH-----JLCA |
| P98163 <i>Drosophila melanogaster</i>  | SGRECIREFRCDGQKDCGDGSDELSCELEKGNHNQSQIQPWSTSSRSCR    |
| B4Q2Q9 <i>Drosophila yakuba</i>        | SGRQCIREFRCDGQKDCGDASDELSCELEKGNRNQSQIQPWSTSSRACR    |
| B4IGA9 <i>Drosophila sechellia</i>     | SGRECIREFRCDGQKDCGDGSDELSCELEKGNHNQSQIQPWSTSSRACR    |
| K4MUW4 <i>Actias selene</i>            | QQIRCLAMNRC DGNK EYDNGSDETPDACA LVNRTSHLYPVMLYPAAECR |
| Q1T728 <i>Rhyarobia maderae</i>        | NGR-CIPQEWTC D KTD DDCDGSDEDPVLCHEHSTQQST-----P-GPCR |
| O76952 <i>Aedes aegypti</i>            | SGK-CIRKEWRCDKEVDCDDGSDEVD CVNGTAAEHLEHV-----VACG    |
| Q6X0I2 <i>Solenopsis invicta</i>       | NKR-CIPELWCKANDCGD NSDEKNC DGSKRNFIES-----NEC-       |
| ADE34166.1 <i>Nilaparvata lugens</i>   | NER-CIYHTWVCDKKNDCGD NSDEEALCKTRKGNADQSVATKSD-TRCF   |
| D5KXW4 <i>Nilaparvata lugens</i>       | NER-CIYHTWVCDKKNDCGD NSDEEALCKTRKGNADQSVATKSD-TRCF   |
| BAC02725 <i>Periplaneta americana</i>  | NGK-CIPSEWVCDGINDCGDGSDENNARCQLPSSVGTB-----GPCT      |
| ADM34986.1_1_B <i>tabaci</i> _B        | NGK-CITYDLV CNDDDCGDSSDERPLNSCPD SKENPAIVPAHIP-NVCH  |
| CAJ19121 <i>Blattella germanica</i>    | DGR-CIYFEDWCTDKDCADGSDENQMHCSQSVETGT-----P-GPCT      |
| H2CLV8 <i>Antheraea pernyi</i>         | QQIRCLAMNRC DGNK EYDNGSDETPDACA LVNRTSHLYPVMLYPAAECR |
| XP_008180459 <i>Acyrtosiphon pisum</i> | NKR-CVLKDWLCKHDDCGDGSDESQKACDMLSEHLSNSVSS--KDCD      |

UPI000252AABD\_Apis\_florea NKK-CIEKSWVCDRVDGCGDGSDEERNCDGSNWRNTNSVSMI-----RNC K  
 UPI0001758603\_Tribolium\_castaneum NTK-CIPREWICDHSDDCGDGSDEVESLNCNHTIPEHATN-----FSCI  
 T1KD20\_Tetranychus\_urticae NKK-CIEKSLWICNGBVDFCPGSGDESDDLRCNNNNTS--- --NLCP  
 UPI0002063B8E\_Apis\_mellifera NKK-CIEKSWVCDRIDDCGDSDEERNCDGSNWKMNSISMV-----SNCK  
 E2FLQ4\_Bombyx\_mori QQIRCLAMNRVCDENKEDDGSDETFDACAALVNRRTSHLYPVMLYPAAECR

## LDLa

Bemisia\_tabaci\_Asia\_1  
 T1E9W2\_Anopheles\_aquasalis -G-FVCKN--GECLDDFSLVCNKKQDKDGSDEGGRCGSSCDVTAN--C  
 P98163\_Drosophila\_melanogaster VDEFECSA--GECV-DVALCDGKADCSNGRDEGASCSSACPGGRGP--C  
 B4Q2Q9\_Drosophila\_yakuba PHLFDQD--GECV-DLSRVCNNFPDCTNGHDEGPKCATA CRSASGRQVC  
 B4IGA9\_Drosophila\_sechellia PHLFDQD--GECV-DLSRVCNNFPDCTNGHDEGPKCATA CRSASGRQVC  
 K4MUW4\_Actias\_selene -DGFLCGN--GQCI-EWABVCDRTFNCFDGSDESIHCFSA CDNNT---C  
 Q1T728\_Rhyparobia\_maderae -E-YSCKN--GDCI-SMSFVCDGRKDCSDGSDEGGLCDSSCLGKDP--C  
 O76952\_Aedes\_aegypti EGTFECKP--GVCIE-MSQVCGNGKDCDDGKDEGKGCDDACAKSP---C  
 Q6X0I2\_Solenopsis\_invicta -DEFKCSV--GTCL-PYSKVCNDRDCEFDGSDEITGKCCQTA CTVNF--C  
 ADE34166.1\_Nilaparvata\_lugens -GSFRCADSASECI-HTDKVCNNEKDCSDGSDEGGMCDKGCESAG---C  
 D5KXW4\_Nilaparvata\_lugens -GSFRCADSASECI-HTDKVCNNEKDCSDGSDEGGMCDKGCESAG---C  
 BAC02725\_Periplaneta\_americana -D-YACND--GQCI-SLSIACNKRNCEDGSDEGGQCDIACNAKSP---C  
 ADM34986.1\_1\_B\_tabaci\_B -G-FVCKN--GECLDDFSLVCNKKQDKDGSDEGGRCGSSCDVTAN--C  
 CAJ19121\_Blattella\_germanica -E-YSCDN--GACV-DLSLVCNQRQDCSDGSDEGGMCDKGCESAG---C  
 H2CLV8\_Antheraea\_pernyi -DGFLCGN--GQCI-EWABVCDRTFNCFDGSDESIHCFSA CDNNT---C  
 XP\_008180459\_Acyrthosiphon\_pisum -G-YLCKN--QECIE-PLDQACNKKINCEDGSDEGDLGGLS CIHMD---C  
 UPI000252AABD\_Apis\_florea -E-FKCSN--GTCL-PFNKVCNDRDCEFDGSDEITGKCCQTA CTVNF--C  
 UPI0001758603\_Tribolium\_castaneum -DRFRCRN--GNCI-DLSLVCNKEPCNCDGSDEEGLCNCSALNNP--C  
 T1KD20\_Tetranychus\_urticae ADNFDQCAN--GNCV-LPDVLCNDRDCEFDGSDEITGKCCQTA CTVNF--C  
 UPI0002063B8E\_Apis\_mellifera -E-FKCSN--GTCL-PFNKVCNDRDCEFDGSDEITGKCCQTA CTVNF--C  
 E2FLQ4\_Bombyx\_mori -DGFLCGN--GQCI-EWABVCDRTFNCFDGSDESIHCFSA CDNNT---C

## EGF

Bemisia\_tabaci\_Asia\_1  
 T1E9W2\_Anopheles\_aquasalis SQICRDKPFGNGHECACVPGFKIAEDGRDCEIDIDEC TELEP- CSQMCFNITYG  
 P98163\_Drosophila\_melanogaster TQKCTKTPAGAVCSCEGAYALQGDGRKSCADLNECQTGTTP-CAQICANVPG  
 B4Q2Q9\_Drosophila\_yakuba QHKCRATPAGAVCSCEGAYALQGDGRKSCADLNECQTGTTP-CAQICANVPG  
 B4IGA9\_Drosophila\_sechellia QHKCRATPAGAVCSCEGAYALQGDGRKSCADLNECQTGTTP-CAQICANVPG  
 K4MUW4\_Actias\_selene AHACQATPLGPRCLCPAGYSAAPDRRTCADVDECRAG-L-CSQACVNTPG  
 Q1T728\_Rhyparobia\_maderae EDICLKTTPRGPRCKCSHGFPALLSDGSRCCQDIDEC DM-QA-CAQVCHNKP  
 O76952\_Aedes\_aegypti EHKCIKTPGTGATCCREGEFTLAPNKKSCLDVDECAEGRP-CAQQCRNTFG  
 Q6X0I2\_Solenopsis\_invicta KGMCYKTPAGAVCSCEGAYALQGDGRKSCADLNECQTGTTP-CAQICANVPG  
 ADE34166.1\_Nilaparvata\_lugens SDTCQRTPHGPKCCQGFELSGDAKTCVDIDECATEEY-CSQYCSNTPG  
 D5KXW4\_Nilaparvata\_lugens SDTCQRTPHGPKCCQGFELSGDAKTCVDIDECATEEY-CSQYCSNTPG  
 BAC02725\_Periplaneta\_americana DQICQPTLAAQDANVHKGYVLS SDGAKCGDIDEC EIGGA-CAQVCHNTRG  
 ADM34986.1\_1\_B\_tabaci\_B SQICRDKPFGNGHECACVPGFKIAEDGRDCEIDIDEC TELEP- CSQMCFNITYG  
 CAJ19121\_Blattella\_germanica QQVCMKTPRPGQCCCKGFKLLNGAKCQDINECESQ-V-CAQVCHNTPG  
 H2CLV8\_Antheraea\_pernyi AHACQATPLGPRCLCPAGYSAAPDRRTCADVDECRAG-L-CSQACVNTPG  
 XP\_008180459\_Acyrthosiphon\_pisum SHTCQETPKGGKCCREGEYKLAQDGITCRDINECEDDNL-CTQYCTNSDG  
 UPI000252AABD\_Apis\_florea TNMCHKTPTPGVCRCRNGYHLSNDLKTCEIDIDEC KKN-V-CSQICHNTNG  
 UPI0001758603\_Tribolium\_castaneum SQICVKTPTGPTKCCQGGYQLRGDGHTCEIDINECAEHPVPSQICHNSEG  
 T1KD20\_Tetranychus\_urticae SQICEDMPTIGYKCCSHAGFEAIDGKIDCEIDIDEC KVDPR-CSQICRNTYG  
 UPI0002063B8E\_Apis\_mellifera TNMCHKTPTPGVCRCRNGYHLSNDLKTCEIDIDEC KQN-I-CSQICHNTNG  
 E2FLQ4\_Bombyx\_mori AHACQATPLGPRCLCPAGYSAAPDRRTCADVDECRAG-L-CSQACVNTPG

## Calcium binding EGF

Bemisia\_tabaci\_Asia\_1  
 T1E9W2\_Anopheles\_aquasalis SYTCACLGPDYIKKSDG-SCKATGP-KLQYVFATGYQIRTISYLMTD-VK  
 P98163\_Drosophila\_melanogaster SYRCS-CYDGYMLKPDKMTCKATGA-NYIILYARYDKVRKFEIKPPT-VT  
 B4Q2Q9\_Drosophila\_yakuba GYQCQC-HADFMLRQDRVSCKSLQS-GATLLFSSFNEVRNLSEQPVM-LN  
 B4IGA9\_Drosophila\_sechellia GYQCQC-HADFMLRQDRVSCKSLQS-GATLLFSSFNEVRNLSEQPVM-LN  
 K4MUW4\_Actias\_selene SFLCSC-HHGYALRSDRRSCKAVTG-NMSILYVSGNTVRSVSDGYG--A  
 Q1T728\_Rhyparobia\_maderae SFSCAC-DPGFELRSDRISCKAVGR-GKEFLFVTGKEIRRVTHELRF-VK  
 O76952\_Aedes\_aegypti SYRCS-CNPGFMLRSDKISCKAVGP-SRYVLYTSYNQIRKLEVNPPS-IR  
 Q6X0I2\_Solenopsis\_invicta SYECFC-KDEFIIRNDKTSCKAVGP-AMEFITVTDNDIRKMTNHLSTTQ  
 ADE34166.1\_Nilaparvata\_lugens AFRCSCKAPEYVLRNMGSCAKGG-EMQFIYSVYNEIRTMSGWHSY-LG  
 D5KXW4\_Nilaparvata\_lugens AFRCSCKAPEYVLRNMGSCAKGG-EMQFIYSVYNEIRTMSGWHSY-LG  
 BAC02725\_Periplaneta\_americana SFSCSC-HPGFQLRSDHVSCKALGE-PMQFIFSAAGNQIRKVSHELRF-TD  
 ADM34986.1\_1\_B\_tabaci\_B SYTCACLGPDYIKKSDG-SCKATGP-KLQYVFATGYQIRTISYLMTD-VK  
 CAJ19121\_Blattella\_germanica SFSCIC-DAGFELRSDRISCKAIGK-AKEFIFVADKQIRRVTHELRF-MK  
 H2CLV8\_Antheraea\_pernyi SFLCSC-HHGYAPRSDRRSCKTVTG-NMSILYVSGNTVRSVSDGYG--A  
 XP\_008180459\_Acyrthosiphon\_pisum SYSCSCLNSDIYLRADKSSCKAIGP-TMDLVYVSGVDEIRSTGDIKE-SK  
 UPI000252AABD\_Apis\_florea SFTSCC-YEGYVIRSDKTSCKVAGS-QMEIITVSGVDIRKLSPLNLS-IE  
 UPI0001758603\_Tribolium\_castaneum SYSCDC-YEGFALRTDRSCKAKGT-AMSLIFSSNNQIREISQLENS-LK

T1KD20\_Tetranychus\_urticae  
 UPI0002063B8E\_Apis\_mellifera  
 E2FLQ4\_Bombyx\_mori

SYS CSC - VPGYYSANNGS SCKANS D I E P Y L L F A D R Y S I A Y S D L K G H N - L R  
 S F I C S C - Y E G Y V I R S D K T S C K V A G S - Q M E I I I V S D T H I R K L S S N L N S - I E  
 S F L C S C - H H G Y A L R S D R R S C K A V T G - N M S I L Y V S G N T V R S V S A D G Y G - - A

Bemisia\_tabaci\_Asia\_1  
 T1E9W2\_Anopheles\_aquasalis  
 P98163\_Drosophila\_melanogaster  
 B4Q2Q9\_Drosophila\_yakuba  
 B4IGA9\_Drosophila\_sechellia  
 K4MUW4\_Actias\_selene  
 Q1T728\_Rhyarobia\_maderae  
 076952\_Aedes\_aegypti  
 Q6X0I2\_Solenopsis\_invicta  
 ADE34166.1\_Nilaparvata\_lugens  
 D5KXW4\_Nilaparvata\_lugens  
 BAC02725\_Periplaneta\_americana  
 ADM34986.1\_1\_B\_tabaci\_B  
 CAJ19121\_Blattella\_germanica  
 H2CLV8\_Antheraea\_pernyi  
 XP\_008180459\_Acyrthosiphon\_pisum  
 UPI000252AABD\_Apis\_florea  
 UPI0001758603\_Tribolium\_castaneum  
 T1KD20\_Tetranychus\_urticae  
 UPI0002063B8E\_Apis\_mellifera  
 E2FLQ4\_Bombyx\_mori

V A Y Y S A D L - - E V S G F D V N M R T E H V Y W S - S E N K G V I T K M S L T H R H E P K H F -  
 T L A R A T S S - - R I T S M D A N M H Q G K L Y Y T - A E N T S A I F E T D L M - G N E S R I V -  
 V A W S A N D S - - R I T G F D L A M H R Q M G Y F S - A E D E G I V Y Q I D L - - - Q T K V I -  
 V A W S A N D S - - R I T G F D V D M H R Q M G Y F S - A E D E G I V Y Q V D L - - - Q T K L I -  
 V A W S A N D S - - R I T G F D L D M H R Q M G Y F S - V E D E G I V Y Q I D L - - - Q T K V I -  
 I E Y S D P D L - G D I T D L D F N V R T K R L Y V T - S T E S G K L I E L N V - - - T H D V V A -  
 V A Y P D N D F - - Q V T G L D A D S Q L O M V Y W S - V G A A N A I F S M S L - - I G G K K T Q -  
 I L M Q A N G S - - R I T S M D V D I R R Q M L Y F T - D E Y N P V I Y E H D M - - E R N T T H V -  
 L L F P L M G V - - R V S G L D V N A V S D S V Y W S - N D E F P G T I K K L N I - - R T N E I V T -  
 I V H S D P D Y R A R V A G L T A D V A R K H V Y W T - T T T N D S V F Q I S M - - - D N R R M -  
 I V H S D P D Y R A R V A G L T A D V A R K H V Y W T - T T T N D S V F Q I S M - - - D N R R M -  
 V V Y P E A E L - - K V T G L D V D S A S N E V Y W S - T D V T S T I Y R L S L - - R G E T K A Y -  
 V A Y Y S A D L - - E V S G F D V N M R T E H V Y W S - S E N K G V I T K M S L T H R H E P K H F -  
 I A Y L D Y D F - - K V T G L D V D S K L G M V Y W S - S D E T N T I Y R M S L - - I G G T K A Y -  
 I E Y S D P D L - G D I T D L D F N V R T K R L Y V T - S T E S G K L I E L N V - - - T H D V V A -  
 L I F S M P G M - - T I S S L D I D I R N L I Y W T - S K Q A G V L I C M D M - - Q Q H K F Y -  
 L I Y K E V D F - - E I N G I D V N T R E D T I Y W S - N E M L G M I N K I H V - - K T K E R K T -  
 M L Y S E E T P - - R I T S L D V G L T S G A I Y F T - V E N S N A I L K I N K - - G D T K R E Y -  
 L K V H N L T - - - N A I G L D F D W E E K C I Y W S E V S Q A G S S I N K A C S K D H N D T L L P  
 F I Y K E I D F - - E I N G I D V N T R E D T I Y W S - N E M L G M I N K I H V - - K T K E R K T -  
 I E Y S D P D L - G D I T D L D F N V R T K R L Y V T - S T E S G K L I E L N V - - - T H D V V A -

LDLb

Bemisia\_tabaci\_Asia\_1  
 T1E9W2\_Anopheles\_aquasalis  
 P98163\_Drosophila\_melanogaster  
 B4Q2Q9\_Drosophila\_yakuba  
 B4IGA9\_Drosophila\_sechellia  
 K4MUW4\_Actias\_selene  
 Q1T728\_Rhyarobia\_maderae  
 076952\_Aedes\_aegypti  
 Q6X0I2\_Solenopsis\_invicta  
 ADE34166.1\_Nilaparvata\_lugens  
 D5KXW4\_Nilaparvata\_lugens  
 BAC02725\_Periplaneta\_americana  
 ADM34986.1\_1\_B\_tabaci\_B  
 CAJ19121\_Blattella\_germanica  
 H2CLV8\_Antheraea\_pernyi  
 XP\_008180459\_Acyrthosiphon\_pisum  
 UPI000252AABD\_Apis\_florea  
 UPI0001758603\_Tribolium\_castaneum  
 T1KD20\_Tetranychus\_urticae  
 UPI0002063B8E\_Apis\_mellifera  
 E2FLQ4\_Bombyx\_mori

- - - - - I T G L R - - R P S E L A V D W I T H N L Y F V Q - - - A R N T I N V C N F H L E R C A  
 - - - - - L R S V G - - K P E K L A V D W V A N N V Y F I D G - - S E P S I K V C S I G R A N C A  
 - - - - - V R A L G L P A P T K L S V D W V T G N V Y V L S - - - G A Q E I Q A C S F V G R M C G  
 - - - - - T R A L G L P T P T K L S V D W V T G N V Y V L S - - - G A Q E I Q A C S F E G R M C G  
 - - - - - V R A L G L P A P T K L S V D W A T G N V Y V L S - - - G A Q D I H A C S F V G R M C G  
 - - - - - V T N V G - - R P T R V A V D W V T G N V Y F A D S T P G A S C V R V C D V T R R R C A  
 - - - - - M K G I G - - N P A D I A V D W I T H N V Y Y I D K D - A I Q T I K V C N L D D Q L H A  
 - - - - - L Y N V G - - H P E H L A V D W I T G N V Y F Y D R - - S E P S I K L C S V Q R Q L C S  
 - - - - - V K I V E - - H P Q A L A V D W I T G N V Y V N D N S - H L N T I K V C N L E K Q K C A  
 - - - - - I R S A H I I R P S R L A I D W I T G N V Y V V E - - - A A T Q I T A V N F E K R T H A  
 - - - - - I R S A H I I R P S R L A I D W I T G N V Y V V E - - - A A T Q I T A V N F E K R T H A  
 - - - - - A T G I G - - T P G D I A V D W I S R N V Y Y V D K S - T P Q A I R A C N L D E H R C A  
 - - - - - I T G L R - - R P S E L A V D W I T H N L Y F V Q - - - A R N I I N V C N F H L E R C A  
 - - - - - L T G I G - - S P T D I A L D W I T G N V Y Y V D K D - T I Q S I K V C N L D S Q Q H A  
 - - - - - V T N V G - - R P T R V A V D W V T G N V Y F A D S T P G A S C V R V C D V T R R R C A  
 - - - - - M T D L L - - H P T L V R I D W L T G N V Y F V Q - - - N F K D I V V C Y L N A K R C A  
 - - - - - V T G L G - - R P E A L A V D W I T G N V Y F N D N D - Y T S S I Q V C N L E Q K K C A  
 - - - - - L E N V G - - Q P C K I T L D W R T N N I Y Y F N N A P T T K S I G L C N F N D K T C A  
 P S S V V K I H T V H I Q S P D G L A V D W F A K N L Y W S D K - - G R T I E V S K L D G S F R K  
 - - - - - V T G L G - - R P E A L A V D W I T G N V Y F N N D - Y S S I E V C N L E Q K K C A  
 - - - - - V T N V G - - R P T R V A V D W V T G N V Y F A D S T P G A S C V R V C D V T R R R C A

LDLb

Bemisia\_tabaci\_Asia\_1  
 T1E9W2\_Anopheles\_aquasalis  
 P98163\_Drosophila\_melanogaster  
 B4Q2Q9\_Drosophila\_yakuba  
 B4IGA9\_Drosophila\_sechellia  
 K4MUW4\_Actias\_selene  
 Q1T728\_Rhyarobia\_maderae  
 076952\_Aedes\_aegypti  
 Q6X0I2\_Solenopsis\_invicta  
 ADE34166.1\_Nilaparvata\_lugens  
 D5KXW4\_Nilaparvata\_lugens  
 BAC02725\_Periplaneta\_americana  
 ADM34986.1\_1\_B\_tabaci\_B  
 CAJ19121\_Blattella\_germanica  
 H2CLV8\_Antheraea\_pernyi  
 XP\_008180459\_Acyrthosiphon\_pisum  
 UPI000252AABD\_Apis\_florea  
 UPI0001758603\_Tribolium\_castaneum  
 T1KD20\_Tetranychus\_urticae  
 UPI0002063B8E\_Apis\_mellifera

Q I I T A E S G L E I N S L A V D P V R G V L F W S E T S R I V W N M P K S T I R R A D M N G K N I  
 R L V T F M R Q N F L K A L C V D P V N S T - - - - - - - - - - - - - - - - - - - - - - - -  
 R I V H V K S P R H V K H L A V D G Y H A R I F Y I V I R T E G Y Q T S S E I H M A R L D G S R R  
 R I V H V K S P R H V K H L A V D G Y H A R I F Y I V I R T E G Y Q T S S E I H M A R L D G S R R  
 R I A H V K S P R H V K H L A V D G Y H A R I F Y I V I R T E G Y Q T S S E I H M A R L D G S R R  
 R L Q K I P S D A T V K A L I V E P A S R R M F Y C - - - - V Q R G H S V V W S A S L S G R S A  
 K V M D V S N G F S A S R L A V D P F H G F L F W V E V N K W R I D V P A S V L L R A D M N G E N R  
 R I I T F A S Q V F V K A V V D P V N R L L F Y S L M H F W I F Q V P H S I I Y R A D M D G Q N Q  
 T L V K I Q D K M K V A S V I V D S I N R W L F W A E I S L E A - D H P T S K I C R T D M T G A D M  
 R L Y K S D P A K D I E A L A V D P V T R T M F W S E - - R L A H K I Q F S A I Y R A D T S G S G L  
 R L Y K S D P A K D I E A L A V D P V T R T M F W S E - - R L A H K I Q F S A I Y R A D T S G S G L  
 K V L V I E H G F S V P K I A V D P I A G F I F W P E V T K W V F G E P S T D L F R S E L T G R H K  
 Q I I T A E S G L E I N S L A V D P V R G V L F W S E T S R I V W N M P K S S I R R A D M N G K N I  
 T V V H V D S G Y S A S R I A V D P F A G F I F W I E I S T W N I E I P K S I L I R A D M S G E N R  
 R L Q K I P S D A T V K A L I V E P A S R R M F Y C - - - - V Q R G H S V V W S A S L S G R S A  
 T I Y S A N I H T T I M A F E I D P R S G V M F W S E T I W A V F S T P T I I R K S D C S G Y N V  
 K I V S I A G K N R V I S I A V E P K K G W L F W S Q T S W A F Y D R P M S K I Y R S N T M G N N A  
 N L I P V D T H R Q V S A L V D P I N N V L F Y S L V S W W I F N S P S Y I Y K T N L D G T G G  
 I L L K D D L Q L B - R A I A L D P S E G Y M Y W T D - - - - W G E N Y - I G K S M D G S N G  
 K I V S I A G K N H V I S I A V E P R K G W L F W S Q T S W A F Y D R P M S K I Y R S N T M G N N A

## LDLb

Bemisia tabaci Asia 1  
T1E9W2\_Anopheles\_aquasalis  
P98163\_Drosophila\_melanogaster  
B4Q2Q9\_Drosophila\_yakuba  
B4IGA9\_Drosophila\_sechellia  
K4MUW4\_Actias\_selene  
Q1T728\_Rhyparobia\_maderae  
O76952\_Aedes\_aegypti  
Q6X0I2\_Solenopsis\_invicta  
ADE34166.1\_Nilaparvata\_lugens  
D5KXW4\_Nilaparvata\_lugens  
BAC02725\_Periplaneta\_americana  
ADM34986.1\_1\_B\_tabaci\_B  
CAJ19121\_Blattella\_germanica  
H2CLV8\_Antheraea\_pernyi  
XP\_008180459\_Acyrthosiphon\_pisum  
UPI000252AABD\_Apis\_florea  
UPI0001758603\_Tribolium\_castaneum  
T1KD20\_Tetranychus\_urticae  
UPI0002063B8E\_Apis\_mellifera  
E2FLQ4\_Bombyx\_mori

E T I V S A N V S Y A L D L A L D P I L N H V Y W V D K T L K V I E R A N Y D G T - - - - - R R R V  
- - - - -  
D M L L Q R S E S F M T A L T T D P H Q Q L L Y F V D Q H M R T L E R I S Y R L K T G P M R R P E I  
D M L L Q R G E S F M T A L T T D P H Q Q L L Y F V D Q H T R T L E R I S Y R F K M G P L R R P E I  
D M L V Q R S E S F M T A L T T D P H Q Q L L Y F V D Q H T R T L E R I S Y R L K T G P M R R P E I  
L D L L H - - V T Q C S G L A A D S F T R R L Y V A E T A P P H I M V V D F D G K - - - - - N P K K  
M E V A S D H M M L V N G I A L D F I R K K I Y I A D E H T N T I E C M S Y S G S - - - - - D R H L  
L - V I T K D V S H V T S L Q V D T E N K L L Y I A D I S S R T I N A L D Y E G K - - - - - K L R T V  
K - I I A S D L G F V R G M T I D H V K S K L Y W S D D F Y K T V E S S N F D G S - - - - - Q R K V  
L E I V S T N L K Q V S D I F V D S F H A H I Y W V D S Q T R K V E R A S F D G S - - - - - N R Q E  
L D L L H - - V T Q C S G L A A D S F H A H I Y W V D S Q T R K V E R A S F D G S - - - - - N P K K  
T M I E T N N L M L V N G L T I D I V R Q R I Y F A D Q H K R T I E C M D Y N G E - - - - - D R H I  
E T I V S A N V S Y A L D L A L D P I L N H V Y W V D K T L K V I E R A N Y D G T - - - - - R R R V  
K T L V N E H M M L V Y G I A L D V V R K R I F I A D E H Q N T I E S M G Y S G E - - - - - D R H V  
L D L L H - - V T Q C S G L A A D S F T R R L Y V A E T A P P H I M V V D F D G K - - - - - N P K K  
K T I I H Q G L Q V V T D L A I D P I K H M V Y W V D Q V N S T I E R S N Y D G T - - - - - K I T V  
T A I V H L D L G L V L A L T I D Y A R S K L Y W S D T H F K N I E S S N L D G S - - - - - N R A V  
Q E L I K T S P G V I T G L S Y D L Y K K B L Y F I S Q H Q - - L S K I K Y D G S - - - - - D R T V  
F R L I N E S L G V P N A L T I D Y I T R E L F W A D A K E D Y I S V S N L D G S - - - - - R H I  
T A I V H L D L G L V L A L T I D Y T R S K L Y W S D T H F K N I E S S N L D G S - - - - - N R A V  
L D L L H - - V T Q C S G L A A D S F T R R L Y V A E T A P P H I M V V D F D G K - - - - - N P K K

Bemisia tabaci Asia 1  
T1E9W2\_Anopheles\_aquasalis  
P98163\_Drosophila\_melanogaster  
B4Q2Q9\_Drosophila\_yakuba  
B4IGA9\_Drosophila\_sechellia  
K4MUW4\_Actias\_selene  
Q1T728\_Rhyparobia\_maderae  
O76952\_Aedes\_aegypti  
Q6X0I2\_Solenopsis\_invicta  
ADE34166.1\_Nilaparvata\_lugens  
D5KXW4\_Nilaparvata\_lugens  
BAC02725\_Periplaneta\_americana  
ADM34986.1\_1\_B\_tabaci\_B  
CAJ19121\_Blattella\_germanica  
H2CLV8\_Antheraea\_pernyi  
XP\_008180459\_Acyrthosiphon\_pisum  
UPI000252AABD\_Apis\_florea  
UPI0001758603\_Tribolium\_castaneum  
T1KD20\_Tetranychus\_urticae  
UPI0002063B8E\_Apis\_mellifera  
E2FLQ4\_Bombyx\_mori

I L - - - T S K P E P K - - S V A L F D G S I Y W S V E S - - - - - S G S E I T K C A L  
- - - - -  
M L Q K S N A L M B P S - - G L S V Y E N N A F I V N I G - - - - - S V E - A V Q C A L  
M L Q K S N A L M B P S - - G L S V Y E N N A F I V N I G - - - - - S V E - A V Q C A L  
M L Q K S N A L M B P S - - G L S V Y E N N A F I V N I G - - - - - S V E - A V Q C A L  
I L T E R P Q L Q A P H - - A L A L F E D H I Y Y L V G - - - - - D S Y R L G R C L L  
I V - S S E H V K E P I - - N L A L F E G T L Y W L T A G - - - - - T G H - I T S Y K L  
I E N Q N L A V S K P I - - G I M I Y E N Q A L V L N M - - - - - A S S T V G Q C K L  
V L - - T L N M N E A L - - S I S I F E Q S L Y F L S - - - - - S D N L L S C K M  
V F - - - T S P A V P T - - D I T L F E D Y M Y V L V Q A D S A S E N I D M I E T G N - V W R C G L  
V F - - - T S P A V P T - - D I T L F E D Y M Y V L V Q A D S A S E N I D M I E T G N - V W R C G L  
I V - H N E H V Q N P I - - D M A L F E G T L Y W L T A G - - - - - T G Q - L T S Y K L  
I L - - - T S K P E P K - - S V A L F D G S I Y W S V E S - - - - - S G S E I T K C A L  
V V D S N E H V Q K P I - - N L A L F E G T L Y W L T S G - - - - - T G Q - L T S Y K L  
I L T E R P Q L Q A P H - - A L A L F E D H I Y Y L V G - - - - - D S Y R L G R C L L  
L V - - N S I E H I P P - - K I S L Y E D K L F W T N H E - - - - - T G L S I F K C K V  
V L - - N T D I H Q A M - - S I N I Y E D S L Y W L M G G - - - - - T G I - I R K C K L  
L L - - - S N L Q S V - - G L N F F E N H L Y E K - - - - - S G N F M Q K C R L  
I V H K A N S R P I S R V F A I T L F E D Y L Y W T D W - - - - - E R H T I A M C H K  
V L - - N T G I H Q A M - - S I N I Y E D F L Y W L M G G - - - - - T G I - I R K C K L  
I L T E R P Q L Q A P H - - A L A L F E D H I Y Y L V G - - - - - D S Y R L G R C L L

Bemisia tabaci Asia 1  
T1E9W2\_Anopheles\_aquasalis  
P98163\_Drosophila\_melanogaster  
B4Q2Q9\_Drosophila\_yakuba  
B4IGA9\_Drosophila\_sechellia  
K4MUW4\_Actias\_selene  
Q1T728\_Rhyparobia\_maderae  
O76952\_Aedes\_aegypti  
Q6X0I2\_Solenopsis\_invicta  
ADE34166.1\_Nilaparvata\_lugens  
D5KXW4\_Nilaparvata\_lugens  
BAC02725\_Periplaneta\_americana  
ADM34986.1\_1\_B\_tabaci\_B  
CAJ19121\_Blattella\_germanica  
H2CLV8\_Antheraea\_pernyi  
XP\_008180459\_Acyrthosiphon\_pisum  
UPI000252AABD\_Apis\_florea  
UPI0001758603\_Tribolium\_castaneum  
T1KD20\_Tetranychus\_urticae  
UPI0002063B8E\_Apis\_mellifera  
E2FLQ4\_Bombyx\_mori

Q G L S T E S Y S C N Q I P I K V V D P I T H F T L M Q P A L Q - - R - N I S N A C R N M - - E C S  
- - - - -  
Y G S R I C - - H K I S I N V L N A Q - - - D I V V A G R S R Q - - P Q K A S H P C A H A - - H C H  
Y G S R T C - - H K I S I N V L N A Q - - - D I V V A G K S R Q - - P Q K L S H P C G H A - - H C H  
Y G S R I C - - H K I S I N V L N A Q - - - D I V V A G R S R Q - - P E K A S H P C A H A - - H C H  
H G P K N C - - - - E T Y I Y R V F E A N T F V I R H E S I Q - - R D D L V N E C A G H - - D C S  
Y G P P E M R E N K E Q L Y S Y G T E - - - H F T I L Q P S M Q - - P - L V A N P C A N H - - T C S  
Y G D F E C - - - - R L M E L N V H N S N Q L L I V Q E S R Q - - P - E A E N V C D T K Q I N C S  
Y G K R S C - - - - E H V N I G A N N V P R L F S I L H I S R Q - - V - P F A N P C D A E - - Y C D  
Y G A A Y Q K C E L F R I H P K H F T V P Y H F E I M H P G L Q - - L - K G H N D C R N S T - D C Q  
Y G A A Y Q K C E L F R I H P K H F T V P Y H F E I M H P G L Q - - L - K G H N D C R N S T - D C Q  
Y G P H E R R I G K L Q L Y I K S S D - - - Q F T I L Q Q A I Q - - P - A A V N P C A N H - - S C S  
Q G L S T E S Y S C N Q I P I K V V D P I T H F T L M Q P A L Q - - R - N I S N A C R N M - - E C S  
Y G P P E R P P D K H Q L Y S Y G T E - - - H F A I L Q A S M Q - - P - I I V N P C A N H - - T C D  
H G P K N C - - - - E T Y I Y R V F D A N T F V I R H E S I Q - - R D D L V N E C A A H - - D C S  
L G S E N V - - - - H C E S V P V Q V E A T I E T F T I S Q Q A K Q - - R - N G S N V C I D V - - D C D  
Y G D K L C - - - - T T I S I G T S N I N K Y F I L L H T I R O - - P - I G K N V C E K Y - - K C N  
Y S P I T C - - - - E T F G L K G D - - - V F A I A Q E S R Q - - P E F G N N P C Q N H - - T C N  
Y H C N S S - - - - S K V L S I S E R P M D I H I Y H F F R O I N P - K F E N P C N L L - - N C S  
Y G D K S C - - - - T T I P I G T S N I N K Y F I L L H T I R O - - P - I G K N V C E K Y - - K C N  
H G P K N C - - - - E T Y I Y R V F D A N T F V I R H E S I Q - - R D D L V N E C A G H - - D C S

|                                   |     |     |                      |           |     |               |     |
|-----------------------------------|-----|-----|----------------------|-----------|-----|---------------|-----|
| <u>Bemisia tabaci Asia 1</u>      | --- | HMC | ---                  | VLSSTL    | --- | PSCI          | --- |
| T1E9W2_Anopheles_aquasalis        | --- | RGV | ---                  | ---       | --- | QDTA          | --- |
| P98163_Drosophila_melanogaster    | --- | GLC | ---                  | LQADYG    | --- | YECM          | --- |
| B4Q2Q9_Drosophila_yakuba          | --- | GLC | ---                  | LQADYG    | --- | YECM          | --- |
| B4IGA9_Drosophila_sechellia       | --- | GLC | ---                  | LQADYG    | --- | YECM          | --- |
| K4MUW4_Actias_selene              | --- | NVC | ---                  | VLEKA     | --- | PVCV          | --- |
| Q1T728_Rhyparobia_maderae         | --- | EMC | ---                  | VLSPGR    | --- | NPSCI         | --- |
| O76952_Aedes_aegypti              | --- | HVC | ---                  | VPGADG    | --- | HGCVI         | --- |
| Q6X0I2_Solenopsis_invicta         | --- | YMC | ---                  | VLKKEN    | --- | ATCI          | --- |
| ADE34166.1_Nilaparvata_lugens     | SAG | GMC | ---                  | LLRNHKLRP | SAV | CV            | --- |
| D5KXW4_Nilaparvata_lugens         | SAG | GMC | ---                  | LLRNHKLRP | SAV | CV            | --- |
| BAC02725_Periplaneta_americana    | --- | ELC | ---                  | VMNPGG    | --- | TPSCI         | --- |
| ADM34986.1_1_B_tabaci_B           | --- | HMC | ---                  | VLSSTL    | --- | PSCI          | --- |
| CAJ19121_Blattella_germanica      | --- | EMC | ---                  | VLSPSG    | --- | YPVCL         | --- |
| H2CLV8_Antheraea_pernyi           | --- | NVC | ---                  | VLEKA     | --- | PVCV          | --- |
| XP_008180459_Acyrtosiphon_pisum   | --- | FIC | ---                  | TSGSKG    | --- | PMCV          | --- |
| UPI000252AABD_Apis_florea         | --- | HVC | ---                  | VLGNG     | --- | PACI          | --- |
| UPI0001758603_Tribolium_castaneum | --- | QLC | ---                  | IPAKPQ    | --- | YRCL          | --- |
| T1KD20_Tetranychus_urticae        | --- | GLC | LLRPGLTHQAVGVCSCPDDH | VLGPNG    | --- | RSNISNCSDSQFR | C   |
| UPI0002063B8E_Apis_mellifera      | --- | YMC | ---                  | VLGNG     | --- | PACI          | --- |
| E2FLQ4_Bombyx_mori                | --- | NVC | ---                  | VLEKA     | --- | PVCV          | --- |

|                                   |                                           |        |         |     |
|-----------------------------------|-------------------------------------------|--------|---------|-----|
| <u>Bemisia tabaci Asia 1</u>      | ---                                       | CR     | NGKIVPP | --- |
| T1E9W2_Anopheles_aquasalis        | ---                                       | CHLSGE | ---     | --- |
| P98163_Drosophila_melanogaster    | ---                                       | CG     | N-RLVAE | --- |
| B4Q2Q9_Drosophila_yakuba          | ---                                       | CA     | N-RLVAE | --- |
| B4IGA9_Drosophila_sechellia       | ---                                       | CG     | N-RLVAE | --- |
| K4MUW4_Actias_selene              | ---                                       | CD     | DGHVRDD | --- |
| Q1T728_Rhyparobia_maderae         | ---                                       | CS     | DSTTRSM | --- |
| O76952_Aedes_aegypti              | ---                                       | CH     | NGERIHG | --- |
| Q6X0I2_Solenopsis_invicta         | ---                                       | CS     | DGESIES | --- |
| ADE34166.1_Nilaparvata_lugens     | ---                                       | CA     | DGTRMR  | --- |
| D5KXW4_Nilaparvata_lugens         | ---                                       | CA     | DGTRMR  | --- |
| BAC02725_Periplaneta_americana    | ---                                       | CS     | GGQVEM  | --- |
| ADM34986.1_1_B_tabaci_B           | ---                                       | CR     | NGKIVPP | --- |
| CAJ19121_Blattella_germanica      | ---                                       | CS     | DGTIVEM | --- |
| H2CLV8_Antheraea_pernyi           | ---                                       | CD     | DGHVRDD | --- |
| XP_008180459_Acyrtosiphon_pisum   | ---                                       | CG     | DGSQVEP | --- |
| UPI000252AABD_Apis_florea         | ---                                       | CF     | NGYSKDS | --- |
| UPI0001758603_Tribolium_castaneum | ---                                       | CE     | NGKFVEP | --- |
| T1KD20_Tetranychus_urticae        | KRTMKCISKKWVCDKHHDDCKDGSDEPEQCKLSSCETGFFT | CR     | NGSCIPV | --- |
| UPI0002063B8E_Apis_mellifera      | ---                                       | CF     | DGYPKDS | --- |
| E2FLQ4_Bombyx_mori                | ---                                       | CD     | DGHVRDD | --- |

|                                   |                                                 |     |
|-----------------------------------|-------------------------------------------------|-----|
| <u>Bemisia tabaci Asia 1</u>      | KTACTDSNYMPE                                    | --- |
| T1E9W2_Anopheles_aquasalis        | ---                                             | --- |
| P98163_Drosophila_melanogaster    | GERCPHSGNEVAVLG                                 | --- |
| B4Q2Q9_Drosophila_yakuba          | GERCPHSGNEVAVLG                                 | --- |
| B4IGA9_Drosophila_sechellia       | GERCPHSGNEVAVLG                                 | --- |
| K4MUW4_Actias_selene              | GN-CDPSSKNELPLFN                                | --- |
| Q1T728_Rhyparobia_maderae         | GEPCPAREEIIYERSSI                               | --- |
| O76952_Aedes_aegypti              | TDICPQTSNVMTPLVK                                | --- |
| Q6X0I2_Solenopsis_invicta         | NSTCNIKNDL                                      | --- |
| ADE34166.1_Nilaparvata_lugens     | NSICEASSATIFDYDD                                | --- |
| D5KXW4_Nilaparvata_lugens         | NSICEASSATIFDYDD                                | --- |
| BAC02725_Periplaneta_americana    | GELCPTSEVGEGP                                   | --- |
| ADM34986.1_1_B_tabaci_B           | KTACTDSNYMPE                                    | --- |
| CAJ19121_Blattella_germanica      | GKSCP-KEELHDGSR                                 | --- |
| H2CLV8_Antheraea_pernyi           | GN-CDPSSKNELPLFN                                | --- |
| XP_008180459_Acyrtosiphon_pisum   | GNICDDAGHRKLPVFK                                | --- |
| UPI000252AABD_Apis_florea         | KNICSENMNTRLIFNS                                | --- |
| UPI0001758603_Tribolium_castaneum | EEDCD--TLMREANDD                                | --- |
| T1KD20_Tetranychus_urticae        | NQFCDGISQCSDGSDEECGHNLDIRCAECTIEGCKSICLNGGSCYMD | EQQ |
| UPI0002063B8E_Apis_mellifera      | KNTCLENMNTKLIFFNS                               | --- |
| E2FLQ4_Bombyx_mori                | GS-CDSSKNELPLFN                                 | --- |

```

Bemisia tabaci Asia 1
T1E9W2_Anopheles_aquasalis
P98163_Drosophila_melanogaster
B4Q2Q9_Drosophila_yakuba
B4IGA9_Drosophila_sechellia
K4MUW4_Actias_selene
Q1T728_Rhyarobia_maderae
O76952_Aedes_aegypti
Q6X0I2_Solenopsis_invicta
ADE34166.1_Nilaparvata_lugens
D5KXW4_Nilaparvata_lugens
BAC02725_Periplaneta_americana
ADM34986.1_1_B_tabaci_B
CAJ19121_Blattella_germanica
H2CLV8_Antheraea_pernyi
XP_008180459_Acyrtosiphon_pisum
UPI000252AABD_Apis_florea
UPI0001758603_Tribolium_castaneum
T1KD20_Tetranychus_urticae
UPI0002063B8E_Apis_mellifera
E2FLQ4_Bombyx_mori

```

```

AKCNCQNGYNGSRCEYNICNCKNGATCLASGGEGKICISPGFTGKLCETV

```

```

Bemisia tabaci Asia 1
T1E9W2_Anopheles_aquasalis
P98163_Drosophila_melanogaster
B4Q2Q9_Drosophila_yakuba
B4IGA9_Drosophila_sechellia
K4MUW4_Actias_selene
Q1T728_Rhyarobia_maderae
O76952_Aedes_aegypti
Q6X0I2_Solenopsis_invicta
ADE34166.1_Nilaparvata_lugens
D5KXW4_Nilaparvata_lugens
BAC02725_Periplaneta_americana
ADM34986.1_1_B_tabaci_B
CAJ19121_Blattella_germanica
H2CLV8_Antheraea_pernyi
XP_008180459_Acyrtosiphon_pisum
UPI000252AABD_Apis_florea
UPI0001758603_Tribolium_castaneum
T1KD20_Tetranychus_urticae
UPI0002063B8E_Apis_mellifera
E2FLQ4_Bombyx_mori

```

```

-----TFHLET TGTVDG-----
-----SWTVR-----
A--VNSLELEHE-----
A--VNSLELEQE-----
A--VNSLELEQE-----
-----GWTYQDYQRGHR-----
-----GIDTNT EVMRKK-----
-----THLGEAAPNVHD-----
-----KFVESINFSRN-----
-----VTYLT SNSPVQT-----
-----VTYLT SNSPVQT-----
-----WFEKVT PRGKQ-----
-----TFHLET TGTVDG-----
-----SHGLD SSKESGG-----
-----GWTYQDYQRGHR-----
-----DLDYKKN-----
-----SLVTYKNESIRH-----
-----GRRVKALHYVNN-----
TDPKCDNFICLNGGYCMVKDDLPHYCECPAGWKGSKCEKVKTGDEICDHYC
-----SLVIYKNESIRH-----
-----GWTYQDYQRGHR-----

```

```

Bemisia tabaci Asia 1
T1E9W2_Anopheles_aquasalis
P98163_Drosophila_melanogaster
B4Q2Q9_Drosophila_yakuba
B4IGA9_Drosophila_sechellia
K4MUW4_Actias_selene
Q1T728_Rhyarobia_maderae
O76952_Aedes_aegypti
Q6X0I2_Solenopsis_invicta
ADE34166.1_Nilaparvata_lugens
D5KXW4_Nilaparvata_lugens
BAC02725_Periplaneta_americana
ADM34986.1_1_B_tabaci_B
CAJ19121_Blattella_germanica
H2CLV8_Antheraea_pernyi
XP_008180459_Acyrtosiphon_pisum
UPI000252AABD_Apis_florea
UPI0001758603_Tribolium_castaneum
T1KD20_Tetranychus_urticae
UPI0002063B8E_Apis_mellifera
E2FLQ4_Bombyx_mori

```

```

LNSGNCTFTGGHFPPSCRCPAGWIGPRCQIAEGCKGFCLNGGLCKLTSDP

```

Transmembrane region

```

Bemisia tabaci Asia 1
T1E9W2_Anopheles_aquasalis
-----QSEYSSICATIIILVAFIGTTRFAL-----

```

|                                   |                                                    |
|-----------------------------------|----------------------------------------------------|
| P98163_Drosophila_melanogaster    | -----HEQNGHFHWMALFVLAAGSLIAGLQYMY                  |
| B4Q2Q9_Drosophila_yakuba          | -----QHGHFHWMALFVLAAGSLIAGLQYMY                    |
| B4IGA9_Drosophila_sechellia       | -----QEQNGHFHWMALLVLAAGSLIAGLQYMY                  |
| K4MUW4_Actias_selene              | -----ASITVVI AVLVLFLVYIALFVYYH                     |
| Q1T728_Rhyarobia_maderae          | -----QSSEFNKGFVVLVILILVLAAGVLAAGVYYK               |
| O76952_Aedes_aegypti              | -----SSDESSGSTIANVFLVLLILALVGVAGGYI                |
| Q6X0I2_Solenopsis_invicta         | -----TRNISGIYSITIIIVLLVSVLLCVVYYFY                 |
| ADE34166.1_Nilaparvata_lugens     | -----SSLGSAFWMFLAFIFVVPVVGILWFVY                   |
| D5KXW4_Nilaparvata_lugens         | -----SSLGSAFWMFLAFIFVVPVVGILWFVY                   |
| BAC02725_Periplaneta_americana    | -----GGKSEEMQHSSNVGGIIIAILVIALVVGVAAYYYK           |
| ADM34986.1_1_B_tabaci_B           | -----QSPQYSWSSICATIIILVAFITGTFYAL                  |
| CAJ19121_Blattella_germanica      | -----TQAAGKSAGLVMGLIIIAVIAITLGAAYYK                |
| H2CLV8_Antheraea_pernyi           | -----ASITVVI AVLVLFLVYIALFVYYH                     |
| XP_008180459_Acyrtosiphon_pisum   | -----MISIIYISIFLIVMLLGLAMYYF                       |
| UPI000252AABD_Apis_florea         | -----QNGTLIGIIITVLCIILIGSAVYYFY                    |
| UPI0001758603_Tribolium_castaneum | -----YASSNLGVPVIAAGVMISICLVVLAAYYYL                |
| T1KD20_Tetranychus_urticae        | LKTPYICICPPLSEGRKCEKARSSSTAGPVAMTVITICVVVVTVLFLMFG |
| UPI0002063B8E_Apis_mellifera      | -----QNGTLIGIIITVLCIILIGSAVYYFY                    |
| E2FLQ4_Bombyx_mori                | -----ASITVVI AVLVLFLVYIALFVYYH                     |

### Cytoplasmic region

|                                   |                                                  |
|-----------------------------------|--------------------------------------------------|
| <u>Bemisia_tabaci_Asia_1</u>      | FYYYS-----KYNMRRLF--PSIHFKNP---AFNLQSKFQANG      |
| T1E9W2_Anopheles_aquasalis        | -----                                            |
| P98163_Drosophila_melanogaster    | YQYRQ-----RGHTDLNI--NMHFQNPPLATLGGTKAPLEHER      |
| B4Q2Q9_Drosophila_yakuba          | YQYRK-----RGHTDLNI--NMHFQNPPLATLSGKGFMEHER       |
| B4IGA9_Drosophila_sechellia       | YQYRQ-----RGHTDLNI--NMHFQNPPLATLGGTKAPLEHER      |
| K4MUW4_Actias_selene              | FVYKP-----KRRRSTAY--TEVRFQNS-----                |
| Q1T728_Rhyarobia_maderae          | YGF-----NKDSKEGF--SMHFSNP---TFGVQS-----          |
| O76952_Aedes_aegypti              | YRR-----RYQKEDI--GMHFNHP-----                    |
| Q6X0I2_Solenopsis_invicta         | QKNKL-----KSKPASNLSCSSIHFNQP---SYDRSDEI-----     |
| ADE34166.1_Nilaparvata_lugens     | RGGPPSVPLSPPQWMPGCARRFPF--HTIRFNSK---FGNLDADDTIP |
| D5KXW4_Nilaparvata_lugens         | RGGPPSVPLSPPQWMPGCARRFPF--HTIRFNSK---FGNLDADDTIP |
| BAC02725_Periplaneta_americana    | RFG-----YKPKLNF--SLHFKNP---TFGKLE-----           |
| ADM34986.1_1_B_tabaci_B           | FYYYS-----KYNMRRLF--PSIHFKNP---AFNLQSKFQANG      |
| CAJ19121_Blattella_germanica      | YRG-----KNSKKEGF--SMHFQNP---TFGVRN-----          |
| H2CLV8_Antheraea_pernyi           | FVYKP-----KRRRSTAY--TEVRFQNS-----                |
| XP_008180459_Acyrtosiphon_pisum   | LFYSK-----NKSINQLV--SRLFHRPLTT-----              |
| UPI000252AABD_Apis_florea         | QKIKP-----NFSKKNL--SIHFQNP---SYDQRN-----         |
| UPI0001758603_Tribolium_castaneum | IKR-----RNSGTFNV--ISMKFNHP---GYGLH-----          |
| T1KD20_Tetranychus_urticae        | LRIRARS-----RAMEHQRIDESANLEISNP--MFGDVBDDCVT     |
| UPI0002063B8E_Apis_mellifera      | QKIKP-----NFSKKNL--SIHFQNP---SYDQRN-----         |
| E2FLQ4_Bombyx_mori                | FVYKP-----KRRRSTAY--TEVRFQNS-----                |

|                                   |                                                     |
|-----------------------------------|-----------------------------------------------------|
| <u>Bemisia_tabaci_Asia_1</u>      | M-----TGLASGNHMAHLSS                                |
| T1E9W2_Anopheles_aquasalis        | -----                                               |
| P98163_Drosophila_melanogaster    | AEAGVGFTTETGTVSSRGSNDT-FTTTSATSSFAAQFQFVSNALQRLLRP  |
| B4Q2Q9_Drosophila_yakuba          | AEAGVGAFAPETGTVSSRGSNDTFTTTTTTSSSFVAQFQFVSNALQRLLRP |
| B4IGA9_Drosophila_sechellia       | TEAGVGAFATETGTVSSRGSNDT-FTTTSASSSFVAQFQFVSNALQRLLRP |
| K4MUW4_Actias_selene              | -----SDEAAQLSCSP                                    |
| Q1T728_Rhyarobia_maderae          | -----PESHLDTPSESLVP                                 |
| O76952_Aedes_aegypti              | -----ELSTADAAEVKMFQK                                |
| Q6X0I2_Solenopsis_invicta         | -----EVMDSMASSELSLP                                 |
| ADE34166.1_Nilaparvata_lugens     | -----AYSDFQFHPQQLNP                                 |
| D5KXW4_Nilaparvata_lugens         | -----AYSDFQFHPQQLNP                                 |
| BAC02725_Periplaneta_americana    | -----SDVAVPQVLP                                     |
| ADM34986.1_1_B_tabaci_B           | M-----TGLASGNHMAHLSS                                |
| CAJ19121_Blattella_germanica      | -----STENPSTPPQGLVP                                 |
| H2CLV8_Antheraea_pernyi           | -----SDEAAQLSCSP                                    |
| XP_008180459_Acyrtosiphon_pisum   | -----VIQVIDQKEEINS                                  |
| UPI000252AABD_Apis_florea         | -----EIAPTLNCISGLPP                                 |
| UPI0001758603_Tribolium_castaneum | -----TDEFDRSILKP                                    |
| T1KD20_Tetranychus_urticae        | -----TERPTQTFSLKSD                                  |
| UPI0002063B8E_Apis_mellifera      | -----EIAPTLNCISGLPP                                 |
| E2FLQ4_Bombyx_mori                | -----SDEAAQLSCSP                                    |

|                                |                                                    |
|--------------------------------|----------------------------------------------------|
| <u>Bemisia_tabaci_Asia_1</u>   | KDHHFENPLQESRE-----GEVRIVTPNEITISR-AETSWSAHLEDSSS  |
| T1E9W2_Anopheles_aquasalis     | -----                                              |
| P98163_Drosophila_melanogaster | RQSASGDPMAQELLESFSPRESKHLALDGGGAGG-DGDDGGRVGRQVPDI |
| B4Q2Q9_Drosophila_yakuba       | RQAASGDPMAQELLESF-RESNLHSVDGGGAGG----CGGGVGRQVPDI  |



B4IGA9\_Drosophila\_sechellia RQSASGDPM AQELLESPL-RESKLSLDGGGDGC--- --GVGRQVPDI  
K4MUW4\_Actias\_selene AVQMNGNQLINGNEFVNPLQYVRNVWQQSIIRKRP-RPVCTAGLSIAVPNS  
Q1T728\_Rhyarobia\_maderae GQHQYVNFDSAGVREHPDGKVVMI PHEKISPAK-LETPHTTAEADEGAE  
076952\_Aedes\_aegypti VPRLNQTFTHNELTLETPPHRPPCQ GDNSSSEST-GQNNVTSTALELENM  
Q6X0I2\_Solenopsis\_invicta GQHEYINPIINNKGMKAAE--- --NNAKK-SNQCSEKNIIEEKQ  
ADE34166.1\_Nilaparvata\_lugens GEHQYENPIAAMQAEQNSGAAITIKTMNEIDIQM-GEKNGWMAGGEGG  
D5KXW4\_Nilaparvata\_lugens GEHQYENPIAAMQAEQNSGAAITIKTMNEIDIQM-GEKNGWMAGGEGG  
BAC02725\_Periplaneta\_american GQHQYINPFDNAEALKQL-EGSVIQESRLKLA-DH--- --IQLEDE  
ADM34986.1\_1\_B\_tabaci\_B KDHFENPLQESRE--- --GEVRIVTPNEITISR-AETSWTSAHLEDSSS  
CAJ19121\_Blattella\_germanica GQHQYINPFDSAGVLEHP--DGKVLILSQQEKPP-VLIRIPSSERTDA  
H2CLV8\_Antheraea\_pernyi AVQMNGNQLINGNEFVNPLQYVRNVWQQSIIRKRP-RPVCTAGLSIAVPNS  
XP\_008180459\_Acyrthosiphon\_pisum RYNVYENPMNEDGLIKDHACGSEIVLNYDSARYV-NA--- --NCSEPLLN  
UPI000252AABD\_Apis\_florea GEHEYENPII--- --DIQKNQ-NENITQKNEKQMTKI  
UPI0001758603\_Tribolium\_castaneum GQHEYENPVEFYGSENDNHNIQVNV--- --  
T1KD20\_Tetranychus\_urticae KSKNFSNPMYEFQQTIDEEKRNLLEKNDMTEFPKDELNGESNGVIGDGL  
UPI0002063B8E\_Apis\_mellifera GEHEYENPII--- --DIQKNQ-NENITQKNEKQMTKI  
E2FLQ4\_Bombyx\_mori AVQMNGNQLINGNEFVNPLQYVRNVWQQSIIRKRS-RPVCTAGLSIAVPNS

Bemisia\_tabaci\_Asia\_1 I E T E Y A D L V V E - - - - - T N P K A N L I S -  
T1E9W2\_Anopeles\_aquasalis - - - - - - - - - - - - - - - - - - - - - - - - -  
P98163\_Drosophila\_melanogaster L V A D M D D D A A K S A G Q F G G N Y A G N D A N A R F V S -  
B4Q2Q9\_Drosophila\_yakuba L V A D M D D D A A K S G G Q F G G H Y A G D D A N A R F V P -  
B4IGA9\_Drosophila\_sechellia L V A D M D D D A A K S A G Q F G G N Y A G D D A N A R F V S -  
K4MUW4\_Actias\_selene P Q Q D F S D T E S D L D D R E T - - - K R F I L K N K F L N -  
Q1T728\_Rhyarobia\_maderae M E D D T D Q G F I T - - - - - D T D S M K V K L I P -  
076952\_Aedes\_aegypti S D V D S M E D A Y D - - - - - C R D D P L Q R L I L -  
Q6X0I2\_Solenopsis\_invicta D A L I Y F V H N S K - - - - - - - - - - - - - - - - - - -  
ADE34166.1\_Nilaparvata\_lugens D D S D S S T V E M P - - - - - - - - - - - - - - - - - - -  
D5KXW4\_Nilaparvata\_lugens D D S D S S T V E M P - - - - - - - - - - - - - - - - - - -  
BAC02725\_Periplaneta\_american D A E D Y A P D G S D - - - - - - - - - - - - - - - - - - -  
ADM34986.1\_1\_B\_tabaci\_B I E T E Y A D L V V E - - - - - T N P K A N L I S -  
CAJ19121\_Blattella\_germanica A D F E M E D D T S Q - - E F V S - - - D N N D M K A P L I S -  
H2CLV8\_Antheraea\_pernyi P Q Q D F S D T E S D L D D R E T - - - K R F I L K N K F L N -  
XP\_008180459\_Acyrthosiphon\_pisum S F S E Y D E N E K K - - - - - - - - - - - - - - - - - - -  
UPI000252AABD\_Apis\_florea L N F D R S D N E S E - - - - - E - - - S A Y K Q D I S L I -  
UPI0001758603\_Tribolium\_castaneum - - - - - - - - - - - - - - - - - - - - - - - - -  
T1KD20\_Tetranychus\_urticae P A F L L S E L V V P G H F K T T K E I L D T K K L S D P L Y V G  
UPI0002063B8E\_Apis\_mellifera L N F D R S D N E S E - - - - - E - - - S A N K Q D I S L I -  
E2FLQ4\_Bombyx\_mori P Q Q D F S D T E S D L D D R E T - - - K R F I R K N K F L N -
